# Supplementary material for: ON selectivity in the Drosophila visual system is a multisynaptic process involving both glutamatergic and GABAergic inhibition
Source: eLife journal article supplement (doi:10.7554/elife.49373), 2019-09-19
Supplement: supp [file elife-49373-supp-v1.zip]

## Source Code File

This document contains all codes (and related sub-functions) for analyzing and plotting responses to 5sec ON/OFF full field flashes (fff) and ON/OFF moving edges stimuli.

### Full field flash analysis code

Script name: fff\_analysis\_elife

Sub-functions needed:

```
data_base_select_samples_elife.m  
load_genotypes_conditions_elife.m  
create_experimental_conditions_structure_elife.m  
load_neuron_data10Hz_byLayer_elife.m  
load_neuron_data10Hz_elife.m  
  
BASELINE_aggregate_fffall_means10Hz_BleedThruFix_elife.m  
  
mean_cat_elife.m  
  
fff_stimulus_response_filters_elife.m  
  
niceaxes.m  
  
plot_err_patch_v2.m
```

```
% Analysis and plotting script for ON / OFF full field flashes (fff).  
% It loads and analyze all files for given genotypes conditions given in a txt file. It saves  
variables for future use.  
% file (automatized mode) or for an specific genotype (non-automatized  
% mode)
```

```
% Author: Sebastian Molina-Obando
```

```
opengl software  
clear all;  
close all;
```

```
%add the path of needed functions  
addpath(genpath('C:\MATLAB_FOLDER\TP_code_Seb'));
```

```
%% USER INPUT: GENERAL CONSTANTS
```

```
% The user need to define this.
```

```
Automatized = true; % "True" if a txt file for the automatized mode is used. Otherwise, write  
"false".
```

```
outlier_filter = false; % "True" for filetering out the outliers on ROI matrix. Otherwise, write  
"false".
```

```
outlier_measure = 'Integral'; % It defines the measurement for outliers (Step, Integral...)
```

```
save_data = true; % "True" for saving data (variables and plots) in a folder in your computer.  
Otherwise, write "false".
```

```
save_in_folder = 'C:\MATLAB_FOLDER\2p\2p_pData\5secffleLife\GenotypesData\'; % Write
the path of the folder
```

```
%% USER INPUT: CONSTANTS FOR THE NON-AUTOMATIZED MODE
% The user need to define this only when using the non-automatized mode.
% If theAutomatized mode is used, the constants will be automatically
% redefine as stated in the txt file.
```

```
% General Information
```

```
GENOTYPE = 'Mi1_LexA_LexAop_GCaMP6f_GluCla.Flp.D_+'; % This GENOTYPE name will
be used to save the data in the computer
PAIRED_CONTROL = 'Mi4_LexA_LexAop_GCaMP6f_GluCla.Flp.D_+'; % It is the existing
GENOTYPE data of the paired-control (e.g. responses before DRUG are paired with responses
after DRUG)
paired_data = false; %"True" if the current analyzed GENOTYPE has a PAIRED_CONTROL.
Otherwise, write "false".
experimental_conditions =
'i_fff5s.*i_Mi1_LexA_LexAop_GCaMP6f_GluCla.Flp.D.*i_GluCla_KO_exp'; % Concatenation of
all conditions that define the experimental GENOTYPE
NEURONAL_TYPE = 'Mi1'; %Write the the cell type being analyzed. Each cell type responses
are plotted with individualized axis
NEURON_POLARITY = 'ON'; %Select the cell-type response polarity to apply polarity-spesific
response filters. Write 'ON', 'OFF' or " (blank, in the case of not defined polarity)
BASELINE = 'mean'; %Define what is the baseline (F) signal for the dF/F analysis. Write 'ON' >
baseline = mean response at the end of the ON stimulus, 'OFF' > baseline = mean response at
the end of the OFF stimulus, or 'mean' > baseline = whole trace mean
NORMALIZE_ROI = false; %"True" to NORMALIZE the response of each ROI (here, a cell).
Otherwise, write "false". By default it normalized all the values to the max value in the response
trace.
NORMALIZE_FLY = true; %"True" to NORMALIZE the response of each FLY (mean of cells).
Otherwise, write "false".
NORMALIZATION_TYPE = 'ON_Step'; % Choose between 'ON_Step', 'OFF_Step',
'ON_Integral', 'OFF_Integral', or 'Max'
analysis_by_layer = true; %"True" if the selected ROIs (cells) have been categorized in different
layers. Otherwise, write "false".
LAYER = 'M1'; %Select the layer to be analyzed. (E.g. 'M1', 'M2', 'M5', 'M9', 'Ax', 'De', 'Lo')
UseControlIDs = false;
col1 = [99/256 99/256 99/256]; %Define the color for the mean trace. (here, grey)
col2 = [189/256 189/256 189/256]; %Define the color for the sem patch trace. (here, light grey)
```

```
% Input the values for the different response filters
```

```
stimulus_response_correlation_filter = 0; % Correlation value to filter non-correlated responses.
(1 = correlated, -1 = anticorrelated, 0 = non-correlated)
ApplyThreshold_ON = false; %"True" to apply a treshold for ON-responding ROIs. Otherwise,
write "false".
ApplyThreshold_OFF = false; %"True" to apply a treshold for OFF-responding ROIs. Otherwise,
write "false".
Threshold_ON = 2.5; %Value for the ON filter. The final treshold value will be =
Threshold_ON*std of the 1 sec preciding the ON step
Threshold_OFF = 2.5; %Value for the OFF filter. The final treshold value will be =
Threshold_OFF*std of the 1 sec preciding the OFF step
ApplyPeakThreshold = false; %"True" to apply dF/F absolute threshold. Otherwise, write "false".
Threshold_Peak = 0.5; %dF/F threshold, absolut value.
Apply_STD_filter = true; %"True" to apply an std filter of 0.2 to discard noisy/moving ROIs.
Otherwise, write "false". The std is checked when the neuron is not responding to the stimulus.
```

```
%% Selecting samples from Database
```

```

pdatapath=('C:\MATLAB_FOLDER\2p\2p_pData'); % Path where the pData files are. (pData
files contains all the raw data per ROI)
cd(pdatapath);
database_select_samples_elif; %Here all the different experimental conditions are added (E.g.
genotype, stimulus presented, experiment number, quality of recording, DRUG...)

```

```

%% Automatized Analysis: data selection from a txt file list
% A 'Genotype_List.txt' file is needed in the "pdatapath". This contains
% the list of all the genotypes, general information and filter conditions
% to be applied in every case.

```

```

stopForLoop = false;

```

```

for aut_i = 1:length(GENOTYPE)
    %Here we load all the information per genotype in every loop
    if stopForLoop
        break
    end
    if Automatized
        close all
        [GENOTYPE, PAIRED_CONTROL,paired_data,analysis_by_layer,LAYER,...
        ApplyThreshold_ON,Threshold_ON,ApplyThreshold_OFF,Threshold_OFF,...
        ApplyPeakThreshold,
        Threshold_Peak,BASELINE,NORMALIZE_ROI,NORMALIZE_FLY,...
        NORMALIZATION_TYPE,NEURON_POLARITY,stimulus_response_correlation_filter,
        experimental_conditions,Apply_STD_filter]...

=load_genotype_conditions_elif(Automatized,GENOTYPE,PAIRED_CONTROL,paired_data,a
nalysis_by_layer,LAYER,...
        ApplyThreshold_ON,Threshold_ON,ApplyThreshold_OFF,Threshold_OFF,...
        ApplyPeakThreshold,
        Threshold_Peak,BASELINE,NORMALIZE_ROI,NORMALIZE_FLY,...

NORMALIZATION_TYPE,NEURON_POLARITY,stimulus_response_correlation_filter,Apply_ST
D_filter);

```

```

    GENOTYPE = char(GENOTYPE(aut_i));
    PAIRED_CONTROL = char(PAIRED_CONTROL(aut_i));
    paired_data = paired_data(aut_i);
    analysis_by_layer = analysis_by_layer(aut_i);
    LAYER = char(LAYER(aut_i));
    ApplyThreshold_ON = ApplyThreshold_ON(aut_i);
    Threshold_ON = Threshold_ON(aut_i);
    ApplyThreshold_OFF = ApplyThreshold_OFF(aut_i);
    Threshold_OFF = Threshold_OFF(aut_i);
    ApplyPeakThreshold = ApplyPeakThreshold(aut_i);
    Threshold_Peak = Threshold_Peak(aut_i);
    Apply_STD_filter = Apply_STD_filter(aut_i);
    BASELINE = char(BASELINE(aut_i));
    NORMALIZE_ROI = NORMALIZE_ROI(aut_i);
    NORMALIZE_FLY = NORMALIZE_FLY(aut_i);
    NORMALIZATION_TYPE = char(NORMALIZATION_TYPE(aut_i));
    NEURON_POLARITY = char(NEURON_POLARITY(aut_i));
    stimulus_response_correlation_filter = stimulus_response_correlation_filter(aut_i);
    experimental_conditions = find(eval(char(experimental_conditions(aut_i)))); %
experimental_conditions

```

```

    if NORMALIZE_ROI
        gen_str = [GENOTYPE ' Normalized responses']
    end

```

```

else
    gen_str = GENOTYPE;
end

else
    experimental_conditions = find(eval(experimental_conditions));
    stopForLoop = true;

    if NORMALIZE_ROI
        gen_str = [GENOTYPE ' Normalized responses to ROIs']
    else
        gen_str = GENOTYPE;
    end
end

%% ANALYSIS
% Here we create a experimental conditions structure which contains
% the pData files matching the defined "experimental_conditions"
ExpCondStrct = create_experimental_conditions_structure_elif(experimental_conditions);

% Here we interpolates our data at 10 Hz
if analysis_by_layer == true
    IntExpCondStrct = load_neuron_data10Hz_byLayer_elif(ExpCondStrct,pdatapath,
LAYER);

else
    IntExpCondStrct = load_neuron_data10Hz_elif(ExpCondStrct,pdatapath);
end

% Baseline calculation, dF/F and aggregation (trial average) of all selected ROI responses;
ROIresponses =
BASELINE_aggregate_ffall_means10Hz_BleedThruFix_elif(IntExpCondStrct,BASELINE);

%% Data rearrangement and mean across flies calculation

iRATE = 10; %rate at which data was interpolated
dur = size(ROIresponses.rats,2);
DURS = 5; % duration of the stimulus epoch (e.g. 5 sec for ON or OFF)
% We start defining matrices to work with. Cur_mat will have all
% the ROIs responses after aggregation (trial average).
cur_mat = ROIresponses.rats;
cur_IDs = ROIresponses.flyID;
cur_stims = ROIresponses.stims;
Stimulus_trace = cur_stims;
inds = ~isnan(sum(cur_mat,2));%Discards NaNs values in the dataset
cur_mat = cur_mat(inds,:);
cur_IDs = cur_IDs(inds);
cur_t = [1:size(cur_mat,2)]/iRATE;% Converts the time vector in seconds units

%Calculating means across flies. x > mean across ROIS per fly,
%m > mean across fly means, e > sem across fly means
[x_all,m_all,e_all] = mean_cat_elif(cur_mat,1,cur_IDs);

%% Epochs definition
switch NEURON_POLARITY
case 'ON'

```

```

        epoch_start = 51;
        epoch_end = 100;
    case 'OFF'
        epoch_start = 1;
        epoch_end = 50;
end

%% Outlier Analysis
%This filter gets rid of the the outliers
if outlier_filter && ~paired_data %The filter is apply if...
    % ...chosen by the user (outlier_filter = true)
    % ...and if the experiment condition is a control (defined as "not paired")

    ROI_mat = cur_mat;
    switch outlier_measure
        case 'Integral'
            outlier_variable = sum(ROI_mat(:,epoch_start:epoch_end),2);
        case 'Step'
            outlier_variable = max(ROI_mat(:,epoch_start:epoch_start+10),[],2);
        end

    inds_outliers = isoutlier(outlier_variable);
    inds_response_filter = find(~ inds_outliers);
    cur_mat = cur_mat(inds_response_filter,:);
    cur_IDs = cur_IDs(inds_response_filter);
end
%% Obtaining Mean, flyMeans, and Error
% For paired data, it loads the already existing information of its control
% condition in order to apply the same filters
if paired_data == true
    if NORMALIZE_ROI

load(['C:\MATLAB_FOLDER\2p\2p_pData\5secfff\NORMALIZED_DATA\','PAIRED_CONTROL','
\,LAYER], 'indices', 'indices_responding','indices_dF_F_Threshold','ROI_max_control');

        else
            load(['C:\MATLAB_FOLDER\2p\2p_pData\5secfff\','PAIRED_CONTROL','\,LAYER],
'indices', 'indices_responding','indices_dF_F_Threshold','final_mat','final_IDs');
            final_mat_control = final_mat;
            final_IDs_control = final_IDs;
        end

        final_mat = cur_mat(indices,:);
        final_IDs = cur_IDs(indices);

        % Applying the filters
        if size(indices,2) ~= size(indices_responding,2)
            final_mat = final_mat(indices_responding,:);
            final_IDs = final_IDs(indices_responding);
        end

        if ApplyPeakThreshold == true
            final_mat = final_mat(indices_dF_F_Threshold,:);
            final_IDs = final_IDs(:,indices_dF_F_Threshold);
        end

        if NORMALIZE_ROI
            final_mat_norm = final_mat./ROI_max_control; % Normalized by dividing by the max
responses for each ROI

```

```

    final_mat = final_mat_norm;
end

% Getting final means and errors for experimental conditions
% and its corresponding control
[x_final,m_final,e_final] = mean_cat_elife(final_mat,1,final_IDs);
[x_final_control,m_final_control,e_final_control] =
mean_cat_elife(final_mat_control,1,final_IDs_control);

% Normalization by control response
if NORMALIZE_FLY && paired_data %The normalization is apply if...
% ...chosen by the user (NORMALIZE_FLY = true)
% ...and if the experiment condition is paired with a control (defined as "paired_data")
% The data can be normalized to disctinc measurements:
% "Max" > Max response value along the trace
% "X_Step" > distance between mean of the values preceding
% the epoch and the max response during that epoch.
% "X_Integral" > sum of all values during that epoch.
switch NORMALIZATION_TYPE
case 'Max'
    Fly_max = max(x_final_control,[],2)*ones(1,length(x_final_control(1,:)));
    x_final_norm = x_final./Fly_max;
    e_final_norm = std(x_final_norm)/sqrt(size(x_final_norm,1));
case 'ON_Step'
    FlyOnStep = (abs(max(x_final_control(:,45:60),[],2)) +
abs(mean(x_final_control(:,40:50),2)))*ones(1,length(x_final_control(1,:)));
    x_final_norm = x_final./FlyOnStep;
    e_final_norm = std(x_final_norm)/sqrt(size(x_final_norm,1));
case 'OFF_Step'
    FlyOffStep = (abs(max(x_final_control(:,95:110),[],2)) +
abs(mean(x_final_control(:,90:100),2)))*ones(1,length(x_final_control(1,:)));
    x_final_norm = x_final./FlyOffStep;
    e_final_norm = std(x_final_norm)/sqrt(size(x_final_norm,1));
case 'ON_Integral'
    FlyOnIntegral =
sum(x_final_control(:,51:100),2)*ones(1,length(x_final_control(1,:)));
    x_final_norm = x_final./FlyOnIntegral;
    e_final_norm = std(x_final_norm)/sqrt(size(x_final_norm,1));
case 'OFF_Integral'
    FlyOffIntegral =
sum(x_final_control(:,1:50),2)*ones(1,length(x_final_control(1,:)));
    x_final_norm = x_final./FlyOffIntegral;
    e_final_norm = std(x_final_norm)/sqrt(size(x_final_norm,1));
end

end

% If the data is not defined as paired and it not going to be
% normalized to an existing control, the ROIs responses will pass
% the chosen filter by the user (See "USER INPUT" above)
else

[x,m,e,mat,IDs,inds,inds_responding,inds_notresponding,cur_mat_notresp,inds_peakThreshold
,ROI_max]...
    = fff_stimulus_response_filters_elife...

(cur_mat,cur_stims,cur_IDs,NEURON_POLARITY,stimulus_response_correlation_filter,ApplyT
hreshold_ON,...

```

```
Threshold_ON,Threshold_OFF,ApplyThreshold_OFF,ApplyPeakThreshold,Threshold_Peak,NO
RMALIZE_ROI,Apply_STD_filter);
```

```
x_final = x;
m_final = m;
e_final = e;
final_mat = mat;
final_IDs = IDs;
indices = inds;
indices_responding = inds_responding;
indices_dF_F_Threshold = inds_peakThreshold;
inds_NR = inds_notresponding;
cur_mat_NR = cur_mat_notresp;
ROI_max_control = ROI_max;
```

```
if NORMALIZE_FLY
    switch NORMALIZATION_TYPE
        case 'Max'
            Fly_max = max(x_final,[],2)*ones(1,length(x_final(1,:)));
            x_final_norm = x_final./Fly_max;
            e_final_norm = std(x_final_norm)/sqrt(size(x_final_norm,1));
        case 'ON_Step'
            FlyOnStep = (abs(max(x_final(:,45:60),[],2)) +
abs(mean(x_final(:,40:50),2)))*ones(1,length(x_final(1,:)));
            x_final_norm = x_final./FlyOnStep;
            e_final_norm = std(x_final_norm)/sqrt(size(x_final_norm,1));
        case 'OFF_Step'
            FlyOffStep = (abs(max(x_final(:,95:120),[],2)) +
abs(mean(x_final(:,90:100),2)))*ones(1,length(x_final(1,:)));
            x_final_norm = x_final./FlyOffStep;
            e_final_norm = std(x_final_norm)/sqrt(size(x_final_norm,1));
        case 'ON_Integral'
            FlyOnIntegral = sum(x_final(:,51:100),2)*ones(1,length(x_final(1,:)));
            x_final_norm = x_final./FlyOnIntegral;
            e_final_norm = std(x_final_norm)/sqrt(size(x_final_norm,1));
        case 'OFF_Integral'
            FlyOffIntegral = sum(x_final(:,1:50),2)*ones(1,length(x_final(1,:)));
            x_final_norm = x_final./FlyOffIntegral;
            e_final_norm = std(x_final_norm)/sqrt(size(x_final_norm,1));

    end
end
end
```

```
%% Quantification per Fly
% The following line calculates: Peak (Max response), Step, Plateau,
% Peak above plateau and integral for every fly:
```

```
% First, normalization by fly.
```

```
if NORMALIZE_FLY
```

```
% For OFF Step and Peak
```

```
preStimValue = mean(mean(x_final_norm(:,80:100),2));
postStimValue = mean(mean(x_final_norm(:,100:110),2));
```

```
if preStimValue > postStimValue % Evaluates if the signal is increasing or decreasing
```

```
FlyOffStep_norm = (abs(min(x_final_norm(:,100:110),[],2)) +
abs(mean(x_final_norm(:,95:100),2)))*-1;
```

```

        FlyOffPeak_norm = abs(min(x_final_norm(:,100:110),[],2))*-1;
    else
        FlyOffStep_norm = abs(max(x_final_norm(:,100:110),[],2)) +
abs(mean(x_final_norm(:,95:100),2));
        FlyOffPeak_norm = abs(max(x_final_norm(:,100:110),[],2));
    end

% For ON Step and Peak
    preStimValue = mean(mean(x_final_norm(:,30:50),2));
    postStimValue = mean(mean(x_final_norm(:,50:60),2));
    if preStimValue > postStimValue % Evaluates if the signal is increasing or decreasing
        FlyOnStep_norm = (abs(min(x_final_norm(:,50:60),[],2)) +
abs(mean(x_final_norm(:,45:50),2)))*-1;
        FlyOnPeak_norm = abs(min(x_final_norm(:,50:60),[],2))*-1;
    else
        FlyOnStep_norm = abs(max(x_final_norm(:,50:60),[],2)) +
abs(mean(x_final_norm(:,45:50),2));
        FlyOnPeak_norm = abs(max(x_final_norm(:,50:60),[],2));
    end

% For ON Plateau
    preStimValue = mean(mean(x_final_norm(:,30:50),2));
    postStimValue = mean(mean(x_final_norm(:,90:95),2));
    if preStimValue > postStimValue
        FlyOnPlateau_norm = (abs(mean(x_final_norm(:,90:95),2)) +
abs(mean(x_final_norm(:,45:50),2)))*-1;
    else
        FlyOnPlateau_norm = abs(mean(x_final_norm(:,90:95),2)) +
abs(mean(x_final_norm(:,45:50),2));
    end

% For OFF Plateau
    preStimValue = mean(mean(x_final_norm(:,80:100),2));
    postStimValue = mean(mean(x_final_norm(:,40:45),2));
    if preStimValue > postStimValue
        FlyOffPlateau_norm = (abs(mean(x_final_norm(:,40:45),2)) +
abs(mean(x_final_norm(:,90:95),2)))*-1;
    else
        FlyOffPlateau_norm = abs(mean(x_final_norm(:,40:45),2)) +
abs(mean(x_final_norm(:,90:95),2));
    end

%For Peaks above plateau
    FlyOnPeakAbovePlateau_norm = FlyOnStep_norm - FlyOnPlateau_norm;
    FlyOffPeakAbovePlateau_norm = FlyOffStep_norm - FlyOffPlateau_norm;

% For ON Integral responses
    FlyOnIntegral_norm = sum(x_final_norm(:,51:100),2);
    FlyOffIntegral_norm = sum(x_final_norm(:,1:50),2);
end

% Second, no normalization by fly.
% For OFF Step and Peak
    preStimValue = mean(mean(x_final(:,80:100),2));
    postStimValue = mean(mean(x_final(:,100:110),2));
    if preStimValue > postStimValue
        FlyOffStep = (abs(min(x_final(:,100:110),[],2)) + abs(mean(x_final(:,95:100),2)))*-
1;

```



```

        FlyOffPeak = abs(min(x_final(:,100:110),[],2))*-1;
    else
        FlyOffStep = abs(max(x_final(:,100:110),[],2)) + abs(mean(x_final(:,95:100),2));
        FlyOffPeak = abs(max(x_final(:,100:110),[],2));
    end

% For ON Step and Max
preStimValue = mean(mean(x_final(:,30:50),2));
postStimValue = mean(mean(x_final(:,50:60),2));
if preStimValue > postStimValue
    FlyOnStep = (abs(min(x_final(:,50:60),[],2)) + abs(mean(x_final(:,45:50),2)))*-1;
    FlyOnPeak = abs(min(x_final(:,50:60),[],2))*-1;
else
    FlyOnStep = abs(max(x_final(:,50:60),[],2)) + abs(mean(x_final(:,45:50),2));
    FlyOnPeak = abs(max(x_final(:,50:60),[],2));
end

% For ON Plateau
preStimValue = mean(mean(x_final(:,30:50),2));
postStimValue = mean(mean(x_final(:,90:95),2));
if preStimValue > postStimValue
    FlyOnPlateau = (abs(mean(x_final(:,90:95),2)) + abs(mean(x_final(:,45:50),2)))*-
1;
else
    FlyOnPlateau = abs(mean(x_final(:,90:95),2)) + abs(mean(x_final(:,45:50),2));
end

% For OFF Plateau
preStimValue = mean(mean(x_final(:,80:100),2));
postStimValue = mean(mean(x_final(:,40:45),2));
if preStimValue > postStimValue
    FlyOffPlateau = (abs(mean(x_final(:,40:45),2)) + abs(mean(x_final(:,90:95),2)))*-
1;
else
    FlyOffPlateau = abs(mean(x_final(:,40:45),2)) + abs(mean(x_final(:,90:95),2));
end

%For Peaks above plateau
FlyOnPeakAbovePlateau = FlyOnStep - FlyOnPlateau;
FlyOffPeakAbovePlateau = FlyOffStep - FlyOffPlateau;

% For Integrative Response
FlyOnIntegral = sum(x_final(:,51:100),2);
FlyOffIntegral = sum(x_final(:,1:50),2);

%% Plotting FLY MEAN and individual FLY traces

% plot all cells, mean across flies
f1 = figure(1); hold on
subplot(2,1,1);
cm=colormap('lines');
h2 = plot_err_patch_v2(cur_t,m_final,e_final,col1,col2);
title({gen_str, 'Mean by fly. Layer: ', LAYER});
axis('tight');

subplot(2,1,2);

```

```

plot(cur_t,x_final);

title(sprintf(['Individual fly means, N = %d ( %d )'],size(x_final,1),size(final_mat,1)))
axis('tight');
yLims=ylim;
set(gcf,'Color','w');
set(gca,'ytick',[0 : 0.5: 4]);
niceaxes;

%% Plotting ROIs
f2= figure(2); hold on;
plot(cur_t,final_mat);
title(['individual ROI means', gen_str, ' ' LAYER]);
axis('tight');
yLims=ylim;

line([DURS DURS],yLims,'color',[0 0 0],'linestyle','--');
line([0 DURS],[0 0],'color',[0 0 0]);
set(gcf,'Color','w');
niceaxes;

%% Plotting Normalized Data per Fly
if NORMALIZE_FLY && size(x_final_norm,1) >1
    f4= figure(4); hold on;
    subplot(2,1,1);
    h3 = plot_err_patch_v2(cur_t,mean(x_final_norm),e_final_norm,col1,col2);
    title({'Mean by Fly, Normalized to Control'; gen_str; LAYER});
    axis('tight');

    subplot(2,1,2);
    plot(cur_t,x_final_norm);

    title(sprintf(['Individual fly means, NORMALIZED to Control, N = %d ( %d
)'],size(x_final_norm,1),size(final_mat,1)));
    axis('tight');
    yLims=ylim;

    set(gcf,'Color','w');
    set(gca,'ytick',[0 : 0.5: 4]);
    niceaxes;

end

%% Bar Plotting FLY ON and OFF Steps
f3 = figure(3); hold on
for i = 1:4

    if i == 1
        ax = subplot(2,2,i);
        data1 = FlyOnStep';
        data2 = FlyOffStep';
        Step_str = cell(1,2);
        Step_str{1} = 'ON Step';
        Step_str{2} = 'OFF Step';
    elseif i == 2
        ax = subplot(2,2,i);
        data1 = FlyOnStep';
        data2 = FlyOnPlateau';

```

```

Step_str = cell(1,2);
Step_str{1} = 'ON Step';
Step_str{2} = 'ON Plateau';
elseif i == 3
    ax = subplot(2,2,i);
    data1 = FlyOffStep';
    data2 = FlyOffPlateau';
    Step_str = cell(1,2);
    Step_str{1} = 'OFF Step';
    Step_str{2} = 'OFF Plateau';
elseif i == 4
    ax = subplot(2,2,i);
    data1 = FlyOnIntegral';
    data2 = FlyOffIntegral';
    Step_str = cell(1,2);
    Step_str{1} = 'ON Integral';
    Step_str{2} = 'OFF Integral';
end

mean_data1 = mean(data1);
mean_data2 = mean(data2);
std_data1 = std(data1);
std_data2 = std(data2);
sem_data1 = std(data1)/sqrt(size(x_final,1));
sem_data2 = std(data2)/sqrt(size(x_final,1));
yData = [mean_data1 mean_data2];
stdData = [std_data1 std_data2];
semData = [sem_data1 sem_data2];
xData = [1, 2];

col3 = [49/256 130/256 189/256]; % dark blue
col4 = [158/256 202/256 225/256]; % light blue

b = bar(ax,xData,yData,'FaceColor',col1);
hold on;

xErrorData= [1, 2];
for i=1:length(xErrorData) % iterate over number of bar objects
    e2 = errorbar(xErrorData(i),yData(i),semData(i),'k. ');
    e2.LineWidth = 0.75;
end

sz = 5; % Scatter Plot
xData= [1, 2];

for i = 1:size(data1,2)-1
    xData = [xData; 1,2];
end

s4 = scatter(xData(:,1), data1,sz, 'filled');
s4.MarkerEdgeColor = 'k';
s4.MarkerFaceColor = col1;
hold on
s5 = scatter(xData(:,2), data2,sz, 'filled');
s5.MarkerEdgeColor = 'k';
s5.MarkerFaceColor = col1;

set(ax,'xticklabel',Step_str)

```

```

title({'Response'});
axis('tight');
end
subtitle (gen_str);

%% Bar Plotting FLY ON and OFF Steps NORMALIZED By Fly
if NORMALIZE_FLY && size(x_final_norm,1) >1
    f7 = figure(7); hold on
    for i = 1:4
        if i == 1
            ax = subplot(2,2,i);
            data1 = FlyOnStep_norm';
            data2 = FlyOffStep_norm';
            Step_str = cell(1,2);
            Step_str{1} = 'ON Step';
            Step_str{2} = 'OFF Step';
        elseif i == 2
            ax = subplot(2,2,i);
            data1 = FlyOnStep_norm';
            data2 = FlyOnPlateau_norm';
            Step_str = cell(1,2);
            Step_str{1} = 'ON Step';
            Step_str{2} = 'ON Plateau';
        elseif i == 3
            ax = subplot(2,2,i);
            data1 = FlyOffStep_norm';
            data2 = FlyOffPlateau_norm';
            Step_str = cell(1,2);
            Step_str{1} = 'OFF Step';
            Step_str{2} = 'OFF Plateau';
        elseif i == 4
            ax = subplot(2,2,i);
            data1 = FlyOnIntegral_norm';
            data2 = FlyOffIntegral_norm';
            Step_str = cell(1,2);
            Step_str{1} = 'ON Integral';
            Step_str{2} = 'OFF Integral';
        end

        mean_data1 = mean(data1);
        mean_data2 = mean(data2);
        std_data1 = std(data1);
        std_data2 = std(data2);
        sem_data1 = std(data1)/sqrt(size(x_final_norm,1));
        sem_data2 = std(data2)/sqrt(size(x_final_norm,1));
        yData = [mean_data1 mean_data2];
        stdData = [std_data1 std_data2];
        semData = [sem_data1 sem_data2];
        xData = [1, 2];

        col3 = [49/256 130/256 189/256]; % dark blue
        col4 = [158/256 202/256 225/256]; % light blue

        b = bar(ax,xData,yData,'FaceColor',col1);
        hold on;

        xErrorData = [1, 2];
        for i=1:length(xErrorData) % iterate over number of bar objects

```

```

        e2 = errorbar(xErrorData(i),yData(i),semData(i),'k. ');
        e2.LineWidth = 0.75;
    end

    sz = 5; % Scatter Plot
    xData= [1, 2];

    for i = 1:size(data1,2)-1
        xData = [xData; 1,2];
    end

    s4 = scatter(xData(:,1), data1,sz, 'filled');
    s4.MarkerEdgeColor = 'k';
    s4.MarkerFaceColor = col1;
    hold on
    s5 = scatter(xData(:,2), data2,sz, 'filled');
    s5.MarkerEdgeColor = 'k';
    s5.MarkerFaceColor = col1;

    set(ax,'xticklabel',Step_str)
    title({'Normalized by Control Fly'});
    axis('tight');
end
end
subtitle (gen_str);

```

%% Plotting FLY MEANs BEFORE AND AFTER applying filters

```

% plot all cells, mean across flies
f5=figure(5); hold on
subplot(2,1,1);
cm=colormap('lines');
h2 = plot_err_patch_v2(cur_t,m_final,e_final,col1,col2); hold on;
plot(cur_t,x_final);
title({gen_str ; 'Mean by fly AFTER Threshold. Layer: ' ; LAYER})
plot(cur_t, round(mean(ROIresponses.stims))*0.5 + 1)
axis('tight');
yLims=ylim;
set(gcf,'Color','w');
set(gca,'ytick',[0 : 0.5: 4]);
niceaxes;

subplot(2,1,2);
cm=colormap('lines');
h2 = plot_err_patch_v2(cur_t,m_all,e_all,col1,col2); hold on;
plot(cur_t,x_all);
title({gen_str ; 'Mean by fly BEFORE Threshold. Layer: ' ; LAYER})
plot(cur_t, round(mean(ROIresponses.stims))*0.5 + 1)
axis('tight');
yLims=ylim;
set(gcf,'Color','w');
set(gca,'ytick',[0 : 0.5: 4]);
niceaxes;

```

%% Plotting All ROIs BEFORE AND AFTER applying filters

```

% plot all cells, mean across flies
f6=figure(6); hold on

```

```

subplot(2,1,1);
plot(cur_t,cur_mat);
title({'# of ROI BEFORE Threshold'; gen_str; LAYER; size(cur_mat,1)});
axis('tight')
yLims=yLim;

```

```

line([DURS DURS],yLims,'color',[0 0 0],'linestyle','--');
line([0 DURS],[0 0],'color',[0 0 0]);
set(gcf,'Color','w');
niceaxes;

```

```

subplot(2,1,2);
plot(cur_t,final_mat);
title({'# of ROI AFTER Threshold'; gen_str; LAYER;size(final_mat,1)});
axis('tight')
yLims=yLim;

```

```

line([DURS DURS],yLims,'color',[0 0 0],'linestyle','--');
line([0 DURS],[0 0],'color',[0 0 0]);
set(gcf,'Color','w');
niceaxes;

```

%% Saving Data

```

if save_data
    saveInFolder = [save_in_folder,GENOTYPE,'\',LAYER];
    if NORMALIZE_ROI
        cd('C:\MATLAB_FOLDER\2p\2p_pData\5secff\NORMALIZED_DATA')
        allFolders = dir;
        listing = dir(GENOTYPE);
        if isempty(listing)
            mkdir(GENOTYPE)
        end
        saveInFolder =
['C:\MATLAB_FOLDER\2p\2p_pData\5secff\NORMALIZED_DATA\',GENOTYPE,'\ ',LAYER];
        save(saveInFolder, 'FlyOnStep','FlyOffStep','FlyOnPlateau','FlyOffPlateau',
'FlyOnPeak','FlyOffPeak'...
            , 'final_mat','final_IDs','indices','indices_responding','Stimulus_trace'...
            , 'indices_dF_F_Threshold','ROI_max_control');
        cd(['C:\MATLAB_FOLDER\2p\2p_pData\5secff\NORMALIZED_DATA\',GENOTYPE])
        saveas(f1,[LAYER,'_5sfff_Normalized.pdf'])
        saveas(f2,[LAYER,'_ROIs_Normalized.pdf'])
        saveas(f3,[LAYER,'_Steps_Normalized.pdf'])
    else

        cd(save_in_folder);
        allFolders = dir;
        listing = dir(GENOTYPE);
        if isempty(listing)
            mkdir(GENOTYPE)
        end

        if NORMALIZE_FLY
            if strcmp(NORMALIZATION_TYPE(end-4:end),'egral')

save(saveInFolder, 'FlyOffIntegral','FlyOffIntegral_norm','FlyOnIntegral_norm','FlyOnIntegral','-
append');

```

```

cd([save_in_folder,GENOTYPE])
try
    saveas(f7,[LAYER,'_Integral_NomalizedByFlies.pdf'])
catch
    disp('Normalized Data was not saved');
end
else

save(saveInFolder,'FlyOnIntegral','FlyOffIntegral','FlyOnPeak','FlyOnPeak_norm','FlyOffPeak','FlyOffPeak_norm','FlyOnStep','FlyOnStep_norm','FlyOffStep','FlyOffStep_norm','FlyOnPlateau','FlyOnPlateau_norm','FlyOffPlateau','FlyOffPlateau_norm','FlyOnPeak','FlyOffPeak','FlyOnPeakAbovePlateau','FlyOffPeakAbovePlateau','FlyOnPeakAbovePlateau_norm','FlyOffPeakAbovePlateau_norm','final_mat','final_IDs','indices','indices_responding','Stimulus_trace','indices_dF_F_Threshold','x_final','e_final','m_final','x_final_norm','e_final_norm');
cd([save_in_folder,GENOTYPE])
saveas(f1,[LAYER,'_5sfff.pdf'])
saveas(f2,[LAYER,'_ROIs.pdf'])
saveas(f3,[LAYER,'_Steps.pdf'])
try
    saveas(f4,[LAYER,'_5sfff_NomalizedByFlies.pdf'])
    saveas(f7,[LAYER,'_Steps_NomalizedByFlies.pdf'])
catch
    disp('Normalized Data was not saved');
end
end
else

save(saveInFolder,'FlyOffIntegral','FlyOnIntegral','FlyOnStep','FlyOffStep','FlyOnPeak','FlyOffPeak','FlyOnPlateau','FlyOffPlateau','FlyOnPeak','FlyOffPeak','FlyOnPeakAbovePlateau','FlyOffPeakAbovePlateau','final_mat','final_IDs','indices','indices_responding','Stimulus_trace','indices_dF_F_Threshold','x_final','e_final','m_final');
cd([save_in_folder,GENOTYPE])
saveas(f1,[LAYER,'_5sfff.pdf'])
saveas(f2,[LAYER,'_ROIs.pdf'])
saveas(f3,[LAYER,'_Steps.pdf'])
end

end

end

fprintf([gen_str,' N = %d ( %d )'],size(x_final,1),size(final_mat,1));
end

```

---



---

## Fff analysis-related script

Script name: data\_base\_select\_samples\_elife.m

%Script to read in database (txt file) and make various categories for

%specific experimental conditions. It needs as an input the  
%MASTER\_oldersummary txt file where all data summary is stored.

%% Reading the data base

pdatapath=('C:\MATLAB\_FOLDER\2p\2p\_pData'); % Path where the pData files are. (pData  
files contains all the raw data per ROI)

cd(pdatapath);

data\_base\_name = 'MASTER\_foldersummary\_Seb.txt'; % The file needs to be saved in the  
"pdatapath"

```
[fname,datetime,frames,zdepth,tottime,stimbouts,locnum,...  
activecells,inverted,stimcode,quality,driver,...  
moving,layer,wavelength,flyID, responsively, condition1, condition2, condition3]...  
=textread(data_base_name,...  
'%s %s %f %f %f %f %s %f %s %f %s %f %s %f %f %s %s %s \r',...  
'headerlines',1,'delimiter','t');
```

%% Stimulus Codes

% Creating variable for different stimuli. The stimulus names are in the  
% "stimcode" column in the data base txt file

% ON - OFF full field flashes:

i\_fff5s =

strcmpt('LocalCircle\_5sec\_220deg\_0degAz\_0degEI\_Sequential\_LumDec\_LumInc',(stimcode));

% Moving Edges:

i\_drifting\_edge\_20degps\_Rand8DIR\_IncDec\_opt =

strcmpt('DriftingEdge\_LumDecLumInc\_1period\_20degPerSec\_90deg\_BlankRand\_8Dirs\_optimi  
zed',(stimcode));

%% Genotypes

% Creating variable for different genotypes. The genotypes names are in the  
% "driver" column in the data base txt file

% Medulla neurons expressing iGluSnFR

i\_Mi1\_809\_SplitGal4\_UAS\_iGluSnFR\_A =

strcmpt('Mi1\_809\_SplitGal4\_UAS\_iGluSnFR\_A',driver);

i\_Tm3\_300\_SplitGal4\_UAS\_iGluSnFR\_A =

strcmpt('Tm3\_300\_SplitGal4\_UAS\_iGluSnFR\_A',driver);

% -----Lamina neurons-----

i\_L1\_c202\_Gal4\_UAS\_GCaMP6f = strcmpt('L1\_c202\_Gal4\_UAS\_GCaMP6f',driver);

% -----Medulla neurons-----

% Mi1

i\_Mi1\_809\_SplitGal4\_UAS\_GCaMP6f = strcmpt('Mi1\_809\_SplitGal4\_UAS\_GCaMP6f',driver);

% GluCla dsRNA knock down

i\_Mi1\_809\_UAS\_RNAi\_GluCla\_UAS\_GCaMP6f =

strcmpt('Mi1\_809\_UAS\_RNAi\_GluCla\_UAS\_GCaMP6f',driver);

i\_Mi1\_809\_UAS\_GCaMP6f\_UAS\_tdTom =

strcmpt('Mi1\_809\_UAS\_GCaMP6f\_UAS\_tdTom',driver);

% GluCla cell type-specific loss of function

i\_Mi1\_UAS\_Flp\_UAS\_GCaMP6f\_GluClalphaFlpSTOP\_DfED6025 =

strcmpt('Mi1\_809\_SplitGal4\_UAS\_Flp\_UAS\_GCaMP6f\_GluClalphaFlpSTOP\_DfED6025\_',driver  
);



```
i_Mi1_HeterozygousControl_UAS_GCaMP6f_GluClalphaFlpSTOP =
strcmpt('Mi1_809_SplitGal4_HeterozygousControl_UAS_GCaMP6f_GluClalphaFlpSTOP_',driver);
i_Mi1_NoFlp_UAS_GCaMP6f_GluClalphaFlpSTOP_DfED6025 =
strcmpt('Mi1_809_SplitGal4_NoFlpControl_UAS_GCaMP6f_GluClalphaFlpSTOP_DfED6025_',driver);
```

#### % GluClα full loss of function

```
i_Mi1_LexA_LexAop_GCaMP6f_DfED6025_GluClαFlpD =
strcmpt('Mi1_LexA_LexAop_GCaMP6f_DfED6025_GluClα.Flp.D',driver);
i_Mi1_LexA_LexAop_GCaMP6f_GluClαFlpD =
strcmpt('Mi1_LexA_LexAop_GCaMP6f_GluClα.Flp.D_+',driver);
i_Mi1_LexA_LexAop_GCaMP6f_DfED6025 =
strcmpt('Mi1_LexA_LexAop_GCaMP6f_DfED6025_+',driver);
```

#### % GluClα S278T rescue experiment

```
i_Mi1_LexA_LexAop_GCaMP6f_GluClαS278T =
strcmpt('Mi1_LexA_LexAop_GCaMP6f_GluClαS278T_+',driver);
i_Mi1_LexA_LexAop_GCaMP6f_GluClαS278T_DfED6025 =
strcmpt('Mi1_LexA_LexAop_GCaMP6f_GluClαS278T_DfED6025_',driver);
```

#### % Rdl MDRR rescue experiment

```
i_Mi1_LexA_UAS_GCaMP6f_Rdl1_RdlMDRR =
strcmpt('Mi1_LexA_UAS_GCaMP6f_RDL1+RDLMDR',driver);
i_Mi1_LexA_UAS_GCaMP6f_Rdl1 =
strcmpt('Mi1_LexA_LexAopGCaMP6f_RDL1background',driver);
```

#### %Tm3

```
i_Tm3_300_SplitGal4_UAS_GCaMP6f = strcmpt('Tm3_300_SplitGal4_UAS_GCaMP6f',driver);
```

#### % GluClα dsRNA knock down

```
i_Tm3_300_UAS_RNAi_GluClα_UAS_GCaMP6f =
strcmpt('Tm3_300_UAS_RNAi_GluClα_UAS_GCaMP6f',driver);
i_Tm3_300_UAS_GCaMP6f_UAS_tdTom =
strcmpt('Tm3_300_UAS_GCaMP6f_UAS_tdTom',driver);
```

#### % GluClα full loss of function

```
i_Tm3_LexA_LexAop_GCaMP6f_DfED6025_GluClαFlpD =
strcmpt('Tm3_LexA_LexAop_GCaMP6f_Df_GluClα.Flp.D',driver);
i_Tm3_LexA_LexAop_GCaMP6f_GluClαFlpD =
strcmpt('Tm3_LexA_LexAop_GCaMP6f_GluClα.Flp.D_+',driver);
i_Tm3_LexA_LexAop_GCaMP6f_DfED6025 =
strcmpt('Tm3_LexA_LexAop_GCaMP6f_DfED6025_+',driver);
```

#### % GluClα S278T rescue experiment

```
i_Tm3_LexA_LexAop_GCaMP6f_GluClαS278T =
strcmpt('Tm3_LexA_LexAop_GCaMP6f_GluClαS278T_+',driver);
i_Tm3_LexA_LexAop_GCaMP6f_GluClαS278T_DfED6025 =
strcmpt('Tm3_LexA_LexAop_GCaMP6f_GluClαS278T_DfED6025_',driver);
```

#### % Rdl MDRR rescue experiment

```
i_Tm3_LexA_LexAop_GCaMP6f = strcmpt('Tm3_LexA_LexAop_GCaMP6f',driver);
i_Tm3_LexA_LexAop_GCaMP6f_RdlMDRR =
strcmpt('Tm3_LexA_LexAop_GCaMP6f_RdlMDRR',driver);
```

#### % -----Lobula complex neurons-----

#### %T4/T5

```
i_T4_T5_LexA_LexAop_GCaMP6f_28rec =
strcmpt('T4_T5_LexA_LexAop_GCaMP6f_28rec',driver);
```

% GluCla full loss of function

```
i_T4_T5_LexA_LexAop_GCaMP6f_28rec_GluClalphaFlpSTOP_DfED6025=  
strcmpi('T4_T5_LexA_LexAop_GCaMP6f_28rec_Df_GluCla.Flp.D',driver);  
i_T4_T5_LexA_LexAop_GCaMP6f_28rec_GluClalphaFlpSTOP =  
strcmpi('T4_T5_LexA_LexAop_GCaMP6f_28rec_GluCla.Flp.D_+',driver);  
i_T4_T5_LexA_LexAop_GCaMP6f_28rec_DfED6025 =  
strcmpi('T4_T5_LexA_LexAop_GCaMP6f_28rec_DfED6025_+',driver);
```

% GluCla S278T rescue experiment

```
i_T4_T5_LexA_LexAop_GCaMP6f_28rec_GluClaS278T =  
strcmpi('T4_T5_LexA_LexAop_GCaMP6f_28rec_GluClaS278T_+',driver);  
i_T4_T5_LexA_LexAop_GCaMP6f_28rec_GluClaS278T_DfED6025 =  
strcmpi('T4_T5_LexA_LexAop_GCaMP6f_rec28_GluClaS278T_DfED6025_',driver);
```

%% Experimentals Conditions

% Creating variable for different conditions. The conditions names are in the  
% "condition" columns in the data base txt file

% Condition 1

```
i_Control = strcmpi('Control', condition1);  
i_PTX_Control = strcmpi('PTX_Control', condition1);  
i_PTX_0uM = strcmpi('PTX_0uM', condition1);  
i_PTX_0_5uM = strcmpi('PTX_0.5uM', condition1);  
i_PTX_1uM = strcmpi('PTX_1uM', condition1);  
i_PTX_2_5uM = strcmpi('PTX_2.5uM', condition1);  
i_PTX_5uM = strcmpi('PTX_5uM', condition1);  
i_PTX_25uM = strcmpi('PTX_25uM', condition1);  
i_PTX_50uM = strcmpi('PTX_50uM', condition1);  
i_PTX_100uM = strcmpi('PTX_100uM', condition1);  
i_MPEP_Control = strcmpi('MPEP_Control', condition1);  
i_MPEP_100uM = strcmpi('MPEP_100uM', condition1);
```

% Condition 2

```
i_Exp1 = strcmpi('Exp1_', condition2);  
i_Exp2 = strcmpi('Exp2_', condition2);  
i_Common1 = strcmpi('Common1_', condition2);
```

% Condition 3

```
i_PTX_exp_0uM = strcmpi('PTX_exp_0uM', condition3);  
i_PTX_exp_0_5uM = strcmpi('PTX_exp_0.5uM', condition3);  
i_PTX_exp_1uM = strcmpi('PTX_exp_1uM', condition3);  
i_PTX_exp_2_5uM = strcmpi('PTX_exp_2.5uM', condition3);  
i_PTX_exp_5uM = strcmpi('PTX_exp_5uM', condition3);  
i_PTX_exp_25uM = strcmpi('PTX_exp_25uM', condition3);  
i_PTX_exp_50uM = strcmpi('PTX_exp_50uM', condition3);  
i_PTX_exp_100uM = strcmpi('PTX_exp_100uM', condition3);  
i_PTX_exp_0_50uM = strcmpi('PTX_exp_0_50uM', condition3);  
i_PTX_exp_5_100uM = strcmpi('PTX_exp_5_100uM', condition3);
```

```
i_MPEP_exp_100uM = strcmpi('MPEP_exp_100uM', condition3);  
i_GluCla_RNAi_exp = strcmpi('GluCla_RNAi_exp', condition3);
```

```
i_GluCla_FlpSTOP_exp = strcmpi('GluCla_FlpSTOP_exp', condition3);  
i_GluCla_KD_exp = strcmpi('GluCla_KD_exp', condition3);  
i_GluCla_KO_exp = strcmpi('GluCla_KO_exp', condition3);
```

---

---

## Fff analysis-related script

Script name: load\_genotypes\_conditions\_elife.m

% The function loads the experimental conditions listed in a txt file.

% It creates a list of booleans for each condition variable. It needs as an input a txt file (Genotype\_List.txt) with the different the genotype conditions

```
function [GENOTYPE, PAIRED_CONTROL, UseControlIDs, byLayer, LAYER, ...  
    ApplyThreshold_ON, Threshold_ON, ApplyThreshold_OFF, Threshold_OFF, ...  
    ApplyPeakThreshold, Threshold_Peak, BASELINE, NORMALIZE_ROI, NORMALIZE_FLY, ...
```

```
NORMALIZATION_TYPE, NEURON_POLARITY, CorrelationValue, experimental_conditions, App  
ly_STD_filter]...
```

```
=load_genotype_conditions_elife(Automatized, GENOTYPE, PAIRED_CONTROL, UseControlID  
s, byLayer, LAYER, ...  
    ApplyThreshold_ON, Threshold_ON, ApplyThreshold_OFF, Threshold_OFF, ...  
    ApplyPeakThreshold, Threshold_Peak, BASELINE, NORMALIZE_ROI, NORMALIZE_FLY, ...  
    NORMALIZATION_TYPE, NEURON_POLARITY, CorrelationValue, Apply_STD_filter)
```

```
if Automatized
```

```
    disp('----- Automatized Analysis MODE -----')
```

```
    pdatapath=('C:\MATLAB_FOLDER\2p\2p_pData');
```

```
    cd(pdatapath);
```

```
    [GENOTYPE, PAIRED_CONTROL, UseControlIDs, byLayer, LAYER, ...
```

```
        ApplyThreshold_ON, Threshold_ON, ApplyThreshold_OFF, Threshold_OFF, ...
```

```
        ApplyPeakThreshold, Threshold_Peak, BASELINE, NORMALIZE_ROI, NORMALIZE_FLY, ...
```

```
NORMALIZATION_TYPE, NEURON_POLARITY, CorrelationValue, experimental_conditions, App  
ly_STD_filter]=textread('Genotype_List.txt', '%s %s %s %s %s %s %f %s %f %s %f %s %s %s  
%s %s %f %s %s %s \r', 'headerlines', 1, 'delimiter', '\t');
```

```
% Transforming all logical strings to logicals
```

```
UseControlIDs = strcmpi(UseControlIDs, 'true');
```

```
byLayer = strcmpi(byLayer, 'true');
```

```
ApplyThreshold_ON = strcmpi(ApplyThreshold_ON, 'true');
```

```
ApplyThreshold_OFF = strcmpi(ApplyThreshold_OFF, 'true');
```

```
ApplyPeakThreshold = strcmpi(ApplyPeakThreshold, 'true');
```

```
Apply_STD_filter = strcmpi(Apply_STD_filter, 'true');
```

```
NORMALIZE_ROI = strcmpi(NORMALIZE_ROI, 'true');
```

```
NORMALIZE_FLY = strcmpi(NORMALIZE_FLY, 'true');
```

```
else
```

```
    disp('----- Not Automatized Analysis MODE -----');
```

```
    experimental_conditions = [];
```

```
end
```

---

---

## Fff analysis-related script

Script name: create\_experimental\_conditions\_structure\_elife.m

% This function loads the pData files for a particular experimental  
% condition

```

function out=create_experimental_conditions_structure_elife(inds)
% Takes indices you want to analyze as input inds

% Reads the masterfolder and separates the different categories

[fname,datetime,frames,zdepth,tottime,stimbouts,locnum,...
 activecells,inverted,stimcode,quality,driver,...
 moving,layer,wavelength,flyID, responsively, condition1, condition2, condition3]...
=textread('MASTER_foldersummary_Seb.txt',...
 '%s %s %f %f %f %f %f %f %s %f %s %f %s %f %f %f %s %s %s \r',...
 'headerlines',1,'delimiter','t');

out=[];

count=1;
for ii=1:length(inds) %Will iterate for all the indices
    if exist(fname{inds(ii)}) %If the index has a file name fname
        x=load(fname{inds(ii)}); %Load the fname of that index
        try
            ns=[1:size(x.strct.dRatio,1)]; %put dRatio in ns variable for all ROIs
        catch
            ns=[1:size(x.strct.dRatio1,1)]; %put dRatio1 in ns variable for all ROIs
        end
        for jj=1:length(ns) %For each ROI in that pData file
            out(count).name=fname{inds(ii)}; % Put the fname in the output structure
            out(count).cell=ns(jj); %Create a cell for that output index and put each ROIs dRatio
            count=count+1;
        end
    end
end
end

```

---

## Fff analysis-related script

Script name: load\_neuron\_data10Hz\_byLayer\_elife.m

% This function figures out,among all recorded ROIs, which ROI belongs  
 % to a specific layer. The identification number of each ROIs in each layer  
 % is specified in the "layer" column of the masterfolder txt file. For all  
 % selected ROIs, important information is extracted and created. E.g. the stimulus and  
 % response time vectors are generated and  
 % extrapolated to 10 Hz.

```

function out=load_neuron_data10Hz_byLayer_elife(in,locdir, layerTypeWanted)

```

% Reads the masterfolder and separates the different categories

```

[fname,datetime,frames,zdepth,tottime,stimbouts,locnum,...
 activecells,inverted,stimcode,quality,driver,...
 moving,layer,wavelength,flyID, responsively, condition1, condition2, condition3]...
=textread('MASTER_foldersummary_Seb.txt',...
 '%s %s %f %f %f %f %f %f %s %f %s %f %s %f %f %f %s %s %s \r',...
 'headerlines',1,'delimiter','t');

```

```

currdir=pwd;
cd(locdir);

```

```

count=1;
for ii=1:length(in) % all the presentations of the correct stimulus by ROI
    qq=in(ii).cell; % which ROI 'cell' we are currently on.
    ss=strcmpi(in(ii).name,fname); % logical that tells you which LDM out of all of them we are
    currently on.
    if exist(in(ii).name) * (qq>0)
        x=load(in(ii).name); % open that data file
        currLayerInfo=layer{ss};
        % now use this info to determine if the current "cell" value stored
        % in qq matches any of the numbers that follow the "layer" that
        % we want e.g. LPA 1:5
        str_i_layer=strfind(currLayerInfo, layerTypeWanted); % gives you the first location of
        "layerTypeWanted" in "currLayerInfo"

        if(~isempty(str_i_layer))
            str_start= str_i_layer + length(layerTypeWanted)-1;
            i=str_start; % index one before where the numbers will start

            while(true)
                i=i+1;

                if(isletter(currLayerInfo(i))) % a letter denotes next layer "label tag"
                    break;
                end

                if(i==length(currLayerInfo)) % end of the layer string
                    i=i+1; % this is the last number so step one more to get the indexing to include it...
                    break;
                end
            end

            end
            %Identification numbers of the ROI's that we want the data from
            layersToUse=str2num(currLayerInfo(str_start+1:i-1));

            if(isfield(x.strct,'dSignal2')) % For two channel imaging
                x.strct.dRatio1 = x.strct.dSignal2;
            else
                (isfield(x.strct,'dSignal1'));% For one channel imaging
                x.strct.dRatio1 = x.strct.dSignal1;
            end

            if qq<=size(x.strct.dRatio1,1) && sum(layersToUse==qq) % Variables for the current
            ROI are stored if...
                % ...this ROI is within the "layerTypeWanted" list of number of ROIs recorded
                % ...and if this ROI was listed within the wanted layer.
                out(count).stimcode=stimcode{ss};
                out(count).quality=quality{ss};
                out(count).driver=driver{ss};
                out(count).layer=layer{ss};
                out(count).wavelength=wavelength{ss};
                out(count).flyID=flyID{ss};
                out(count).name=in(ii).name;
                out(count).cell=in(ii).cell;
                try
                    out(count).zlayer = x.strct.layer;
                catch
                    disp(sprintf('This pData: %s does not have (z)layer information', out(count).name));
                end
                out(count).xml=x.strct.xml;
            end
        end
    end
end

```

```

out(count).ratio=x.strct.dRatio1(qq,:);
out(count).stim = x.strct.fstimval;
out(count).raw_stim = x.strct.ch3;
out(count).avrstimval = x.strct.avrstimval;
out(count).frame_nums = x.strct.frame_nums;
fps=x.strct.xml.framerate;
out(count).t=[1:length(out(count).ratio)]/fps; %Here we generate the time vector:
frames / framerate
out(count).it=[0.5/fps:0.1:(length(out(count).ratio)+0.5)/fps]; %New time vector for
interpolation at 10Hz (0.1), starts and ends with 0.5/fps shift

%Nearest neighbor interpolation for the stimulus (should maintain discrete values) of
.stim (at 10Hz)
out(count).istim=interp1(out(count).t,out(count).stim,out(count).it,'nearest','extrap');

%Linear interpolation for the response/signal (ratio)
out(count).iratio=interp1(out(count).t,out(count).ratio,out(count).it,'linear','extrap');

% Added stimpos and centers interp1 is based on the length of out.t
if(isfield(x.strct,'fstimpos1'))

out(count).ifstimpos1=interp1(out(count).t,x.strct.fstimpos1,out(count).it,'nearest','extrap');

out(count).ifstimpos2=interp1(out(count).t,x.strct.fstimpos2,out(count).it,'nearest','extrap');

end

if(isfield(x.strct,'cell_nums'))
out(count).ref_cell_num = x.strct.cell_nums(qq);
end
count=count+1;
end
else
disp('No layer information for this fly:'); % Message to be displayed if the layer
information was not found for a specific fly
in(ii).name
layersToUse= [1:length(x.strct.masks)]; % If no layer, it takes all selected ROIs and does
the same analysis (see above)

if(isfield(x.strct,'dSignal2'))
x.strct.dRatio1 = x.strct.dSignal2;
else
(isfield(x.strct,'dSignal1'));
x.strct.dRatio1 = x.strct.dSignal1;
end

if qq<=size(x.strct.dRatio1,1) && sum(layersToUse==qq)
out(count).stimcode=stimcode{ss};
out(count).quality=quality{ss};
out(count).driver=driver{ss};
out(count).layer=layer{ss};
out(count).wavelength=wavelength{ss};
out(count).flyID=flyID{ss};
out(count).name=in(ii).name;
out(count).cell=in(ii).cell;
try
out(count).zlayer = x.strct.layer;

```

```

catch
    disp(sprintf('This pData: %s does not have (z)layer information', out(count).name));
end
out(count).xml=x.strct.xml;
out(count).ratio=x.strct.dRatio1(qq,:);
out(count).stim = x.strct.fstimval;
out(count).raw_stim = x.strct.ch3;
out(count).avrstimval = x.strct.avrstimval;
out(count).frame_nums = x.strct.frame_nums;
fps=x.strct.xml.framerate;
out(count).t=[1:length(out(count).ratio)]/fps;
out(count).it=[0.5/fps:0.1:(length(out(count).ratio)+0.5)/fps];
out(count).istim=interp1(out(count).t,out(count).stim,out(count).it,'nearest','extrap');
out(count).iratio=interp1(out(count).t,out(count).ratio,out(count).it,'linear','extrap');

if(isfield(x.strct,'fstimpos1'))

out(count).ifstimpos1=interp1(out(count).t,x.strct.fstimpos1,out(count).it,'nearest','extrap');

out(count).ifstimpos2=interp1(out(count).t,x.strct.fstimpos2,out(count).it,'nearest','extrap');

end

if(isfield(x.strct,'centers'))
    out(count).center=x.strct.centers(qq,:);
end

if(isfield(x.strct,'barResponse'))
    out(count).barResponse=x.strct.barResponse(qq);
end

if(isfield(x.strct,'cell_nums'))
    out(count).ref_cell_num = x.strct.cell_nums(qq);
end
count=count+1;
end
end

else
    disp([in(ii).name ' unfound -- skipping']);
end
end

cd(currd);
-----

```

## Fff analysis-related script

Script name: load\_neuron\_data10Hz\_elife.m

% For all selected ROIs, important information is extracted and created. E.g. the stimulus and response time vectors are generated and  
 % extrapolated to 10 Hz.

function out=load\_neuron\_data10Hz\_elife(in,locdir)

[fname,datetime,frames,zdepth,tottime,stimbouts,locnum,...

```

activecells,inverted,stimcode,quality,driver,...
moving,layer,wavelength,flyID, responsively, condition1, condition2, condition3]...
=textread('MASTER_foldersummary_Seb.txt',...
'%s %s %f %f %f %f %f %s %f %s %f %s %f %f %s %s %s \r',...
'headerlines',1,'delimiter','t');

currd=pwd;
cd(locdir);

count=1;
for ii=1:length(in)
    ii
    qq=in(ii).cell;
    ss=strcmpi(in(ii).name,fname);
    if exist(in(ii).name) * (qq>0)
        x=load(in(ii).name);
        if (isfield(x.strct,'dRatio'))
            x.strct.dRatio1 = x.strct.dRatio;
        end
        if qq<=size(x.strct.dRatio1,1) % Variables for the current ROI are stored
            out(count).stimcode=stimcode{ss};
            out(count).quality=quality{ss};
            out(count).driver=driver{ss};
            out(count).layer=layer{ss};
            out(count).wavelength=wavelength{ss};
            out(count).flyID=flyID{ss};
            out(count).name=in(ii).name;
            out(count).cell=in(ii).cell;
            try
                out(count).zlayer = x.strct.layer;
            catch
                disp(fprintf('This pData: %s does not have (z)layer information', out(count).name));
            end
            out(count).xml=x.strct.xml;
            out(count).ratio=x.strct.dRatio1(qq,:);
            out(count).stim = x.strct.fstimval;
            out(count).raw_stim = x.strct.ch3;
            out(count).avrstimval = x.strct.avrstimval;
            out(count).frame_nums = x.strct.frame_nums;
            fps=x.strct.xml.framerate;
            out(count).t=[1:length(out(count).ratio)]/fps; %Here we generate the time vector:
frames / framerate
            out(count).it=[0.5/fps:0.1:(length(out(count).ratio)+0.5)/fps]; %New time vector for
interpolation at 10Hz (0.1), starts and ends with 0.5/fps shift

            %Nearest neighbor interpolation for the stimulus (should maintain discrete values) of
.stim (at 10Hz)
            out(count).istim=interp1(out(count).t,out(count).stim,out(count).it,'nearest','extrap');

            %Linear interpolation for the response/signal (ratio)
            out(count).iratio=interp1(out(count).t,out(count).ratio,out(count).it,'linear','extrap');

            % Added stimpos and centers interp1 is based on the length of out.t
            if(isfield(x.strct,'fstimpos1'))

out(count).ifstimpos1=interp1(out(count).t,x.strct.fstimpos1,out(count).it,'nearest','extrap');

```



```
out(count).fstimpos2=interp1(out(count).t,x.strct.fstimpos2,out(count).it,'nearest','extrap');
```

```
end
```

```
if(isfield(x.strct,'cell_nums'))
```

```
    out(count).ref_cell_num = x.strct.cell_nums(qq);
```

```
end
```

```
count=count+1;
```

```
else
```

```
    disp([in(ii).name ': cell out of bounds...']);
```

```
end
```

```
else
```

```
    disp([in(ii).name ' unfound -- skipping']);
```

```
end
```

```
end
```

```
cd(currd);
```

---

## Fff analysis-related script

Script name: BASELINE\_aggregate\_fffall\_means10Hz\_BleedThruFix\_elife.m

% This function calculates the baseline for dF/F calculation

```
function out = BASELINE_aggregate_fffall_means10Hz_BleedThruFix_elife(in,baseline)
```

baseline = baseline; % It determines how dF/F is beine calculated

```
dxl_all = zeros(length(in),1);
```

%determine the epoch length

```
for ii=1:length(in)
```

```
    s=in(ii).istim;
```

```
    xi=find(diff(s(1:end))<0)+1;
```

```
    dxi = mean(diff(xi));
```

```
    dxi_all(ii,:)=dxi;
```

```
end
```

```
epochlength = round(mean(dxi_all));
```

```
dur = epochlength*1.3;
```

```
rats=zeros(length(in),dur);
```

```
stims=rats;
```

```
mr=zeros(length(in),dur);
```

```
ms=zeros(length(in),dur);
```

```
name = cell(length(in),1);
```

```
driver = cell(length(in),1);
```

```
for ii=1:length(in)
```

```
    s=in(ii).istim;
```

```
    xi=find(diff(s(1:end-dur))<0)-1;
```

```
    iratio = in(ii).iratio;
```

```

for jj=1:length(xi) %Number of repetitions.
    temp = iratio(xi(jj):xi(jj)+dur-1); %start of repetition + duration
    if strcmp(baseline, 'ON')
        F = 'epochlength/2+(4*epochlength/10):epochlength-5';
    elseif strcmp(baseline, 'OFF')
        F = 'epochlength/2-epochlength/10:epochlength/2-epochlength/20';
    else
        F = '1:dur';
    end

    temp = temp./mean(temp(eval(F)))-1;
    mr(jj,:)=temp;

    temp=in(ii).istim(xi(jj):xi(jj)+dur-1);
    ms(jj,:)=temp;
end
rats(ii,:)=mean(mr(1:length(xi),:),1); %averaging over stimulus repetitions
stims(ii,:)=mean(ms(1:length(xi),:),1);
name{ii}=in(ii).name;
driver{ii}=in(ii).driver;
end
neuron = [in.cell];
flyID = [in.flyID];
if isfield(in,'zlayer')
    zlayer = [in.zlayer];
    out.zlayer = zlayer;
end

out.rats=rats;
out.stims=stims;
out.neuron=neuron;
out.driver = driver;
out.flyID=flyID;
out.name=name;

```

---

## Fff analysis-related script

Script name: mean\_cat\_eliflife.m

% This function computes mean and sem of a along dimension dim, grouped first by category (cats)

```
function [x,m,e]=mean_cat_eliflife(a,dim,cats)
```

```

if dim == 2
    a=a';
end

```

```

fnan=find(all(~isnan(a),2));
a=a(fnan,:);
cats=cats(fnan);

```

```
u=unique(cats);
```

```

x=zeros(length(u),size(a,2));
for ii=1:length(u)
    x(ii,:)=mean(a(find(cats==u(ii)),:),1);
end

```

```

m=mean(x,1);
e=std(x,[],1)/sqrt(length(u));

```

---

## Fff analysis-related script

Script name: fff\_stimulus\_response\_filters\_elif.m

```

%This function contains all the different filters to apply for 5sec ON OFF
%fff. The following filters can be applied or not. User choice:
%Pearson correlation between stimulus and response
%STD filter
%ON or OFF response filter
%dF/F absolut-response filter

```

```

% Author: Sebastian Molina-Obando

```

```

function

```

```

[x,m,e,final_mat,final_IDs,inds,inds_responding,inds_notresponding,cur_mat_notresp,inds_peakThreshold,ROI_max]...
= fff_stimulus_response_filters_elif...

```

```

(cur_mat,cur_stims,cur_IDs,NEURON_POLARITY,CorrelationValue,ApplyThreshold_ON,Threshhold_ON,Threshold_OFF,ApplyThreshold_OFF,...
    ApplyPeakThreshold,Threshold_Peak,NORMALIZE_ROI,Apply_STD_filter)

```

```

%% Preparing variables
Q = corr(mean(cur_stims)',cur_mat'); % Correlation vector
inds_peakThreshold = [];
ROI_max = [];

```

```

%% Applying response filters

```

```

%For ON:
%It is only applied for defined ON-responding (ON-polarity) neurons.
%The ON threshold is a user-defined scalar that is multiply by the STD
%of each response-trace at the end of the ON-Step, where no
%contrast change is present. This threshold value is compared with the
%response maximum after the ON-Step stimulation. It means that either
%noisy or not ON-responding cells (ROIs) are filter out.

```

```

if ApplyThreshold_ON == true && strcmp(NEURON_POLARITY, 'ON')

```

```

    % Positive correlation with stimulus. Only ON-responding cells will
    % have a positive correlation
    inds = find(Q>CorrelationValue);
    cur_mat_pos = cur_mat(inds,:); % ROIs responses
    cur_IDs_pos = cur_IDs(inds); % Fly IDs for ROIs

```

```

%Preparing matrices for data analysis

```

```
cur_mat_resp = cur_mat_pos;
cur_mat_notresp = cur_mat_pos;
```

```
%Creating the ON-response filter
```

```
maxPeak = max(cur_mat_resp(:,45:60),[],2);
meanTraces = mean(cur_mat_resp(:,35:50),2);
stdTraces = std(cur_mat_resp(:,35:50),[],2);
filter= meanTraces+(Threshold_ON*stdTraces);
```

```
%Creating the responding and non-responding cells vectors
```

```
if Apply_STD_filter
    std_inds = std(cur_mat_resp(:,25:45),[],2);
    inds_responding = find(maxPeak>filter & std_inds < 0.2);
    inds_notresponding = find(maxPeak<filter & std_inds > 0.2);
else
    inds_responding = find(maxPeak>filter);
    inds_notresponding = find(maxPeak<filter);
end
```

```
%Applying the filters and getting the responding and non-responding
```

```
%matrices
```

```
cur_mat_resp = cur_mat_resp(inds_responding,:);
cur_mat_notresp = cur_mat_notresp(inds_notresponding,:);
cur_mat_pos = cur_mat_resp;
cur_IDs_pos = cur_IDs_pos (inds_responding);
```

```
% dF/F absolut-response filter
```

```
if ApplyPeakThreshold == true
    cur_mat_peakThreshold = cur_mat_pos;
    maxPeak = max(cur_mat_peakThreshold(:,45:60),[],2);
    inds_peakThreshold = find(maxPeak>Threshold_Peak);
    cur_mat_peakThreshold = cur_mat_peakThreshold(inds_peakThreshold,:);
    cur_mat_pos = cur_mat_peakThreshold;
    cur_IDs_pos = cur_IDs_pos (inds_peakThreshold);
end
```

```
%For OFF:
```

```
%It is only applied for defined OFF-responding (OFF-polarity) neurons.
%The OFF threshold is a user-defined scalar that is multiply by the STD
%of each response-trace at the end of the OFF-Step, where no
%contrast change is present. This threshold value is compared with the
%response maximum after the OFF-Step stimulation. It means that either
%noisy or not OFF-responding cells (ROIs) are filter out.
```

```
elseif ApplyThreshold_OFF == true && strcmp(NEURON_POLARITY, 'OFF')
```

```
% Negative correlation with stimulus. Only OFF-responding cells will
% have a negative correlation.
```

```
inds = find(Q<-CorrelationValue);
cur_mat_neg = cur_mat(inds,:); % ROIs responses
cur_IDs_neg = cur_IDs(inds); % Fly IDs for ROIs
```

```
%Preparing matrices for data analysis
```

```
cur_mat_resp = cur_mat_neg;
cur_mat_notresp = cur_mat_neg;
```

```
%Creating the OFF-response filter
```

```

maxPeak = max(cur_mat_resp(:,95:110),[],2);
meanTraces = mean(cur_mat_resp(:,85:100),2);
stdTraces = std(cur_mat_resp(:,85:100),[],2);
filter= meanTraces+(Threshold_OFF*stdTraces);

```

*%Creating the responding and non-responding cells vectors*

```

inds_responding = find(maxPeak>filter);
inds_notresponding = find(maxPeak<filter);

```

*%Applying the filters and getting the responding and non-responding matrices*

```

cur_mat_resp = cur_mat_resp(inds_responding,:);
cur_mat_notresp = cur_mat_notresp(inds_notresponding,:);
cur_mat_neg = cur_mat_resp;
cur_IDs_neg = cur_IDs_neg (inds_responding);

```

*% dF/F absolut-response filter*

```

if ApplyPeakThreshold == true
    cur_mat_peakThreshold = cur_mat_neg;
    maxPeak = max(cur_mat_peakThreshold(:,95:110),[],2);
    inds_peakThreshold = find(maxPeak>Threshold_Peak);
    cur_mat_peakThreshold = cur_mat_peakThreshold(inds_peakThreshold,:);
    cur_mat_neg = cur_mat_peakThreshold;
    cur_IDs_neg = cur_IDs_neg (inds_peakThreshold);
end

```

*else*

*% Else, no ON or OFF response-filters are used, only correlation filter  
% is used to take the expected(known)response-polarity ROIs.*

```

if strcmp(NEURON_POLARITY, 'ON')
    inds = find(Q>CorrelationValue);
    cur_mat_pos = cur_mat(inds,:);
    cur_IDs_pos = cur_IDs(inds);
    inds_responding = inds;
    inds_notresponding = find(Q<CorrelationValue);
    inds_peakThreshold = [];
    cur_mat_notresp = cur_mat(inds_notresponding,:);

```

```

elseif strcmp(NEURON_POLARITY, 'OFF')
    inds = find(Q<-CorrelationValue);
    cur_mat_neg = cur_mat(inds,:);
    cur_IDs_neg = cur_IDs(inds);
    inds_responding = inds;
    inds_notresponding = find(Q>-CorrelationValue);
    inds_peakThreshold = [];
    cur_mat_notresp = cur_mat(inds_notresponding,:);

```

*else*

*% Else, the response-polarity is not know or if more than one polarity is  
% expected, the correlation analysis is not applied and all ROIs are considered.*

```

cur_mat_resp = cur_mat;
inds= 1:size(cur_mat,1);
inds_responding = inds;
inds_notresponding = [];
inds_peakThreshold = [];
cur_mat_notresp = [];

```

*end*

*end*

```
%% Calculating response means and errors
```

```
%Calculating means across flies. x > mean across ROIS per fly,  
%m > mean across fly means, e > sem across fly means
```

```
if strcmp(NEURON_POLARITY, 'OFF')
```

```
    if NORMALIZE_ROI
```

```
        ROI_max = max(cur_mat_neg,[],2)*ones(1,length(cur_mat_neg(1,:)));
```

```
        cur_mat_neg_norm = cur_mat_neg./ROI_max; % normalized by dividing by the max  
responses for each ROI
```

```
        cur_mat_neg = cur_mat_neg_norm;
```

```
    end
```

```
    [x,m,e] = mean_cat_full(cur_mat_neg,1,cur_IDs_neg);
```

```
    final_mat = cur_mat_neg;
```

```
    final_IDs = cur_IDs_neg;
```

```
elseif strcmp(NEURON_POLARITY, 'ON')
```

```
    if NORMALIZE_ROI
```

```
        ROI_max = max(cur_mat_pos,[],2)*ones(1,length(cur_mat_pos(1,:)));
```

```
        cur_mat_pos_norm = cur_mat_pos./ROI_max; % normalized by dividing by the max  
responses for each ROI
```

```
        cur_mat_pos = cur_mat_pos_norm;
```

```
    end
```

```
    [x,m,e] = mean_cat_full(cur_mat_pos,1,cur_IDs_pos);
```

```
    final_mat = cur_mat_pos;
```

```
    final_IDs = cur_IDs_pos;
```

```
else
```

```
    if NORMALIZE_ROI
```

```
        ROI_max = max(cur_mat,[],2)*ones(1,length(cur_mat(1,:)));
```

```
        cur_mat_norm = cur_mat./ROI_max; % normalized by dividing by the max responses for  
each ROI
```

```
        cur_mat = cur_mat_norm;
```

```
    end
```

```
    [x,m,e] = mean_cat_full(cur_mat,1,cur_IDs);
```

```
    final_mat = cur_mat;
```

```
    final_IDs = cur_IDs;
```

```
end
```

---

## Fff analysis-related script

Script name: niceaxes.m

```
%It makes current axes nicer
```

```
set(gca,'fontname','times','fontsize',14);
```

```
ax=findall(gca,'Type','line');
```

```
for i=1:length(ax)
```

```
    set(ax(i),'linewidth',2);
```

```

end
ax=findall(gcf,'Type','text');
for i=1:length(ax)
    set(ax(i),'fontname','times','fontsize',14);
end

```

---

## Fff analysis-related script

Script name: plot\_err\_patch\_v2.m

% This function plots the sem shade around the mean.

```

function g=plot_err_patch_v2(x,y,e,col1,col2,style)

x=x(:)'; %Inverts to column vector
y=y(:)';
e=e(:)';

ye1=y+e;
ye2=y-e; ye2=ye2(end:-1:1);
ye=[ye1, ye2];
xe=[x, x(end:-1:1)];

hold on;
h=patch(xe, ye, col2, 'linestyle', 'none');
set(h, 'FaceAlpha', 0.7);
if(nargin==6)
    g=plot(x, y, 'color', col1, 'linewidth', 2, 'linestyle', style);
else
    g=plot(x, y, 'color', col1, 'linewidth', 2);
end

```

---



---

## Full field flash plot and statistical analysis

Script name: Trace\_per\_Category\_and\_Genotype\_elife.m

Sub-functions needed:

database\_select\_samples\_elife.m

load\_experiment\_conditions.m

niceaxes.m

plot\_err\_patch\_v2.m

% Plotting and Statistical analysis script for ON / OFF full field flashes (fff).  
% It loads and analyze all files for given experimental conditions in a txt  
% file (automatized mode) or for an specific experiment (non-automatized  
% mode)

% Author: Sebastian Molina-Obando

clc;  
clear all;  
close all;

### %% GENERAL CONSTANTS

% The user needs to define this.

Automatized = true; % "True" if a txt file for the automatized mode is used. Otherwise, write "false".

savingData = true; % "True" for saving data (variables and plots) in a folder in your computer. Otherwise, write "false".

save\_in\_folder = 'C:\MATLAB\_FOLDER\2p\2p\_pData\5secffleLife\ExperimentalData\'; % Write the path of the folder

load\_data\_from = 'C:\MATLAB\_FOLDER\2p\2p\_pData\5secffleLife\GenotypesData\'; % Write the path of the folder

BaselineShift = true; % "True" for plotting baseline at 0. Otherwise, write "false".

NeuronType = 'ON'; % Choose between 'ON', 'OFF' based on the neuron response polarity.

OutlierFilter = false; % "True" for filtering out the outliers in the Fly matrix. Otherwise, write "false".

### %% CONSTANTS for non-Automatized mode

% The user need to define this.

NEURONCLASS = 'Tm3'; % for adjusting plot y limits and adding text on the figure

NORMALIZE\_ROI = false; % "True" to plot existing ROI-normalized data. Otherwise, write "false".

NORMALIZE\_FLY = true; % "True" to plot existing Fly-normalized data. Otherwise, write "false".

COLORS = 'greenOrange'; % 'blueOrange', 'greenRed', 'blueRed'...

NUMBER\_OF\_VARIABLES = 1; % Define the existing number of variables to plot (Step, Plateau, Integral...)

NUMBER\_OF\_GROUPS = 2; % Define the desired number of groups (genotypes) to be plotted together

LAYER = 'M1'; % Select the layer: 'M1', 'M5', 'M9', 'Ax', 'De' ...

EXPERIMENT = 'Tm3 MPEP'; % Define the name of the experiment. There will be a specific folder created with the data

CONDITION = '100uM PTX'; % Define the name of the experimental condition. There will be a specific folder created with the data

pairedData = false; % "True" if your groups (genotypes) are paired. Otherwise, write "false".

Statistics = 'T-TEST'; % Choose the statistical test to perform: 'ANOVA1', 'ANOVA2', 'ANOVAn', 'T-TEST'



```
Correction = 'None'; % Choose the type of post-hoc correction: 'Bonferroni', 'Tukey', ...
```

```
%% Organizing variables
```

```
numberOfgroups = NUMBER_OF_GROUPS;  
numberOfvariables = NUMBER_OF_VARIABLES;  
gen_str = cell(numberOfgroups);  
variable_str = cell(numberOfvariables);  
DataNames = {};
```

```
% Asking for user input in non-automatized mode
```

```
if Automatized == false
```

```
    for i = 1:numberOfgroups  
        prompt = 'Name(genotype): ';  
        GENOTYPE_STRING = input(prompt, 's');  
        gen_str{i} = GENOTYPE_STRING;
```

```
    end
```

```
    for i = 1:numberOfvariables  
        prompt = 'Name(variable to measure): ';  
        VARIABLE_STRING = input(prompt, 's');  
        variable_str{i} = VARIABLE_STRING;
```

```
    end
```

```
end
```

```
%% Selecting samples from Database
```

```
% add the path of needed functions
```

```
% addpath(genpath('C:\Users\s.molinaobando\MATLAB\TP_code_Seb'))
```

```
% addpath(genpath('C:\MATLAB_FOLDER\TP_code_Seb'));
```

```
database_select_samples_elif; % Here all the different experimental conditions are added (E.g.  
genotype, stimulus presented, experiment number, quality of recording, DRUG...)
```

```
%% Automatized Analysis: data selection
```

```
stopForLoop = false;
```

```
for aut_i = 1:length(EXPERIMENT)
```

```
    if stopForLoop
```

```
        break
```

```
    end
```

```
    if Automatized
```

```
        close all
```

```
[EXPERIMENT, CONDITION, NEURONCLASS, NORMALIZE_ROI, NORMALIZE_FLY, LAYER, C  
OLORS, pairedData, ...
```

```
NUMBER_OF_VARIABLES, NUMBER_OF_GROUPS, variable_str, gen_str, DataNames, Statistic  
s, Correction]...
```

```
=load_experiment_conditions(Automatized, EXPERIMENT, CONDITION, NEURONCLASS, NOR  
MALIZE_ROI, ...
```

```
NORMALIZE_FLY, LAYER, COLORS, pairedData, NUMBER_OF_VARIABLES, NUMBER_OF_G  
ROUPS, variable_str, gen_str, DataNames, Statistics, Correction);
```

```
    EXPERIMENT = char(EXPERIMENT(aut_i));
```

```
    CONDITION = char(CONDITION(aut_i));
```

```

NEURONCLASS = char(NEURONCLASS(aut_i));
NORMALIZE_FLY = NORMALIZE_FLY(aut_i);
NORMALIZE_ROI = NORMALIZE_ROI(aut_i);
COLORS = char(COLORS(aut_i));
LAYER = char(LAYER(aut_i));
variable_str = char(variable_str(aut_i));
gen_str = char(gen_str(aut_i));
numberOfvariables = NUMBER_OF_VARIABLES(aut_i);
numberOfgroups = NUMBER_OF_GROUPS(aut_i);
AllDataNames = DataNames;
Original_variable_str = variable_str;
Original_gen_str = gen_str;
Statistics = char(Statistics(aut_i));
Correction = char(Correction(aut_i));

else
    stopForLoop = true;

end

%% COLORS
% Color combinations (mean, sem) for 2 or 3 groups
switch COLORS

    case 'greenRed'
        colorss = {[44/256 162/256 95/256] ; [153/256 216/256 201/256];[222/256 45/256
38/256];...
[252/256 146/256 114/256]}; %greenRed
    case 'greenOrange'
        colorss = {[44/256 162/256 95/256] ; [153/256 216/256 201/256];[217/256 95/256
14/256];...
[254/256 196/256 79/256]}; %greenOrange
    case 'blueRed'
        colorss = {[49/256 130/256 189/256] ; [158/256 202/256 225/256];[222/256 45/256
38/256];...
[252/256 146/256 114/256]}; %blueRed
    case 'blueOrange'
        colorss = {[49/256 130/256 189/256] ; [158/256 202/256 225/256];[217/256 95/256
14/256];...
[254/256 196/256 79/256]}; %blueOrange
    case 'greyLightgreyRed'
        colorss = {[99/256 99/256 99/256] ; [189/256 189/256 189/256];[189/256 189/256
189/256]...
[240/256 240/256 240/256];[222/256 45/256 38/256];[252/256 146/256
114/256]}; %greyLightgreyRed
    case 'greyOrangeRed'
        colorss = {[99/256 99/256 99/256] ; [189/256 189/256 189/256];[217/256 95/256
14/256]...
[254/256 196/256 79/256];[222/256 45/256 38/256];[252/256 146/256
114/256]}; %greyOrangeRed

end

```

%% Loading Data and organizing variables in matrices

```
for var = 1:numberOfvariables

    %Initializing variables
    allDataCell= cell(numberOfgroups,1);
    m_all_mat=[];
    e_all_mat=[];
    numOfflies_mat=[];
    numOfROIs_mat=[];
    clear GenotypeSampleInfo;

    for i = 1:numberOfgroups

        if var == 1
            if Automatized
                DataNames = AllDataNames;
                DataNames = char(DataNames(aut_i));
                DataNames = strsplit(DataNames, ',');

            else

                prompt = 'select the Data (name of the folder containing the data): ';
                Data = input(prompt,'s');
                DataNames{i} = Data;
            end
        end

        % Loading previously-analysed data
        if NORMALIZE_ROI
            Data = char(DataNames(i));
            load([load_data_from,'NORMALIZED_by_ROI\',Data,'\',LAYER], 'final_mat',
'final_IDs','FlyOffStep','FlyOnStep','FlyOffPlateau','FlyOnPlateau','FlyOffPeak','FlyOnPeak','Stim
ulus_trace');
        else
            Data = char(DataNames(i));
            load([load_data_from,Data,'\',LAYER], 'x_final','m_final','e_final',...
'final_mat',
'final_IDs','FlyOffIntegral','FlyOnIntegral','FlyOffIntegral_norm','FlyOnIntegral_norm','FlyOffStep','
FlyOnStep','FlyOffStep_norm','FlyOnStep_norm','FlyOffPlateau',...

'FlyOnPlateau','FlyOffPlateau_norm','FlyOnPlateau_norm','FlyOffPeak','FlyOnPeak','FlyOffPeak
_norm',...

'FlyOnPeak_norm','FlyOffPeakAbovePlateau','FlyOnPeakAbovePlateau','FlyOffPeakAbovePlate
au_norm','FlyOnPeakAbovePlateau_norm','Stimulus_trace');
        end

        m_all_mat(i,:) = m_final;
        e_all_mat(i,:) = e_final;
        numOfflies_mat(i) = size(x_final,1);
        numOfROIs_mat(i) = size(final_mat,1);
        iRATE = 10;
        cur_t = [1:size(final_mat,2)]/iRATE;

        % Creating data matrices for future plots and analysis
        if Automatized
```

```

        variable_str = Original_variable_str;
        variable_str = strsplit(variable_str, ',');
    end

    if NORMALIZE_FLY
        FlyOnVariable = eval(['FlyOn', char(variable_str(var)), '_norm']);
        FlyOffVariable = eval(['FlyOff', char(variable_str(var)), '_norm']);
    else
        FlyOnVariable = eval(['FlyOn', char(variable_str(var))]);
        FlyOffVariable = eval(['FlyOff', char(variable_str(var))]);
    end

    % Filtering Data Outliers by Fly
    if OutlierFilter
        outlier_filter_On = ~isoutlier(FlyOnVariable);
        FlyOnVariable = FlyOnVariable(outlier_filter_On);
        outlier_filter_Off = ~isoutlier(FlyOffVariable);
        FlyOffVariable = FlyOffVariable(outlier_filter_Off);
    end

    % Naming variables accoring to LAYERs being analyzed
    if(strcmp(LAYER, 'Ax'))
        x.FlyOffVariable_Ax = FlyOffVariable;
        x.FlyOnVariable_Ax = FlyOnVariable;

    elseif(strcmp(LAYER, 'M1'))
        x.FlyOffVariable_M1 = FlyOffVariable;
        x.FlyOnVariable_M1 = FlyOnVariable;

    elseif(strcmp(LAYER, 'M5'))
        x.FlyOffVariable_M5 = FlyOffVariable;
        x.FlyOnVariable_M5 = FlyOnVariable;

    elseif(strcmp(LAYER, 'M9'))
        x.FlyOffVariable_M9 = FlyOffVariable;
        x.FlyOnVariable_M9 = FlyOnVariable;

    else
        Disp('Not such a CATEGORY implemented yet');
    end

    allDataCell{i} = x;
end

%% Plotting mean across flies
f1=figure(1);
hold on
a= 0; % Initializing variable

for i = 1:numberOfgroups
    cm=colormap('lines');
    if BaselineShift
        switch NeuronType
            case 'ON'
                m_all_mat(i,:) = m_all_mat(i,:) - mean(m_all_mat(i,40:50));
            case 'OFF'
                m_all_mat(i,:) = m_all_mat(i,:) - mean(m_all_mat(i,90:100));
        end
    end
end

```

```

        end
    end
    try
        h =
plot_err_patch_v2(cur_t,m_all_mat(i,:),e_all_mat(i,:),colorss{i+a},colorss{i+1+a});
    catch
        % In the case of plotting together more groups than
        % colors available in the variable "colorss"
        h = plot_err_patch_v2(cur_t,m_all_mat(i,:),e_all_mat(i,:),colorss{1},colorss{3});
    end

    if Automated
        gen_str = Original_gen_str;
        gen_str = strsplit(gen_str,',');
    end

    h.DisplayName = sprintf([gen_str{i} ', N = %d ( %d
)],numOfflies_mat(i),numOfROIs_mat(i));
    GenotypeSampleInfo{i} = sprintf([gen_str{i} ', N = %d ( %d
)],numOfflies_mat(i),numOfROIs_mat(i));
    handle(i).handle = h;

    %Adjusting the plot and adding information
    switch NEURONCLASS
    case 'Tm3'
        ylim ([-0.8 5])
        plot(cur_t, (round(mean(Stimulus_trace))*0.1)+1.8);
        if i == numberOfgroups
            text(8,1.5,GenotypeSampleInfo');
        end

    case 'Mi1'
        ylim ([-0.8 4])
        plot(cur_t, (round(mean(Stimulus_trace))*0.1)+1.8);
        if i == numberOfgroups
            text(8,1.5,GenotypeSampleInfo');
        end

    case 'T4_T5'
        ylim ([-0.5 3]);
        plot(cur_t, (round(mean(Stimulus_trace))*0.2)+2.5);
        if i == numberOfgroups
            text(8,0.5,GenotypeSampleInfo');
        end

    case 'T4_T5_small'
        ylim ([-0.5 0.8]);
        plot(cur_t, (round(mean(Stimulus_trace))*0.1)+0.6);
        if i == numberOfgroups
            text(8,0.5,GenotypeSampleInfo');
        end

    case 'iGluSnFR'
        ylim ([-0.4 0.4]);
        plot(cur_t, (round(mean(Stimulus_trace))*0.1)+0.3);
        if i == numberOfgroups
            text(6,0.3,GenotypeSampleInfo');
        end

    case 'L1'
        ylim ([-0.8 0.8]);

```

```

        plot(cur_t, (round(mean(Stimulus_trace))*0.1)+0.5);
        if i == numberOfgroups
            text(6,0.3,GenotypeSampleInfo);
        end
    end

    set(gcf,'Color','w');
    niceaxes;
    a = a +1;
end

title([EXPERIMENT, ' Mean by fly, LAYER:',LAYER]);
ylabel('dF/F');
xlabel ('s');

if numberOfgroups == 1
    figure(2);
    plot(cur_t,x_all)
    title('individual fly means');
end

%% Plotting mean across flies (for normalized-by-fly vairable)

if NORMALIZE_FLY && numberOfgroups < 8
    f3=figure(3);
    hold on
    a= 0;
    for i = 1:numberOfgroups

        Data = DataNames{i};
        %Loading normalized data
        load([load_data_from,Data,'\',LAYER], 'final_mat',
'final_IDs','Stimulus_trace','x_final_norm','e_final_norm');

        if BaselineShift
            m_x_final_norm = mean(x_final_norm);
            x_final_norm = x_final_norm - mean(m_x_final_norm(40:50));
        end
        try
            h3 =
plot_err_patch_v2(cur_t,mean(x_final_norm),e_final_norm,colorss{i+a},colorss{i+1+a});
        catch
            % In the case of plotting together more groups than
            % colors available in the variable "colorss"
            h3 =
plot_err_patch_v2(cur_t,mean(x_final_norm),e_final_norm,colorss{1},colorss{3});
        end

        axis('tight');
        a= a+1;
    end

    % Adjusting the plot and adding information
    ylim ([-0.8 1.5])
    plot(cur_t, (round(mean(Stimulus_trace))*0.1)+1);

    text(8,0.7,GenotypeSampleInfo);

```

```

string1 =([EXPERIMENT, ' LAYER: ',LAYER]);
title({string1;'Mean by Fly, Normalized by Fly to Control'});
end

```

%% Bar plot: Data Analysis and arrangement

```

gen_str = gen_str';
if Automatized
    gen_str = gen_str';
end

```

```

Variables_str = {'ON'; 'OFF'};
for i = 1:numberOfgroups
    gen_str2(i) = {gen_str{1,i}};
end

```

% Assigning Variables

```

meanOnVariableMatrix = cell(numberOfgroups,1);
stdOnVariableMatrix = cell(numberOfgroups,1);
semOnVariableMatrix = cell(numberOfgroups,1);

```

```

meanOffVariableMatrix = cell(numberOfgroups,1);
stdOffVariableMatrix = cell(numberOfgroups,1);
semOffVariableMatrix = cell(numberOfgroups,1);

```

```

for j = 1:numberOfgroups
    OnVariableMatrix{j} = eval(['allDataCell{j}.FlyOnVariable_',LAYER]);
    meanOnVariableMatrix{j} =
mean(eval(['allDataCell{j}.FlyOnVariable_',LAYER]));
    stdOnVariableMatrix{j} = std(eval(['allDataCell{j}.FlyOnVariable_',LAYER]));
    semOnVariableMatrix{j} =
std(eval(['allDataCell{j}.FlyOnVariable_',LAYER])/sqrt(length(eval(['allDataCell{j}.FlyOnVariable
_',LAYER]))));

    OffVariableMatrix{j} = eval(['allDataCell{j}.FlyOffVariable_',LAYER]);
    meanOffVariableMatrix{j} =
mean(eval(['allDataCell{j}.FlyOffVariable_',LAYER]));
    stdOffVariableMatrix{j} = std(eval(['allDataCell{j}.FlyOffVariable_',LAYER]));
    semOffVariableMatrix{j} =
std(eval(['allDataCell{j}.FlyOffVariable_',LAYER])/sqrt(length(eval(['allDataCell{j}.FlyOffVariable
_',LAYER]))));
end

```

```

On_y = meanOnVariableMatrix;
Off_y= meanOffVariableMatrix;
On_y = cell2mat(On_y)';
Off_y = cell2mat(Off_y)';

```

```

On_sem = semOnVariableMatrix;
Off_sem= semOffVariableMatrix;
On_sem = cell2mat(On_sem)';
Off_sem = cell2mat(Off_sem)';

```

%% Statistical Analysis

```

if numberOfgroups == 2

```

%ON Variable

```

disp('>>>>>>>>> Statistical Analysis for ON Variable: ');

X = OnVariableMatrix{1};
Y = OnVariableMatrix{2};

%Normality test
try
    [h,p,kstat,critval] = lillietest(X,'Alpha',0.01); display(['Is X normal distributed?'
    ,fprintf('For X, h= %d, p=%f',h,p)]); %Normality test
    [h,p,kstat,critval] = lillietest(Y,'Alpha',0.01); display(['Is Y normal
distributed?',fprintf('For Y, h= %d, p=%f',h,p)]);% Normality test
catch
    disp('Error in Normality test');
end

% Performing T-TEST
if pairedData
    try
        [h,p1] = ttest(X,Y); display(fprintf('For X vs Y, h= %d, p=%f',h,p1)); %Ttest
        OnVariablePvalue = sprintf('Pvalue ON: %f ', p1);
    catch
        [h,p1] = ttest2(X,Y); display(fprintf('For X vs Y, h= %d, p=%f',h,p1)); %Ttest
        OnVariablePvalue = sprintf('Pvalue ON: %f ', p1);
        display('DIFFERENT SAMPLE SIZE AMONG GROUPS');
    end
else
    [h,p1] = ttest2(X,Y); display(fprintf('For X vs Y, h= %d, p=%f',h,p1)); %Ttest
    OnVariablePvalue = sprintf('Pvalue ON: %f ', p1);
end

%OFF Variable
disp('>>>>>>>>> Statistical Analysis for OFF Variable: ');

X = OffVariableMatrix{1};
Y = OffVariableMatrix{2};

%Normality test
try
    [h,p,kstat,critval] = lillietest(X,'Alpha',0.01); display(['Is X normal distributed?'
    ,fprintf('For X, h= %d, p=%f',h,p)]); %Normality test
    [h,p,kstat,critval] = lillietest(Y,'Alpha',0.01); display(['Is Y normal
distributed?',fprintf('For Y, h= %d, p=%f',h,p)]);% Normality test
catch
    disp('Error in Normality test');
end

% Performing T-TEST
if pairedData
    try
        [h,p1] = ttest(X,Y); display(fprintf('For X vs Y, h= %d, p=%f',h,p1)); %Ttest
        OffVariablePvalue = sprintf('Pvalue OFF: %f ', p1);
    catch
        [h,p1] = ttest2(X,Y); display(fprintf('For X vs Y, h= %d, p=%f',h,p1)); %Ttest
        OffVariablePvalue = sprintf('Pvalue OFF: %f ', p1);
        display('DIFFERENT SAMPLE SIZE AMONG GROUPS, data is not paired');
    end
else
    [h,p1] = ttest2(X,Y); display(fprintf('For X vs Y, h= %d, p=%f',h,p1)); %Ttest
    OffVariablePvalue = sprintf('Pvalue OFF: %f ', p1);
end

```



```

end

elseif numberOfgroups > 2
%ON Variable
disp('>>>>>>>>> Statistical Analysis for ON Variable: ');
h_all_OnVariable = {};
On_p_values=[];
h_all_OnVariable{1} = 'Pvalues ON Variable';
X = OnVariableMatrix{1};
X_name = gen_str{1};

%Normality test for first group
try
[h,p,kstat,critval] = lillietest(X,'Alpha',0.01);
catch
h = ' Not computed';
disp(['>>>> Error in Normality test
',EXPERIMENT,'_',LAYER,'_',char(variable_str(var))]);
end

if h == 1 %if h=1, the null hypothesis ("the data is normally distributed") IS rejected
ANSWER1 = ' NO';
display(['Normal distributed?' ,fprintf('For %s, h= %d, p=%f',X_name,h,p),
ANSWER1)); %Normality test
elseif strcmp(h,' Not computed')
ANSWER1 = h;
display(['Normal distributed?',ANSWER1,]); %Normality test
elseif h == 0
ANSWER1 = ' YES';
display(['Normal distributed?' ,fprintf('For %s, h= %d, p=%f',X_name,h,p),
ANSWER1)); %Normality test
end

% Normality test for the other groups and T-TEST
for s = 2:numberOfgroups
Y = OnVariableMatrix{s};
Y_name = gen_str{s};
try
[h,p,kstat,critval] = lillietest(Y,'Alpha',0.01);
catch
h = ' Not computed';
disp(['>>>> Error in Normality test
',EXPERIMENT,'_',LAYER,'_',char(variable_str(var))]);
end

if h == 1 %if h=1, the null hypothesis ("the data is normally distributed") IS
rejected
ANSWER1 = ' NO';
display(['Normal distributed?' ,fprintf('For %s, h= %d, p=%f',Y_name,h,p),
ANSWER1)); %Normality test
elseif strcmp(h,' Not computed')
ANSWER1 = h;
display(['Normal distributed?',ANSWER1,]); %Normality test
elseif h == 0
ANSWER1 = ' YES';
display(['Normal distributed?' ,fprintf('For %s, h= %d, p=%f',Y_name,h,p),
ANSWER1)); %Normality test
end

```

```

[h,p1] = ttest2(X,Y); display(sprintf('T-TEST. For %s vs %s, h= %d,
p=%f',X_name,Y_name,h,p1)); %Ttest
OnVariablePvalue = sprintf('Pvalue ON: %f ', p1);
h_all_OnVariable{s} =p1;
On_p_values(s-1)= p1;
end

% For Anova. Variable's matrix organization and tests

%Initializing variables
Y_all= [];
groups = {};
%Organizing matrices
for s = 1:numberOfgroups
    if strcmp(Statistics, 'ANOVA1')
        Y_all = vertcat(Y_all ,OnVariableMatrix{s}); %Organizing y vector for Anova
        for g =1:length(OnVariableMatrix{s})
            groups = [groups gen_str(s)];
        end
    elseif strcmp(Statistics, 'ANOVA1')
        Y_all = vertcat(Y_all ,OnVariableMatrix{s}); %Organizing y vector for
Anovan

        for g =1:length(OnVariableMatrix{s})
            groups = [groups gen_str(s)];
        end

    elseif strcmp(Statistics, 'ANOVA2')
        Y_all(s) = mean(OnVariableMatrix{s});
    end
end

% Performing tests
if strcmp(Statistics, 'ANOVA1') %One-way Anova
    [p,tb1,stats] = anova1(Y_all,groups);
    f2= figure(2); title([EXPERIMENT,variable_str(var),' ON Response ']);
    f4= figure(4); title([EXPERIMENT,variable_str(var),' ON Response ']);
    [c] = multcompare(stats,'ctype','bonferroni');

    % Bonferroni correction for multiple comparisons
    if strcmp(Correction, 'Bonferroni')
        [BonfCor_p_values,cor_h]=bonf_holm(On_p_values,0.05);
        for b = 1:length(cor_h)
            display(sprintf('Bonferroni correction %s: h= %d,
p=%f\n',gen_str{b+1},cor_h(b),BonfCor_p_values(b))); % b+1 because condition in position 1 is
being compared with all the others
        end

        h_all_OnVariable{1} = 'BonfCor Pvalues ON Variable';
        for s = 2:numberOfgroups
            h_all_OnVariable{s} = BonfCor_p_values(s-1);
        end

    end

elseif strcmp(Statistics, 'ANOVA1') %Unblanced two-way Anova
    g1={};
    g2={};
    for i = 1:length(groups)
        tempName =groups{i};

```

```

        g1{i} = tempName(1:5);
        g2{i} = tempName(end);
    end
    [p,tb1,stats] = anovan(Y_all,{g1 g2},'model',2,...
        'varnames',{'PTX','allele'});
    f2= figure(2); title([EXPERIMENT,variable_str(var),' ON Response ']);
    f4 = figure(4);
    hold on
    [c,m,h,nms] = multcompare(stats,'Dimension',[1 2]);
    title([EXPERIMENT,variable_str(var),' ON Response ']);
end

%OFF Variable
disp('>>>>>>>>>> Statistical Analysis for OFF Variable: ');
h_all_OffVariable = {};
Off_p_values=[];
h_all_OffVariable{1} = 'Pvalues OffVariable';
for s = 2:numberOfgroups
    X = OffVariableMatrix{1};
    Y = OffVariableMatrix{s};
    [h,p1] = ttest2(X,Y); display(sprintf('For X vs Y, h= %d, p=%f',h,p1)); %Ttest
    OnVariablePvalue = sprintf('Pvalue ON: %f ', p1);
    h_all_OffVariable{s} =p1;
    Off_p_values(s-1)= p1;
end

end

%% Bar Plot
y = [On_y;Off_y];
sem = [On_sem;Off_sem];
labels= gen_str2;

if numberOfgroups == 2
    DataSummary = sprintf(['Data Summary: \nGenotype %s:\n ON: %.3f +/- %.3f, \n
OFF %.3f +/- %.3f \n'...
        'Genotype %s:\n ON: %.3f +/- %.3f, \n OFF %.3f +/- %.3f'], labels{1},On_y(1),
On_sem(1), Off_y(1), Off_sem(1),labels{2},On_y(2), On_sem(2), Off_y(2), Off_sem(2));
elseif numberOfgroups == 3
    DataSummary = sprintf(['Data Summary: \nGenotype %s:\n ON: %.3f +/- %.3f, \n
OFF %.3f +/- %.3f \n'...
        'Genotype %s:\n ON: %.3f +/- %.3f, \n OFF %.3f +/- %.3f\n'...
        'Genotype %s:\n ON: %.3f +/- %.3f, \n OFF %.3f +/- %.3f']...
        , labels{1},On_y(1), On_sem(1), Off_y(1), Off_sem(1),labels{2},On_y(2), On_sem(2),
Off_y(2), Off_sem(2),labels{3},On_y(3), On_sem(3), Off_y(3), Off_sem(3));
else
    DataSummary = sprintf(['Implement the Code for Data Summary']);
end

% Adjusting x position variable for bar plot
if numberOfgroups == 2
    x= [0.86,1.14];
elseif numberOfgroups == 3
    x= [0.785,1,1.225];
elseif numberOfgroups == 4
    x= [0.73,0.915,1.09,1.275];
elseif numberOfgroups == 7
    x= [0.655,0.77,0.885,1.0,1.115,1.23,1.34];
elseif numberOfgroups == 8

```

```

        x= [0.65,0.75,0.85,0.95,1.05,1.15,1.25,1.35];
    end

    if numberOfgroups == 2
        %For two groups is useful to have p-values visible in
        %the title
        f5= figure(5); title([EXPERIMENT,variable_str(var),' Response ',
OnVariablePValue,OffVariablePValue]);
    else
        f5= figure(5); title([EXPERIMENT,variable_str(var),' Response ']);
    end
    hold on;
    hB = bar(y,'FaceColor','flat');

    hB(1).FaceColor = colorss{1};
    hB(2).FaceColor = colorss{3};

    hAx=gca; % getting a variable for the current axes handle
    xticks([1 2]);
    hAx.XTickLabel=Variables_str; % label the ticks

    pause(3) % Pausing here allows matlab to plot text correctly

    hT=[]; % placeholder for text object handles
    for i=1:length(hB)% iterate over number of bar objects
        if numberOfgroups > 3
            hT=[hT,text(hB(i).XData+hB(i).XOffset-
0.05,hB(i).YData,labels(i),'VerticalAlignment','bottom','horizontalalign','center','FontSize',10)];
        else
            hT=[hT,text(hB(i).XData+hB(i).XOffset-
0.05,hB(i).YData,labels(i),'VerticalAlignment','bottom','horizontalalign','center','FontSize',14)];
        end
    end

    ex = x;
    for i=1:size(y,1) % iterate over Variables
        e = errorbar(ex,y(i,:),sem(i,:), 'k. ');
        e.LineWidth = 0.75;
        ex = ex +1;
    end

    sz = 10; % Scatter-feature's size
    % Scatter Plot ON
    for j = 1:size(OnVariableMatrix,2)
        xData= x(j);
        for i = 1:size(OnVariableMatrix{j},1)-1
            xData = [xData; x(j)];
        end
        s1 = scatter(xData,OnVariableMatrix{j},sz,'o');
        s1.MarkerEdgeColor = 'k';
        % s1.MarkerFaceColor = 'k';
        hold on
    end
    % Scatter Plot OFF
    for j = 1:size(OffVariableMatrix,2)
        xData= x(j)+1;
        for i = 1:size(OffVariableMatrix{j},1)-1
            xData = [xData; x(j)+1];

```

```

end
s1 = scatter(xData,OffVariableMatrix{j},sz,'o');
s1.MarkerEdgeColor = 'k';
% s1.MarkerFaceColor = 'k';
hold on
end

% Adding some information to the plot
if numberOfgroups > 2
    upperlimit = hAx.YLim(2);
    text(1.5,upperlimit/2, h_all_OnVariable,'FontSize',5);
    text(2,upperlimit/2, h_all_OffVariable,'FontSize',5);
    plot_ylim=get(gca,'ylim');
    text(2,plot_ylim(1)-(plot_ylim(1)/3), DataSummary,'FontSize',5);
else
    plot_ylim=get(gca,'ylim');
    switch NeuronType
        case 'OFF'
            text(1,plot_ylim(2)-(plot_ylim(2)/3), DataSummary,'FontSize',5);
        case 'ON'
            text(2,plot_ylim(2)-(plot_ylim(2)/3), DataSummary,'FontSize',5);
    end
end

end

%% Saving Data
if savingData
    if NORMALIZE_ROI

        cd('C:\MATLAB_FOLDER\2p\2p_pData\5secff\NORMALIZE_ROI')
        listing =dir(EXPERIMENT);
        if isempty(listing)
            mkdir(EXPERIMENT);
        end

        cd(['C:\MATLAB_FOLDER\2p\2p_pData\5secff\NORMALIZE_ROI\EXPERIMENT'])
        listing =dir(CONDITION);
        if isempty(listing)
            mkdir(CONDITION);
        end

        cd(['C:\MATLAB_FOLDER\2p\2p_pData\5secff\NORMALIZE_ROI\EXPERIMENT\CONDITION'])
        saveas(f1,[EXPERIMENT,'_',CONDITION,'_',LAYER,'_5sfff_trace.pdf'])

        saveas(f1,[EXPERIMENT,'_',CONDITION,'_',LAYER,'_5sfff_NORMALIZED_trace.pdf'])

        saveas(f5,[EXPERIMENT,'_',CONDITION,'_',LAYER,'_5sfff_NORMALIZED_',char(variable_str(
var)),'.pdf'])
    else

        cd(save_in_folder)
        listing =dir(EXPERIMENT);
        if isempty(listing)
            mkdir(EXPERIMENT);
        end

        cd([save_in_folder,EXPERIMENT])
    end
end

```

```

        listing =dir(CONDITION);
        if isempty(listing)
            mkdir(CONDITION);
        end
        cd([save_in_folder,EXPERIMENT,'\',CONDITION])
        saveas(f1,[EXPERIMENT,'_',CONDITION,'_',LAYER,'_5sfff_trace.pdf']);
        if NORMALIZE_FLY

saveas(f5,[EXPERIMENT,'_',CONDITION,'_',LAYER,'_5sfff_NormalizedByFly_',char(variable_s
tr(var)),'.pdf']);
            if strcmp(Statistics, 'ANOVA1')

saveas(f2,[EXPERIMENT,'_',CONDITION,'_',LAYER,'_5sfff_NormalizedByFly_one_way_ANO
VA_table_ON_',char(variable_str(var)),'.pdf']);

saveas(f4,[EXPERIMENT,'_',CONDITION,'_',LAYER,'_5sfff_NormalizedByFly_one_way_ANO
VA_ON_',char(variable_str(var)),'.fig']);
                save([EXPERIMENT,'_',CONDITION,'_',LAYER,'_Multiple comparisons
statistics','_ON_',char(variable_str(var)),'.txt'],'-ASCII','c');
                elseif strcmp(Statistics, 'ANOVA2')

saveas(f2,[EXPERIMENT,'_',CONDITION,'_',LAYER,'_5sfff_NormalizedByFly_two_way_ANOV
A_table_ON_',char(variable_str(var)),'.pdf']);

saveas(f4,[EXPERIMENT,'_',CONDITION,'_',LAYER,'_5sfff_NormalizedByFly_two_way_ANOV
A_ON_',char(variable_str(var)),'.fig']);
                elseif strcmp(Statistics, 'ANOVA3')

saveas(f2,[EXPERIMENT,'_',CONDITION,'_',LAYER,'_5sfff_NormalizedByFly_two_way_unbal
anced_ANOVA_table_ON_',char(variable_str(var)),'.pdf']);

saveas(f4,[EXPERIMENT,'_',CONDITION,'_',LAYER,'_5sfff_NormalizedByFly_two_way_unbal
anced_ANOVA_ON_',char(variable_str(var)),'.fig']);
                save([EXPERIMENT,'_',CONDITION,'_',LAYER,'_Multiple comparisons
statistics','_ON_',char(variable_str(var)),'.txt'],'-ASCII','c');

            end

        try

saveas(f3,[EXPERIMENT,'_',CONDITION,'_',LAYER,'_5sfff_trace_NormalizedByFly.pdf']);
            catch
                disp('Normalized trace was not generated');
            end
        else

saveas(f5,[EXPERIMENT,'_',CONDITION,'_',LAYER,'_5sfff_',char(variable_str(var)),'.pdf']);
        end

    end

end

% Initializing structures
close(f2);
close all;
clear x;
clear allDataCell;
end

```

end

---

---

## Fff plot and statistical analysis-related script

Script name: load\_experiment\_conditions.m

% It load the different experiment conditions provided in a txt file  
% (Experiments\_List.txt)

function

[EXPERIMENT,CONDITION,NEURONCLASS,NORMALIZE\_ROI,NORMALIZE\_FLY,LAYER,COLORS,pairedData,...

NUMBER\_OF\_VARIABLES,NUMBER\_OF\_GROUPS,variable\_str,gen\_str,DataNames,Statistics,Correction]...

=load\_experiment\_conditions(Automatized,EXPERIMENT,CONDITION,NEURONCLASS,NORMALIZE\_ROI,...

NORMALIZE\_FLY,LAYER,COLORS,pairedData,NUMBER\_OF\_VARIABLES,NUMBER\_OF\_GROUPS,variable\_str,gen\_str,DataNames,Statistics,Correction)

if Automatized

disp('----- Automatized Analysis MODE -----')

pdatapath=('C:\MATLAB\_FOLDER\2p\2p\_pData');

cd(pdatapath);

[EXPERIMENT,CONDITION,NEURONCLASS,NORMALIZE\_ROI,NORMALIZE\_FLY,LAYER,COLORS,pairedData,...

NUMBER\_OF\_VARIABLES,NUMBER\_OF\_GROUPS,variable\_str,gen\_str,DataNames,Statistics,Correction]...

=textread('Experiments\_List\_2.txt','%s %s %s %s %s %s %s %s %f %f %q %q %q %s %s\r','headerlines',1,'delimiter','\t');

% Transforming all logical strings to logicals

pairedData = strcmpi(pairedData, 'true');

NORMALIZE\_ROI = strcmpi(NORMALIZE\_ROI, 'true');

NORMALIZE\_FLY = strcmpi(NORMALIZE\_FLY, 'true');

else

disp('----- Not Automatized Analysis MODE -----');

end

---

## Moving edge pre- analysis

Script name: find\_centers\_ROIs\_moving\_edge\_8dir\_elife.m

%% Find centers for manually drawn ROIs for 4 or 8 directions moving-edge stimulation. The input of this script is in a folder containing pData files. It finds automatic ROI centers based on response maximum for ON and OFF epochs, separately. It also calculates dF/F for the responses and stores it in a variable

% Authors: Miriam Henning and Sebastian Molina-Obando

```
clc;
clear all;
close all;
```

```
%add the path of needed functions
addpath(genpath('C:\MATLAB_FOLDER\TP_code_Seb'));
pData_Folder = uigetdir;
cd(pData_Folder);
N_pDATA=dir('*_pData.mat');
```

```
for pData=1:size(N_pDATA,1)
```

```
    x{1,1}=load(N_pDATA(pDATA).name); % Loading pData file
    Stimulus=x{1,1}.struct.stim_type; % Checking stimulus
```

```
    mb_str =
    {'DriftingEdge_LumDecLumInc_1period_20degPerSec_90deg_BlankRand_4Dirs_optimized'};
    mb_str2 = {''};
    mb_str3={''};
    mb_str4={''};
```

```
    mb_str5={'DriftingEdge_LumDecLumInc_1period_20degPerSec_90deg_BlankRand_8Dirs_optimized'};
```

```
    GO=0;
```

```
    if(strcmp(x{1,1}.struct.stim_type,mb_str))
        GO=1;
    elseif (strcmp(x{1,1}.struct.stim_type,mb_str2))
        GO=1;
    elseif (strcmp(x{1,1}.struct.stim_type,mb_str3))
        GO=2;
    elseif (strcmp(x{1,1}.struct.stim_type,mb_str4))
        GO=2;
    elseif (strcmp(x{1,1}.struct.stim_type,mb_str5))
        GO=3;
    end
```

```
% Only pData with moving edges stimulation will be analysed
```

```
if GO==1||3
```

```
    if GO==1
```



```

    NUM_EPOCHS=4;
elseif GO==3
    NUM_EPOCHS=8;
end

```

% Preparing the matrices analyze the data

```

DATA_strct=eval(['x{1,1}.strct']);
n_cells = size(DATA_strct.masks,2);

```

% Finding the Epochs of stimulus presentation

```

fstimval=DATA_strct.fstimval;
changes=diff(fstimval);
start_epoch=find(changes>0)+1;
end_epoch=find(changes<0);
dur=diff([start_epoch(1:length(end_epoch)),end_epoch]);
avdur=min(dur);
ep_all=nan(size(end_epoch,1), avdur);

```

%ep\_all will contain the range of frames belonging to each stimulus epoch

```

for pp=1:length(end_epoch)
    epoch=start_epoch(pp):start_epoch(pp)+avdur-1;
    ep_all(pp,:)=epoch;
end

```

```

Epochs=ep_all';
dur=avdur;

```

Stim=DATA\_strct.fstimval(Epochs(2,:)); % Stimulus identity for each epoch

%Prepare matrices

```

resp_dir=nan(dur,NUM_EPOCHS);
AV_ROIS_resp=cell(1, n_cells); % This is not yet dF/F it is not even background
subtracted
centers = zeros(NUM_EPOCHS,n_cells);

```

```

stimuluspos=x{1,1}.strct.fstimpos1;
stimulus=stimuluspos(Epochs(:,1));

```

```

fps=x{1,1}.strct.xml.framerate;

```

```

Epochs=Epochs(:,1:end-1); % taking out last epoch, because it can be interrupted
Stim=Stim(1:end-1);
Epochs=[Epochs;Epochs(end,:)+1];

```

if mod(length(Epochs),2) %If length uneven

```

    EPLength=length(Epochs)+1;
    Epochs=[Epochs;Epochs(end,:)+1];
else
    EPLength=length(Epochs);
end

```

```

ONedgeResp=nan(EPLength/2,NUM_EPOCHS);
OFFedgeResp=nan(EPLength/2,NUM_EPOCHS);
resp_dir=nan(EPLength,NUM_EPOCHS);

```

% Taking the OFF-edge and ON-edge indices to cut the responses of each ROI/cell

```

for k=1:n_cells %for each cell
    ROI_Resp=DATA_strct.avSignal1(k,:); % Not background subtracted

    Mask=DATA_strct.masks{1,k}; % Mask of this cell
    centers(k) = 500; % preset to default values;

    try
        BaseLine=mean(DATA_strct.BaseLine,3); %If a baseline sequence is there, take it
        Baselineresp=BaseLine(Mask);
        avBaselineresp=mean(Baselineresp); % Average Baseline response
    catch
        BaseLine=mean(DATA_strct.avSignal1(k,:)); % If no baseline recorded,the mean of
the whole trace is taken as baseline.
        avBaselineresp=BaseLine; % Average Baseline response
    end

    %dF/F Calculation.(F(stim)-F(rest))/F(rest)
    ROI_Resp_DF=(ROI_Resp-avBaselineresp)/avBaselineresp;

    %Trial averaging
    for kk=1:NUM_EPOCHS % loop through all directions of movement
        Double=find(Stim==kk);
        if length(Double)>1
            allepochs=[];
            for pp=1:length(Double)
                allepochs=[allepochs; ROI_Resp_DF(Epochs(:,Double(pp)))];
            end
            resp_dir(:,kk)=mean(allepochs,1); % Mean ROI response across repetitions of
stimulus direction
        else
            resp_dir(:,kk)= ROI_Resp_DF(Epochs(:,Double));
        end
        OFFedgeResp(:,kk)=resp_dir(1:round(length(resp_dir)/2),kk);
        ONedgeResp(:,kk)=resp_dir(round(length(resp_dir)/2)+1:length(resp_dir),kk);
    end

    %Response maximum
    Centers_i=zeros(NUM_EPOCHS,1);
    for kk=1:NUM_EPOCHS %for each stimulus direction
        % calculate the maximum of the response, which is later
        % used to shift the response into the center.

        [maxvON,TmaxON]=max(ONedgeResp(:,kk));
        [maxvOFF,TmaxOFF]=max(OFFedgeResp(:,kk));

        %Is the response to the OFF edge higher or to ON edge?
        OFFneuron=maxvOFF>maxvON;

        if OFFneuron ==1 % If response to OFF edge is higher

            if maxvOFF>mean(OFFedgeResp(:,kk))+1*std(OFFedgeResp(:,kk)) % If
response pass a threshold...
                Centers_i(kk)=TmaxOFF; %... the max response is shifted to the center.
            end
        end
    end

```

```

elseif OFFneuron==0 % If response of ON edge is higher

    if maxvON>mean(ONedgeResp(:,kk))+1*std(ONedgeResp(:,kk)) % If response
pass a threshold...
        Centers_i(kk)=TmaxON; %... the max response is shifted to the center.
    end
end

end

%Contains the centers (directions) of each ROIs
centers(:,k)=Centers_i;

Middle=round(size(ONedgeResp,1)/2);
shifts=zeros(NUM_EPOCHS,1);
for ll=1:NUM_EPOCHS;
    if Centers_i(ll)>0;
        shifts(ll) = Middle- Centers_i(ll);
    end
end

resp_dir_cut=zeros(size(resp_dir));

for lll=1:NUM_EPOCHS
    resp_dir_cut(:,lll)=circshift(resp_dir(:,lll),shifts(lll));
end

AV_ROIS_resp{1,k}=resp_dir_cut';
end

end

%Saving centers data in each pData file
if GO==1||2||3

    x{1,1}.struct.centers=centers;
    x{1,1}.struct.AV_ROIS_resp=AV_ROIS_resp;

    out = x{1,1}.struct;
    struct=out;
    if(isfield(struct,'ch1'))
        struct = rmfield(struct,'ch1');
        struct = rmfield(struct,'ch1b');
        struct = rmfield(struct,'ch3');
    end

    pathroot=pData_Folder;
    cd(pathroot)
    save(N_pDATA(pDATA).name,'struct' );
end
end

```

---



---

## Moving edge analysis

Script name: moving\_edge\_analysis\_elife.m

Sub-functions needed:

create\_experimental\_conditions\_structure\_elife.m

load\_neuron\_data10Hz\_byLayer\_avResp\_elife.m

aggregate\_avROIResp\_elife.m

plot\_err\_patch\_v2.m

% This script analyses moving ON and OFF edges from manually selected ROIs. It generates some plots to visualize the data and saves a matlab file with all important variables for future use.

% Authors: Miriam Henning and Sebastian Molina-Obando

```
% clc;  
clear all;  
close all;
```

%% USER INPUT: CONSTANTS

savingData = true; %"True" for saving data (variables and plots) in a folder in your computer. Otherwise, write "false".

%Naming folders to store data

```
save_as= 'D Mi 2.5uM PTX Control'; %'+ +', 'D +', 'Df +', 'D Df', '+ + 2.5uM PTX', '+ + 2.5uM PTX  
Control', 'D Mi',  
save_in_folder =  
'C:\MATLAB_FOLDER\2p\2p_pData\T4_T5_Layer_Data\T4_T5_LexA_LexAop_GCaMP6f_rec2  
8\LumDecLumInc_8Dir_opt';
```

% Choose (comment out) the experimental conditions. Choose only one.

```
%  
Condition='i_drifting_edge_20degps_Rand8DIR_IncDec_opt.*i_T4_T5_LexA_LexAop_GCaMP  
6f_28rec.*i_Control';
```

```
%  
Condition='i_drifting_edge_20degps_Rand8DIR_IncDec_opt.*i_T4_T5_LexA_LexAop_GCaMP  
6f_28rec_GluClalphaFlpSTOP.*i_Control.*i_GluCla_KD_exp';
```

```
%  
Condition='i_drifting_edge_20degps_Rand8DIR_IncDec_opt.*i_T4_T5_LexA_LexAop_GCaMP  
6f_28rec_DfED6025.*i_PTX_Control';
```

```
%  
Condition='i_drifting_edge_20degps_Rand8DIR_IncDec_opt.*i_T4_T5_LexA_LexAop_GCaMP  
6f_28rec_GluClalphaFlpSTOP_DfED6025.*i_Control.*i_GluCla_KD_exp';
```

```
%  
Condition='i_drifting_edge_20degps_Rand8DIR_IncDec_opt.*i_T4_T5_LexA_LexAop_GCaMP  
6f_28rec_GluCla_MiMIC_14426_GluCla_Flp_D.*i_GluCla_KO_exp_PTX_2_5uM';
```

```

%
Condition='i_drifting_edge_20degps_Rand8DIR_IncDec_opt.*i_T4_T5_LexA_LexAop_GCaMP
6f_28rec_GluCla_MiMIC_14426_GluCla_Flp_D.*i_PTX_2_5uM.*i_Exp1.*i_PTX_exp_2_5uM';
%
Condition='i_drifting_edge_20degps_Rand8DIR_IncDec_opt.*i_T4_T5_LexA_LexAop_GCaMP
6f_28rec_GluCla_MiMIC_14426_GluCla_Flp_D.*i_PTX_2_5uM_3min.*i_Exp1.*i_PTX_exp_2_5
uM';

Condition='i_drifting_edge_20degps_Rand8DIR_IncDec_opt.*i_T4_T5_LexA_LexAop_GCaMP
6f_28rec_GluCla_MiMIC_14426_GluCla_Flp_D.*i_Exp2.*i_GluCla_KO_exp_PTX_2_5uM';

%
Condition='i_drifting_edge_20degps_Rand8DIR_IncDec_opt.*i_T4_T5_LexA_LexAop_GCaMP
6f_28rec_GluCla_MiMIC_14426.*i_Exp1.*i_GluCla_KO_exp';

%Condition='i_drifting_edge_20degps_Rand8DIR_IncDec_opt.*i_T4_T5_LexA_LexAop_GCaM
P6f_28rec.*i_PTX_Control.*i_PTX_exp_2_5uM';
%
Condition='i_drifting_edge_20degps_Rand8DIR_IncDec_opt.*i_T4_T5_LexA_LexAop_GCaMP
6f_28rec.*i_PTX_2_5uM.*i_PTX_exp_2_5uM';

%
Condition='i_drifting_edge_20degps_Rand8DIR_IncDec_opt.*i_T4_T5_LexA_LexAop_GCaMP
6f_28rec.*i_PTX_Control.*i_Exp1.*i_PTX_exp_5uM';
%
Condition='i_drifting_edge_20degps_Rand8DIR_IncDec_opt.*i_T4_T5_LexA_LexAop_GCaMP
6f_28rec.*i_PTX_5uM.*i_Exp1.*i_PTX_exp_5uM';

%
Condition='i_drifting_edge_20degps_Rand8DIR_IncDec_opt.*i_T4_T5_LexA_LexAop_GCaMP
6f_28rec.*i_PTX_Control.*i_Exp1.*i_PTX_exp_100uM';
%
Condition='i_drifting_edge_20degps_Rand8DIR_IncDec_opt.*i_T4_T5_LexA_LexAop_GCaMP
6f_28rec.*i_PTX_100uM.*i_Exp1.*i_PTX_exp_100uM';

%
Condition='i_drifting_edge_20degps_Rand8DIR_IncDec_opt.*i_T4_T5_LexA_LexAop_GCaMP
6f_28rec.*i_PTX_Control_1min.*i_Exp1.*i_PTX_exp_100uM';
%
Condition='i_drifting_edge_20degps_Rand8DIR_IncDec_opt.*i_T4_T5_LexA_LexAop_GCaMP
6f_28rec.*i_PTX_100uM_1min.*i_Exp1.*i_PTX_exp_100uM';

%
Condition='i_drifting_edge_20degps_Rand8DIR_IncDec_opt.*i_T4_T5_LexA_LexAop_GCaMP
6f_28rec.*i_MPEP_Control.*i_Exp1.*i_MPEP_exp_100uM';
%
Condition='i_drifting_edge_20degps_Rand8DIR_IncDec_opt.*i_T4_T5_LexA_LexAop_GCaMP
6f_28rec.*i_MPEP_100uM.*i_Exp1.*i_MPEP_exp_100uM';

%% Analysis

%add the path of needed functions
addpath(genpath('C:\MATLAB_FOLDER\TP_code_Seb'));
pdatapath='C:\MATLAB_FOLDER\2p\2p_pData';
addpath(pdatapath);
cd(pdatapath);

```

```

database_select_samples_seb; % Loading information from database
experimental_conditions = find(eval(Condition)); %% Concatenation of all conditions that
define the experimental GENOTYPE

```

```

% Creating a data structure with info about pdata to load:
ExpCondStrct = create_experimental_conditions_structure_elif(experimental_conditions);

```

```

% Loading all the pDatas and save info in a structure for each LAYER.
%Here we interpolates our data at 10 Hz

```

```

T4T5_LPA = load_neuron_data10Hz_byLayer_avResp_elif(ExpCondStrct,pdatapath,'LPA');
T4T5_LPB = load_neuron_data10Hz_byLayer_avResp_elif(ExpCondStrct,pdatapath,'LPB');
T4T5_LPC = load_neuron_data10Hz_byLayer_avResp_elif(ExpCondStrct,pdatapath,'LPC');
T4T5_LPD = load_neuron_data10Hz_byLayer_avResp_elif(ExpCondStrct,pdatapath,'LPD');
T4T5_M9 = load_neuron_data10Hz_byLayer_avResp_elif(ExpCondStrct,pdatapath,'M9');
try
    T4T5_Lo = load_neuron_data10Hz_byLayer_avResp_elif(ExpCondStrct,pdatapath,'Lo');
    T4T5_Lo_agg=aggregate_avROIResp_elif(T4T5_Lo);
    Lo_LAYER = 1;
catch
    T4T5_Lo = 'NO Lo LAYER in this data set';
    T4T5_Lo_agg = 'NO Lo LAYER in this data set';
    disp('>>>>>> This Data set has NO Lo LAYER');
    Lo_LAYER = 0;
end

```

```

% Aggregation (trial average) of all selected ROI responses

```

```

T4T5_LPA_agg=aggregate_avROIResp_elif(T4T5_LPA);
T4T5_LPB_agg=aggregate_avROIResp_elif(T4T5_LPB);
T4T5_LPC_agg=aggregate_avROIResp_elif(T4T5_LPC);
T4T5_LPD_agg=aggregate_avROIResp_elif(T4T5_LPD);
T4T5_M9_agg=aggregate_avROIResp_elif(T4T5_M9);

```

```

%% Plotting

```

```

% *****
% PLOTS - by FLY
% *****

```

```

COLOR_OF_PLOT_A = [0 .5 0]; % GREEN
COLOR_CLOUD_A = [.5 .7 .5]; % GREEN cloud

```

```

COLOR_OF_PLOT_B = [0 0 1]; %BLUE;
COLOR_CLOUD_B = [.5 .5 1]; %BLUE cloud

```

```

COLOR_OF_PLOT_C = [1 0 0]; %RED
COLOR_CLOUD_C = [1 .5 .5]; %RED cloud

```

```

COLOR_OF_PLOT_D = [.7 .7 0];%YELLOW
COLOR_CLOUD_D = [.9 .9 .5]; %YELLOW cloud

```

```
COLOR_OF_PLOT_M9 = [99/256 99/256 99/256]; %GREY
COLOR_CLOUD_M9 = [189/256 189/256 189/256]; %GREY cloud
```

```
TRACE_OFFSET_PLOT = 6; % spacing in dF/F between the traces for the 4 directions
```

```
t=[0.1:0.1:size(T4T5_LPA_agg.rats,3)/10];
```

```
F1= figure(1);
```

```
subplot(2,2,1);hold on; %Layer 1/A
```

```
patch([0 4 4 0],[-0.5 -0.5 45 45],[0.85 0.85 0.85],'EdgeColor','none');
set(gca, 'XLim', [0 8])
set(gca, 'YLim', [-0.5 45])
```

```
plot(t,squeeze(T4T5_LPA_agg.MeanOF_Cells(:,1,:))+0*TRACE_OFFSET_PLOT,'Color',COLOR_OF_PLOT_A);
```

```
plot(t,squeeze(T4T5_LPA_agg.MeanOF_Cells(:,2,:))+1*TRACE_OFFSET_PLOT,'Color',COLOR_OF_PLOT_A);
```

```
plot(t,squeeze(T4T5_LPA_agg.MeanOF_Cells(:,3,:))+2*TRACE_OFFSET_PLOT,'Color',COLOR_OF_PLOT_A);
```

```
plot(t,squeeze(T4T5_LPA_agg.MeanOF_Cells(:,4,:))+3*TRACE_OFFSET_PLOT,'Color',COLOR_OF_PLOT_A);
```

```
plot(t,squeeze(T4T5_LPA_agg.MeanOF_Cells(:,5,:))+4*TRACE_OFFSET_PLOT,'Color',COLOR_OF_PLOT_A);
```

```
plot(t,squeeze(T4T5_LPA_agg.MeanOF_Cells(:,6,:))+5*TRACE_OFFSET_PLOT,'Color',COLOR_OF_PLOT_A);
```

```
plot(t,squeeze(T4T5_LPA_agg.MeanOF_Cells(:,7,:))+6*TRACE_OFFSET_PLOT,'Color',COLOR_OF_PLOT_A);
```

```
plot(t,squeeze(T4T5_LPA_agg.MeanOF_Cells(:,8,:))+7*TRACE_OFFSET_PLOT,'Color',COLOR_OF_PLOT_A);
```

```
title('Layer1/A')
```

```
subplot(2,2,2);hold on; %Layer 2/B
```

```
patch([0 4 4 0],[-0.5 -0.5 45 45],[0.85 0.85 0.85],'EdgeColor','none');
set(gca, 'XLim', [0 8])
set(gca, 'YLim', [-0.5 45])
```

```
plot(t,squeeze(T4T5_LPB_agg.MeanOF_Cells(:,1,:))+0*TRACE_OFFSET_PLOT,'Color',COLOR_OF_PLOT_B);
```

```
plot(t,squeeze(T4T5_LPB_agg.MeanOF_Cells(:,2,:))+1*TRACE_OFFSET_PLOT,'Color',COLOR_OF_PLOT_B);
```

```
plot(t,squeeze(T4T5_LPB_agg.MeanOF_Cells(:,3,:))+2*TRACE_OFFSET_PLOT,'Color',COLOR_OF_PLOT_B);
```

```
plot(t,squeeze(T4T5_LPB_agg.MeanOF_Cells(:,4,:))+3*TRACE_OFFSET_PLOT,'Color',COLOR_OF_PLOT_B);
```

```
plot(t,squeeze(T4T5_LPB_agg.MeanOF_Cells(:,5,:))+4*TRACE_OFFSET_PLOT,'Color',COLOR_OF_PLOT_B);
```

```
plot(t,squeeze(T4T5_LPB_agg.MeanOF_Cells(:,6,:))+5*TRACE_OFFSET_PLOT,'Color',COLOR_OF_PLOT_B);
```

```
plot(t,squeeze(T4T5_LPB_agg.MeanOF_Cells(:,7,:))+6*TRACE_OFFSET_PLOT,'Color',COLOR_OF_PLOT_B);
```

```
plot(t,squeeze(T4T5_LPB_agg.MeanOF_Cells(:,8,:))+7*TRACE_OFFSET_PLOT,'Color',COLOR_OF_PLOT_B);
```

```
title('Layer2/B')
```

```
subplot(2,2,3);hold on; %Layer 3/C
```

```
patch([0 4 4 0],[-0.5 -0.5 45 45],[0.85 0.85 0.85],'EdgeColor','none');  
set(gca, 'XLim', [0 8])  
set(gca, 'YLim', [-0.5 45])
```

```
plot(t,squeeze(T4T5_LPC_agg.MeanOF_Cells(:,1,:))+0*TRACE_OFFSET_PLOT,'Color',COLOR_OF_PLOT_C);
```

```
plot(t,squeeze(T4T5_LPC_agg.MeanOF_Cells(:,2,:))+1*TRACE_OFFSET_PLOT,'Color',COLOR_OF_PLOT_C);
```

```
plot(t,squeeze(T4T5_LPC_agg.MeanOF_Cells(:,3,:))+2*TRACE_OFFSET_PLOT,'Color',COLOR_OF_PLOT_C);
```

```
plot(t,squeeze(T4T5_LPC_agg.MeanOF_Cells(:,4,:))+3*TRACE_OFFSET_PLOT,'Color',COLOR_OF_PLOT_C);
```

```
plot(t,squeeze(T4T5_LPC_agg.MeanOF_Cells(:,5,:))+4*TRACE_OFFSET_PLOT,'Color',COLOR_OF_PLOT_C);
```

```
plot(t,squeeze(T4T5_LPC_agg.MeanOF_Cells(:,6,:))+5*TRACE_OFFSET_PLOT,'Color',COLOR_OF_PLOT_C);
```

```
plot(t,squeeze(T4T5_LPC_agg.MeanOF_Cells(:,7,:))+6*TRACE_OFFSET_PLOT,'Color',COLOR_OF_PLOT_C);
```

```
plot(t,squeeze(T4T5_LPC_agg.MeanOF_Cells(:,8,:))+7*TRACE_OFFSET_PLOT,'Color',COLOR_OF_PLOT_C);
```

```
title('Layer3/C')
```

```
subplot(2,2,4);hold on; %Layer 4/D
```

```
patch([0 4 4 0],[-0.5 -0.5 45 45],[0.85 0.85 0.85],'EdgeColor','none');  
set(gca, 'XLim', [0 8])  
set(gca, 'YLim', [-0.5 45])
```



```
plot(t,squeeze(T4T5_LPD_agg.MeanOF_Cells(:,1,:))+0*TRACE_OFFSET_PLOT,'Color',COLOR_OF_PLOT_D);
```

```
plot(t,squeeze(T4T5_LPD_agg.MeanOF_Cells(:,2,:))+1*TRACE_OFFSET_PLOT,'Color',COLOR_OF_PLOT_D);
```

```
plot(t,squeeze(T4T5_LPD_agg.MeanOF_Cells(:,3,:))+2*TRACE_OFFSET_PLOT,'Color',COLOR_OF_PLOT_D);
```

```
plot(t,squeeze(T4T5_LPD_agg.MeanOF_Cells(:,4,:))+3*TRACE_OFFSET_PLOT,'Color',COLOR_OF_PLOT_D);
```

```
plot(t,squeeze(T4T5_LPD_agg.MeanOF_Cells(:,5,:))+4*TRACE_OFFSET_PLOT,'Color',COLOR_OF_PLOT_D);
```

```
plot(t,squeeze(T4T5_LPD_agg.MeanOF_Cells(:,6,:))+5*TRACE_OFFSET_PLOT,'Color',COLOR_OF_PLOT_D);
```

```
plot(t,squeeze(T4T5_LPD_agg.MeanOF_Cells(:,7,:))+6*TRACE_OFFSET_PLOT,'Color',COLOR_OF_PLOT_D);
```

```
plot(t,squeeze(T4T5_LPD_agg.MeanOF_Cells(:,8,:))+7*TRACE_OFFSET_PLOT,'Color',COLOR_OF_PLOT_D);
```

```
title('Layer4/D')
```

```
%%
%*****
% PLOTS - average across FLY
%*****
```

```
F2= figure(2);
subplot(2,2,1)
patch([0 4 4 0],[-0.5 -0.5 45 45],[0.85 0.85 0.85],'EdgeColor','none');
set(gca, 'XLim', [0 8])
set(gca, 'YLim', [-0.5 45])
```

```
for i=1:8;
    plot_err_patch_v2(t, TRACE_OFFSET_PLOT*(i-1)+squeeze(nanmean(T4T5_LPA_agg.MeanOF_Cells(:,i,:),1)),...
```

```
squeeze(nanstd(T4T5_LPA_agg.MeanOF_Cells(:,i,:),1)),COLOR_OF_PLOT_A,COLOR_CLOUD_A);
```

```
    line([t(1) t(end)],[TRACE_OFFSET_PLOT*(i-1) TRACE_OFFSET_PLOT*(i-1)],...
        'color',[0 0 0],'LineStyle','--');
end
```

```
title(['T4&T5 LayerA - NFlies = ', num2str(size(T4T5_LPA_agg.MeanOF_Cells,1))])
```

```
subplot(2,2,2)
patch([0 4 4 0],[-0.5 -0.5 45 45],[0.85 0.85 0.85],'EdgeColor','none');
set(gca, 'XLim', [0 8])
set(gca, 'YLim', [-0.5 45])
```

```

for i=1:8;
    plot_err_patch_v2(t, TRACE_OFFSET_PLOT*(i-
1)+squeeze(nanmean(T4T5_LPB_agg.MeanOF_Cells(:,i,:),1))',...

squeeze(nanstd(T4T5_LPB_agg.MeanOF_Cells(:,i,:),1)),COLOR_OF_PLOT_B,COLOR_CLOU
D_B);
    line([t(1) t(end)],[TRACE_OFFSET_PLOT*(i-1) TRACE_OFFSET_PLOT*(i-1)],...
'color',[0 0 0],'LineStyle','--');
end

title(['T4&T5 LayerB - NFlies = ', num2str(size(T4T5_LPB_agg.MeanOF_Cells,1))])

```

```

subplot(2,2,3)
patch([0 4 4 0],[-0.5 -0.5 45 45],[0.85 0.85 0.85],'EdgeColor','none');
set(gca, 'XLim', [0 8])
set(gca, 'YLim', [-0.5 45])

for i=1:8;
    plot_err_patch_v2(t, TRACE_OFFSET_PLOT*(i-
1)+squeeze(nanmean(T4T5_LPC_agg.MeanOF_Cells(:,i,:),1))',...

squeeze(nanstd(T4T5_LPC_agg.MeanOF_Cells(:,i,:),1)),COLOR_OF_PLOT_C,COLOR_CLOU
D_C);
    line([t(1) t(end)],[TRACE_OFFSET_PLOT*(i-1) TRACE_OFFSET_PLOT*(i-1)],...
'color',[0 0 0],'LineStyle','--');
end

title(['T4&T5 LayerC - NFlies = ', num2str(size(T4T5_LPC_agg.MeanOF_Cells,1))])

```

```

subplot(2,2,4)
patch([0 4 4 0],[-0.5 -0.5 45 45],[0.85 0.85 0.85],'EdgeColor','none');
set(gca, 'XLim', [0 8])
set(gca, 'YLim', [-0.5 45])

for i=1:8;
    plot_err_patch_v2(t, TRACE_OFFSET_PLOT*(i-
1)+squeeze(nanmean(T4T5_LPD_agg.MeanOF_Cells(:,i,:),1))',...

squeeze(nanstd(T4T5_LPD_agg.MeanOF_Cells(:,i,:),1)),COLOR_OF_PLOT_D,COLOR_CLOU
D_D);
    line([t(1) t(end)],[TRACE_OFFSET_PLOT*(i-1) TRACE_OFFSET_PLOT*(i-1)],...
'color',[0 0 0],'LineStyle','--');
end

title(['T4&T5 LayerD - NFlies = ', num2str(size(T4T5_LPD_agg.MeanOF_Cells,1))])

```

```
%%
```

```

% *****
% PLOTS - by FLY Medulla Layer
% *****

```

```
F3= figure(3);
```

```

hold on; %Layer M9

patch([0 4 4 0],[-0.5 -0.5 45 45],[0.85 0.85 0.85],'EdgeColor','none');
set(gca, 'XLim', [0 8])
set(gca, 'YLim', [-0.5 45])

plot(t,squeeze(T4T5_M9_agg.MeanOF_Cells(:,1,:))+0*TRACE_OFFSET_PLOT,'Color',COLOR_OF_PLOT_M9);

plot(t,squeeze(T4T5_M9_agg.MeanOF_Cells(:,2,:))+1*TRACE_OFFSET_PLOT,'Color',COLOR_OF_PLOT_M9);

plot(t,squeeze(T4T5_M9_agg.MeanOF_Cells(:,3,:))+2*TRACE_OFFSET_PLOT,'Color',COLOR_OF_PLOT_M9);

plot(t,squeeze(T4T5_M9_agg.MeanOF_Cells(:,4,:))+3*TRACE_OFFSET_PLOT,'Color',COLOR_OF_PLOT_M9);

plot(t,squeeze(T4T5_M9_agg.MeanOF_Cells(:,5,:))+4*TRACE_OFFSET_PLOT,'Color',COLOR_OF_PLOT_M9);

plot(t,squeeze(T4T5_M9_agg.MeanOF_Cells(:,6,:))+5*TRACE_OFFSET_PLOT,'Color',COLOR_OF_PLOT_M9);

plot(t,squeeze(T4T5_M9_agg.MeanOF_Cells(:,7,:))+6*TRACE_OFFSET_PLOT,'Color',COLOR_OF_PLOT_M9);

plot(t,squeeze(T4T5_M9_agg.MeanOF_Cells(:,8,:))+7*TRACE_OFFSET_PLOT,'Color',COLOR_OF_PLOT_M9);

title('Layer M9')

F4= figure(4);
patch([0 4 4 0],[-0.5 -0.5 45 45],[0.85 0.85 0.85],'EdgeColor','none');
set(gca, 'XLim', [0 8])
set(gca, 'YLim', [-0.5 45])

for i=1:8;
    plot_err_patch_v2(t, TRACE_OFFSET_PLOT*(i-1)+squeeze(nanmean(T4T5_M9_agg.MeanOF_Cells(:,i,:),1)),...

squeeze(nanstd(T4T5_M9_agg.MeanOF_Cells(:,i,:),1)),COLOR_OF_PLOT_M9,COLOR_CLOUD_M9);
    line([t(1) t(end)],[TRACE_OFFSET_PLOT*(i-1) TRACE_OFFSET_PLOT*(i-1)],...
        'color',[0 0 0],'LineStyle','--');
end

title(['T4&T5 Layer M9 - NFlies = ', num2str(size(T4T5_LPA_agg.MeanOF_Cells,1))])

%%
%%

% *****
% PLOTS - by FLY Lo Layer

```

```

%*****

if Lo_LAYER
    F5= figure(5);

    hold on; %Layer Lo

    patch([0 4 4 0],[-0.5 -0.5 45 45],[0.85 0.85 0.85],'EdgeColor','none');
    set(gca, 'XLim', [0 8])
    set(gca, 'YLim', [-0.5 45])

    plot(t,squeeze(T4T5_Lo_agg.MeanOF_Cells(:,1,:))+0*TRACE_OFFSET_PLOT,'Color',COLOR_
    OF_PLOT_M9);

    plot(t,squeeze(T4T5_Lo_agg.MeanOF_Cells(:,2,:))+1*TRACE_OFFSET_PLOT,'Color',COLOR_
    OF_PLOT_M9);

    plot(t,squeeze(T4T5_Lo_agg.MeanOF_Cells(:,3,:))+2*TRACE_OFFSET_PLOT,'Color',COLOR_
    OF_PLOT_M9);

    plot(t,squeeze(T4T5_Lo_agg.MeanOF_Cells(:,4,:))+3*TRACE_OFFSET_PLOT,'Color',COLOR_
    OF_PLOT_M9);

    plot(t,squeeze(T4T5_Lo_agg.MeanOF_Cells(:,5,:))+4*TRACE_OFFSET_PLOT,'Color',COLOR_
    OF_PLOT_M9);

    plot(t,squeeze(T4T5_Lo_agg.MeanOF_Cells(:,6,:))+5*TRACE_OFFSET_PLOT,'Color',COLOR_
    OF_PLOT_M9);

    plot(t,squeeze(T4T5_Lo_agg.MeanOF_Cells(:,7,:))+6*TRACE_OFFSET_PLOT,'Color',COLOR_
    OF_PLOT_M9);

    plot(t,squeeze(T4T5_Lo_agg.MeanOF_Cells(:,8,:))+7*TRACE_OFFSET_PLOT,'Color',COLOR_
    OF_PLOT_M9);

    title('Layer Lo')

    F6= figure(6);
    patch([0 4 4 0],[-0.5 -0.5 45 45],[0.85 0.85 0.85],'EdgeColor','none');
    set(gca, 'XLim', [0 8])
    set(gca, 'YLim', [-0.5 45])

    for i=1:8;
        plot_err_patch_v2(t, TRACE_OFFSET_PLOT*(i-
        1)+squeeze(nanmean(T4T5_Lo_agg.MeanOF_Cells(:,i,:),1)),...

squeeze(nanstd(T4T5_Lo_agg.MeanOF_Cells(:,i,:),1)),COLOR_OF_PLOT_M9,COLOR_CLOU
D_M9);
        line([t(1) t(end)],[TRACE_OFFSET_PLOT*(i-1) TRACE_OFFSET_PLOT*(i-1)],...
        'color',[0 0 0],'LineStyle','--');
    end

    title(['T4&T5 Layer Lo - NFlies = ', num2str(size(T4T5_LPA_agg.MeanOF_Cells,1))])

end

```

%% Saving Data

if savingData

```
set(F1,'PaperSize', [10 10])
set(F2,'PaperSize', [10 10])
set(F3,'PaperSize', [10 10])
set(F4,'PaperSize', [10 10])
```

```
saveas(F2, [save_in_folder, '\', save_as, 'Average T4&T5 responses to Edges manually drawn
ROIs 8Dir_Ax.pdf'])
```

```
saveas(F4, [save_in_folder, '\', save_as, 'Average T4&T5 responses to Edges manually drawn
ROIs 8Dir_M9.pdf'])
```

```
try
```

```
set(F5,'PaperSize', [10 10])
```

```
set(F6,'PaperSize', [10 10])
```

```
saveas(F6, [save_in_folder, '\', save_as, 'Average T4&T5 responses to Edges manually
drawn ROIs 8Dir_Lo.pdf'])
```

```
catch
```

```
disp('>>>>>> NO Plots for Lo LAYER');
```

```
end
```

```
save([save_in_folder, '\',
save_as, 'processed_Data_manualROIs'], 'T4T5_LPA', 'T4T5_LPB', 'T4T5_LPC', 'T4T5_LPD', 'T4T
5_M9', 'T4T5_Lo', 'T4T5_LPA_agg', 'T4T5_LPB_agg', 'T4T5_LPC_agg', 'T4T5_LPD_agg', 'T4T5_M
9_agg', 'T4T5_Lo_agg');
```

```
end
```

---

## Moving edge analysis-related script

Script name: load\_neuron\_data10Hz\_byLayer\_avResp\_elife.m

% This function figures out, among all recorded ROIs, which ROI belongs  
% to a specific layer. The identification number of each ROIs in each layer  
% is specified in the "layer" column of the masterfolder txt file. For all  
% selected ROIs, important information is extracted and created. E.g. the stimulus and  
% response time vectors are generated and  
% extrapolated to 10 Hz.

```
function out=load_neuron_data10Hz_byLayer_avResp_elife(in, locdir, layerTypeWanted)
```

```
% Reads the masterfolder and separates the different categories
```

```
[fname, datetime, frames, zdepth, tottime, stimbouts, locnum, ...
```

```
activecells, inverted, stimcode, quality, driver, ...
```

```
moving, layer, wavelength, flyID, responsively, condition1, condition2, condition3] ...
```

```
=textread('MASTER_foldersummary_Seb.txt', ...
```

```
'%s %s %f %f %f %f %f %s %f %s %f %s %f %f %f %s %s %s \r', ...
```

```
'headerlines', 1, 'delimiter', 't');
```

```
%% Reads now string for layers
```

```
currd=pwd;
```

```
cd(locdir);
```

```
count=1;
```

```

for ii=1:length(in) % all the presentations of the correct stimulus by ROI

    qq=in(ii).cell; % which ROI 'cell' we are currently on...
    ss=strcmpi(in(ii).name,fname); % logical that tells you which LDM out of all of them we are
    currently on.
    if exist(in(ii).name) * (qq>0)
        x=load(in(ii).name); % open that data file

        currLayerInfo=layer{ss};
        % now use this info to determine if the current "cell" value stored
        % in qq matches any of the numbers that follow the "layer" that
        % we want e.g. LPA 1:5
        str_i_layer=strfind(currLayerInfo, layerTypeWanted); % gives you the first location of
        layerTypeWanted in currLayerInfo

        if(~isempty(str_i_layer))
            str_start= str_i_layer + length(layerTypeWanted)-1;
            i=str_start; % index one before where the numbers will start

            while(true)
                i=i+1;

                if(isletter(currLayerInfo(i))) % a letter denotes next layer "label tag"
                    break;
                end

                if(i==length(currLayerInfo)) % end of the layer string
                    i=i+1; % this is the last number so step one more to get the indexing to include it...
                    break;
                end

            end

            %Numbers of the ROI's that we want the data from
            layersToUse=str2num(currLayerInfo(str_start+1:i-1));

            if qq<=size(x.strct.dSignal1,1) && sum(layersToUse==qq) % AND this ROI is within the
correct
                % if this ROI is within the 'layerToUse' list of number of ROIs recorded
                % and if this ROI was listed within the wanted layer of the
                % brain...
                try
                    out(count).layer=layer{ss};
                    out(count).flyID=flyID{ss};
                    out(count).name=in(ii).name;
                    out(count).cell=in(ii).cell;

                    frame_nums = x.strct.frame_nums;
                    fps=x.strct.xml.framerate;
                    %now: # frames / framerate makes timing vector
                    AV_ROIS_resp=x.strct.AV_ROIS_resp{1,qq};
                    t=[1:length(AV_ROIS_resp)]/fps;
                    %Timing vector for interpolation at 10Hz (0.1), starts at ends with 0.5/fps shift
                    it=[0.5/fps:0.1:(length(AV_ROIS_resp)+0.5)/fps];

                    iAV_ROI_resp=nan(size(AV_ROIS_resp,1), length(it));

```

```

for oo=1:size(AV_ROIS_resp,1)
    iAV_ROI_resp(oo,:)=interp1(t,AV_ROIS_resp(oo,:),it,'linear','extrap');
end

out(count).iAV_ROI_resp=iAV_ROI_resp;

count=count+1;
catch
end

end
end

else
    disp([in(ii).name ' unfound -- skipping']);
end
end

cd(currd);

```

---

## Moving edge analysis-related script

Script name: aggregate\_avROIResp\_elif.m

%It aggregates (trial average)responses for all ROIs and organiye data by fly.

```

function out = aggregate_avROIResp_elif(in)

n_epoch=size(in(1).iAV_ROI_resp,1);
%find min epoch duration, therefore take randomly responses of cells from
%diff flies and check the length of the AV_ROI_resp:

Ind=randi(length(in),10);
for IND=1:size(Ind,1);
    dur(IND)=size(in(Ind(IND)).iAV_ROI_resp,2);
end
dur= min(dur);

rats = zeros([length(in),n_epoch,dur]); % all cell responses
name = cell(length(in),1);
flyID=zeros(length(in),1);
for ii=1:length(in)

    rats(ii, :, :) = in(ii).iAV_ROI_resp(:,1:dur);
    name{ii}=in(ii).name;

end

flyID = [in.flyID];
Flys=unique(flyID);

MeanOf_Cells=zeros(length(Flys),n_epoch,dur);

```

```
StdOf_Cells=zeros(length(Flys),n_epoch,dur);
```

```
for NFly=1:length(Flys)
```

```
    FlyID=Flys(NFly);
```

```
    Ind=find(flyID==FlyID);
```

```
    MeanOf_Cells(NFly,:)=mean(rats(Ind,:,:),1);
```

```
    StdOf_Cells(NFly,:)=std(rats(Ind,:,:),1);
```

```
end
```

```
out.rats = rats;
```

```
out.neuron = [in.cell];
```

```
out.flyID = [in.flyID];
```

```
out.name = name;
```

```
out.MeanOF_Cells = MeanOf_Cells;
```

```
out.StdOf_Cells = StdOf_Cells;
```

-----

-----



## DSI, PD, ND calculation and polar plots script

Script name: Polarplots\_PD\_ND\_DSI\_quantification\_elif

% This script plots Polar plots, PD, ND, and DSI quantification for moving  
% ON and OFF edges from manually selected ROIs.  
% Input data must have been generated by moving\_edge\_analysis script.

% Authors: Miriam Henning and Sebastian Molina-Obando

close all  
clear all  
clc

### %% USER INPUT: CONSTANTS

savingData = false; %"True" for saving data (variables and plots) in a folder in your computer.  
Otherwise, write "false".  
% Type the name of the folder  
save\_as= 'Df +';%'+ +', 'D +', 'Df +', 'D Df', '+ + 2.5uM PTX', '+ + 2.5uM PTX Control', '+ + 100uM  
MPEP'  
load\_data\_from =  
'C:\MATLAB\_FOLDER\2p\2p\_pData\T4\_T5\_Layer\_Data\T4\_T5\_LexA\_LexAop\_GCaMP6f\_rec2  
8\LumDecLumInc\_8Dir\_opt\Df +'; % Select where your data has been stored

% Choosing colors for every layer

COLOR\_OF\_PLOT\_LPA = [0 .5 0]; % GREEN  
COLOR\_CLOUD\_LPA = [.5 .7 .5]; % GREEN cloud

COLOR\_OF\_PLOT\_LPB = [0 0 1]; %BLUE;  
COLOR\_CLOUD\_LPB = [.5 .5 1]; %BLUE cloud

COLOR\_OF\_PLOT\_LPC = [1 0 0]; %RED  
COLOR\_CLOUD\_LPC = [1 .5 .5]; %RED cloud

COLOR\_OF\_PLOT\_LPD = [.7 .7 0];%YELLOW  
COLOR\_CLOUD\_LPD = [.9 .9 .5]; %YELLOW cloud

COLOR\_OF\_PLOT\_M9 = [99/256 99/256 99/256]; %GREY  
COLOR\_CLOUD\_M9 = [189/256 189/256 189/256]; %GREY cloud

COLOR\_OF\_PLOT\_Lo = [99/256 99/256 99/256]; %GREY  
COLOR\_CLOUD\_Lo = [189/256 189/256 189/256]; %GREY cloud

Color=[COLOR\_OF\_PLOT\_LPA;COLOR\_OF\_PLOT\_LPB;COLOR\_OF\_PLOT\_LPC;COLOR\_OF\_PLOT\_LPD];

### %% Data Analysis

% Loading Data and data organization

Condition = load([load\_data\_from,'processed\_Data\_manualROIs.mat']);  
Conditions={ 'Condition'};  
LAYERS = ["LPA","LPB","LPC","LPD"]; % ["LPA","LPB","LPC","LPD","M9","Lo"];  
["LPA","LPB","LPC","LPD"];  
onedeg=2\*pi/360; %in rad  
theta=[90, 45, 0, 315, 270, 225, 180, 135, 90]; % For 8 directions

```
direction = theta;
theta=theta*onedeg;
```

```
%% Extract response peaks to every direction for the OFF and ON edge
```

```
NCon=2; %Number of Contrasts (here Only ON and OFF)
```

```
for NCon=1:length(Conditions)
```

```
    COND=eval(Conditions{NCon});
```

```
    LPA=COND.T4T5_LPA_agg.MeanOF_Cells;
```

```
    LPB=COND.T4T5_LPB_agg.MeanOF_Cells;
```

```
    LPC=COND.T4T5_LPC_agg.MeanOF_Cells;
```

```
    LPD=COND.T4T5_LPD_agg.MeanOF_Cells;
```

```
%Plotting whole traces for each layer and all directions
```

```
t= 0.1:0.1:size(COND.T4T5_LPA_agg.rats,3)/10;
```

```
if length(LAYERS)> 4
```

```
    M9=COND.T4T5_M9_agg.MeanOF_Cells;
```

```
    Lo=COND.T4T5_Lo_agg.MeanOF_Cells;
```

```
end
```

```
for L = 1: length(LAYERS)
```

```
    LAYER = char(LAYERS(L));
```

```
    cur_LAYER = eval(['COND.T4T5_',LAYER,'_agg.MeanOF_Cells']);
```

```
    COLOR_OF_PLOT = eval(['COLOR_OF_PLOT_',LAYER]);
```

```
    COLOR_CLOUD = eval(['COLOR_CLOUD_',LAYER]);
```

```
    figure(L)
```

```
    hold on
```

```
    for d = 1:8
```

```
        subplot(4,2,d)
```

```
        patch([0 4 4 0],[-0.5 -0.5 45 45],[0.85 0.85 0.85],'EdgeColor','none');
```

```
        set(gca, 'XLim', [0 8])
```

```
        set(gca, 'YLim', [-0.5 2.5])
```

```
        plot_err_patch_v2(t, squeeze(nanmean(cur_LAYER(:,d,:),1)),...
        (squeeze(nanstd(cur_LAYER(:,d,:),1)))/sqrt(size(cur_LAYER,1))...
```

```
        ,COLOR_OF_PLOT,COLOR_CLOUD);
```

```
        title(['T4&T5 NFlies = ', num2str(size(cur_LAYER,1)),' ', char(LAYER), ' Deg ',
        int2str(direction(d))])
```

```
    end
```

```
end
```

```
F1 = figure(1);
```

```
F2 = figure(2);
```

```
F3 = figure(3);
```

```
F4 = figure(4);
```

```
if length(LAYERS)> 4
```

```
    F5 = figure(5);
```

```
    F6 = figure(6);
```

```
end
```

```
%Before check if all Layers have same N(number of flies)
```

```
N=unique([size(LPA,1), size(LPB,1), size(LPC,1), size(LPD,1)]);
```

```
if N>1 %if one of the Layers was not selected in all Flies
```

```
    new=min(N);
```

```

LPA=LPA(1:new,,:);
LPB=LPB(1:new,,:);
LPC=LPC(1:new,,:);
LPD=LPD(1:new,,:);
end

```

```

OFF_A=max(LPA(:,1:40),[],3);
ON_A=max(LPA(:,41:80),[],3);
OFF_B=max(LPB(:,1:40),[],3);
ON_B=max(LPB(:,41:80),[],3);
OFF_C=max(LPC(:,1:40),[],3);
ON_C=max(LPC(:,41:80),[],3);
OFF_D=max(LPD(:,1:40),[],3);
ON_D=max(LPD(:,41:80),[],3);

```

**% Polar Plot-responses to ON Edge**

```

F7= figure('Color', [1 1 1],'Position', [200 200 800 400]);
subplot(1,2,1)
P = polar(theta, 2 * ones(size(theta)));
set(P, 'Visible', 'off')
hold on

```

**for i=1:4 %four Layers**

```

LAYERS=['A','B','C','D'];

```

```

tuningPdirPFly=eval(['ON_',LAYERS(i)]); %tuning (strength of response) per direction
and per fly
mtuningPdir=nanmean(tuningPdirPFly,2);
stuningPdir=nanstd(tuningPdirPFly)/sqrt(length(tuningPdirPFly));
rho=[mtuningPdir;mtuningPdir(1)];
PPp(i)=polar(theta,rho);
PPp(i).Color=Color(i,:);
hold on

```

**% Adding the error bars**

```

for ii=1:length(theta)-1

    e=stuningPdir(ii);
    m=mtuningPdir(ii);
    angle2=theta(ii);
    P=polar([angle2 angle2], [m-e, m+e]);
    P.Color=Color(i,:);

```

```

end
end
[PPp.LineWidth] = deal(1.5)

```

```

LegendName={'LayerA', 'LayerB', 'LayerC', 'LayerD'};
set(gca,'YTickLabel','')
set(gca,'FontSize',13)

```

```

title([save_as, '( N= ', num2str(size(LPA,1)), ') : Responses to ON Edge']);

```

**%For ON: DSI, PD and ND**

```

F10= figure('Color', [1 1 1],'Position', [200 200 800 400]);

```

```

subplot(1,2,1)

for i=1:4 %four Layers

    LAYERS=['A','B','C','D'];

    tuningPdirPFly=eval(['ON_',LAYERS(i)]); %tuning (strength of response) per direction
and per fly

    % Calculation of direction selectivity index for ON
    tuningPdirPFly = tuningPdirPFly + 1;
    ON_Edge_PD_response_Fly = max(tuningPdirPFly,[],1);
    for r = 1: size(tuningPdirPFly,2)
        FlyVector = tuningPdirPFly(:,r);
        i_PD(r) = find(FlyVector == ON_Edge_PD_response_Fly(r));
        FlyVector2 = [FlyVector;FlyVector];
        i_ND(r) = i_PD(r) + 4;
        ON_Edge_ND_response_Fly(r) = FlyVector2(i_ND(r));
    end
    ON_ND_response_Fly{i} = (ON_Edge_ND_response_Fly)-1; % Seb: subtract the 1
previously added
    ON_PD_response_Fly{i} = (ON_Edge_PD_response_Fly) -1;% Seb: subtract the 1
previously added
    ON_DSindexFly = (ON_Edge_PD_response_Fly -
ON_Edge_ND_response_Fly)./ON_Edge_PD_response_Fly;
    LAYER_ON_DSindexFly{i} = ON_DSindexFly;
    ON_DSindex_mean = mean(ON_DSindexFly)
    ON_DSindex_std = std(ON_DSindexFly);
    ON_DSindex_sem = ON_DSindex_std/sqrt(length(ON_DSindexFly))

    %BarPlot direction selective index (DSI) for ON
    hold on;
    b1= bar(i,ON_DSindex_mean,'FaceColor','flat');
    e = errorbar(i,ON_DSindex_mean,ON_DSindex_sem,'k. ');
    b1.FaceColor = Color(i,:);
    e.LineWidth = 0.75;
    ylim([0 1]);

end
ylabel('DSI');
title(['ON Edge 8D. LAYERS ', save_as]);

% Amplitude Response PD BarPlot
F11= figure('Color', [1 1 1],'Position', [200 200 800 400]);
subplot(1,2,1)

for i=1:4 %four Layers

    LAYERS=['A','B','C','D'];

    tuningPdirPFly=eval(['ON_',LAYERS(i)]); %tuning (strength of response) per direction
and per fly

    ON_PD_mean = mean(ON_PD_response_Fly{i})
    ON_PD_std = std(ON_PD_response_Fly{i});
    ON_PD_sem = ON_PD_std/sqrt(length(ON_PD_response_Fly{i}))

    %BarPlot prefer direction (PD) for ON

```

```

hold on;
b2= bar(i,ON_PD_mean,'FaceColor','flat');
e = errorbar(i,ON_PD_mean,ON_PD_sem,'k. ');
b2.FaceColor = Color(i,:);
e.LineWidth = 0.75;
ylim([0 3]);

end
ylabel('PD dF/F');
title(['ON Edge 8D. LAYERS ', save_as]);

% Amplitude Response ND BarPlot
F12= figure('Color', [1 1 1],'Position', [200 200 800 400]);
subplot(1,2,1)

for i=1:4 %four Layers

    LAYERS=['A','B','C','D'];

    tuningPdirPFly=eval(['ON_',LAYERS(i)]); %tuning (strength of response) per direction
and per fly

    ON_ND_mean = mean(ON_ND_response_Fly{i});
    ON_ND_std = std(ON_ND_response_Fly{i});
    ON_ND_sem = ON_ND_std/sqrt(length(ON_ND_response_Fly{i}));

    %BarPlot null direction (ND) for ON
    hold on;
    b2= bar(i,ON_ND_mean,'FaceColor','flat');
    e = errorbar(i,ON_ND_mean,ON_ND_sem,'k. ');
    b2.FaceColor = Color(i,:);
    e.LineWidth = 0.75;
    ylim([0 3]);

end
ylabel('ND dF/F');
title(['ON Edge 8D. LAYERS ', save_as]);

% Polar Plot-responses to OFF Edge
figure(F7)
subplot(1,2,2)
P = polar(theta, 2 * ones(size(theta)));
set(P, 'Visible', 'off')
hold on

for i=1:4 %four Layers

    LAYERS=['A','B','C','D'];

    tuningPdirPFly=eval(['OFF_',LAYERS(i)]); %tuning (strength of response) per direction
and per fly

    mtuningPdir=nanmean(tuningPdirPFly,2);
    stuningPdir=nanstd(tuningPdirPFly)/sqrt(length(tuningPdirPFly));
    rho=[mtuningPdir;mtuningPdir(1)];
    PPp(i)=polar(theta,rho);
    PPp(i).Color=Color(i,:);
    hold on
    PolarPlot_std_new

```

```

end
[PPp.LineWidth] = deal(1.5)

set(gca,'YTickLabel','')
set(gca,'FontSize',13)

title([Conditions{NCon}, ' ( N= ', num2str(size(LPA,1)), ') : Responses to OFF Edge']);

%For OFF: DSI, PD and ND
figure(F10)
subplot(1,2,2)

for i=1:4 %four Layers

    LAYERS=['A','B','C','D'];

    % Calculation of direction selectivity index for OFF
    tuningPdirPFly=eval(['OFF_',LAYERS(i)]); %tuning (strength of response) per direction
and per fly
    % Calculation of direction selectivity index for OFF
    tuningPdirPFly = tuningPdirPFly + 1; %Seb: adding 1
    OFF_Edge_PD_response_Fly = max(tuningPdirPFly,[],1);
    for r = 1: size(tuningPdirPFly,2)
        FlyVector = tuningPdirPFly(:,r);
        i_PD(r) = find(FlyVector == OFF_Edge_PD_response_Fly(r));
        FlyVector2 = [FlyVector;FlyVector];
        i_ND(r) = i_PD(r) + 4;
        OFF_Edge_ND_response_Fly(r) = FlyVector2 (i_ND(r));
    end
    OFF_ND_response_Fly{i} = (OFF_Edge_ND_response_Fly)- 1; % Seb: subtract the 1
previously added
    OFF_PD_response_Fly{i} = (OFF_Edge_PD_response_Fly)- 1; % Seb: subtract the 1
previously added
    OFF_DSindexFly = (OFF_Edge_PD_response_Fly -
OFF_Edge_ND_response_Fly)./OFF_Edge_PD_response_Fly;
    LAYER_OFF_DSindexFly{i} = OFF_DSindexFly;
    OFF_DSindex_mean = mean(OFF_DSindexFly)
    OFF_DSindex_std = std(OFF_DSindexFly);
    OFF_DSindex_sem = OFF_DSindex_std/sqrt(length(OFF_DSindexFly))

    %BarPlot direction selective index (DSI) for OFF
    hold on;
    b1= bar(i,OFF_DSindex_mean,'FaceColor','flat');
    e = errorbar(i,OFF_DSindex_mean,OFF_DSindex_sem,'k. ');
    b1.FaceColor = Color(i,:);
    e.LineWidth = 0.75;
    ylim([0 1]);

end
ylabel('DSI');
title(['OFF Edge 8D. LAYERS ', save_as]);

% Amplitude Response ND BarPlot
figure(F12)
subplot(1,2,2)

for i=1:4 %four Layers

```

```

LAYERS=['A','B','C','D'];

tuningPdirPFly=eval(['OFF_',LAYERS(i)']); %tuning (strength of response) per direction
and per fly

OFF_ND_mean = mean( OFF_ND_response_Fly{i});
OFF_ND_std = std( OFF_ND_response_Fly{i});
OFF_ND_sem = OFF_ND_std/sqrt(length(OFF_ND_response_Fly{i}));

%BarPlot null direction (ND) for OFF
hold on;
b2= bar(i,OFF_ND_mean,'FaceColor','flat');
e = errorbar(i,OFF_ND_mean,OFF_ND_sem,'k. ');
b2.FaceColor = Color(i,:);
e.LineWidth = 0.75;
ylim([0 3]);

end
ylabel('ND dF/F');
title(['OFF Edge 8D. LAYERS ', save_as]);

% Amplitude Response PD BarPlot
figure(F11)
subplot(1,2,2)

for i=1:4 %four Layers

LAYERS=['A','B','C','D'];

tuningPdirPFly=eval(['OFF_',LAYERS(i)']); %tuning (strength of response) per direction
and per fly

OFF_PD_mean = mean(OFF_PD_response_Fly{i})
OFF_PD_std = std(OFF_PD_response_Fly{i});
OFF_PD_sem = OFF_PD_std/sqrt(length(OFF_PD_response_Fly{i}))

%BarPlot prefer direction (PD) for OFF
hold on;
b2= bar(i,OFF_PD_mean,'FaceColor','flat');
e = errorbar(i,OFF_PD_mean,OFF_PD_sem,'k. ');
b2.FaceColor = Color(i,:);
e.LineWidth = 0.75;
ylim([0 3]);

end
ylabel('PD dF/F');
title(['OFF Edge 8D. LAYERS ', save_as]);

end

%% Saving Data
if savingData

saveas(F1,
['C:\MATLAB_FOLDER\2p\2p_pData\T4_T5_Layer_Data\T4_T5_LexA_LexAop_GCaMP6f_rec
28\LumDecLumInc_8Dir_opt\ ', save_as, '\LPA_traces.pdf']);

```

```

saveas(F2,
['C:\MATLAB_FOLDER\2p\2p_pData\T4_T5_Layer_Data\T4_T5_LexA_LexAop_GCaMP6f_rec
28\LumDecLumInc_8Dir_opt\', save_as, 'LPB_traces.pdf']);
saveas(F3,
['C:\MATLAB_FOLDER\2p\2p_pData\T4_T5_Layer_Data\T4_T5_LexA_LexAop_GCaMP6f_rec
28\LumDecLumInc_8Dir_opt\', save_as, 'LPC_traces.pdf']);
saveas(F4,
['C:\MATLAB_FOLDER\2p\2p_pData\T4_T5_Layer_Data\T4_T5_LexA_LexAop_GCaMP6f_rec
28\LumDecLumInc_8Dir_opt\', save_as, 'LPD_traces.pdf']);
saveas(F5,
['C:\MATLAB_FOLDER\2p\2p_pData\T4_T5_Layer_Data\T4_T5_LexA_LexAop_GCaMP6f_rec
28\LumDecLumInc_8Dir_opt\', save_as, 'M9_traces.pdf']);
saveas(F6,
['C:\MATLAB_FOLDER\2p\2p_pData\T4_T5_Layer_Data\T4_T5_LexA_LexAop_GCaMP6f_rec
28\LumDecLumInc_8Dir_opt\', save_as, 'Lo_traces.pdf']);

```

```

saveas(F7,
['C:\MATLAB_FOLDER\2p\2p_pData\T4_T5_Layer_Data\T4_T5_LexA_LexAop_GCaMP6f_rec
28\LumDecLumInc_8Dir_opt\', save_as, 'PolarPlot_8D.pdf']);
saveas(F10,
['C:\MATLAB_FOLDER\2p\2p_pData\T4_T5_Layer_Data\T4_T5_LexA_LexAop_GCaMP6f_rec
28\LumDecLumInc_8Dir_opt\', save_as, 'DSI_8D_Fly_LAYER.pdf']);
saveas(F11,
['C:\MATLAB_FOLDER\2p\2p_pData\T4_T5_Layer_Data\T4_T5_LexA_LexAop_GCaMP6f_rec
28\LumDecLumInc_8Dir_opt\', save_as, 'PD_Response.pdf']);
saveas(F12,
['C:\MATLAB_FOLDER\2p\2p_pData\T4_T5_Layer_Data\T4_T5_LexA_LexAop_GCaMP6f_rec
28\LumDecLumInc_8Dir_opt\', save_as, 'ND_Response.pdf']);

```

```

save(['C:\MATLAB_FOLDER\2p\2p_pData\T4_T5_Layer_Data\T4_T5_LexA_LexAop_GCaMP6
f_rec28\LumDecLumInc_8Dir_opt\', save_as,
'PD_Response_and_DSI_LAYER'], 'LAYER_OFF_DSindexFly', 'LAYER_ON_DSindexFly', 'ON_
PD_response_Fly', 'OFF_PD_response_Fly', 'ON_ND_response_Fly', 'OFF_ND_response_Fly');
end

```
