# Supplementary figures and images for: ON selectivity in the Drosophila visual system is a multisynaptic process involving both glutamatergic and GABAergic inhibition
Source: eLife journal article supplement (doi:10.7554/elife.49373), 2019-09-19

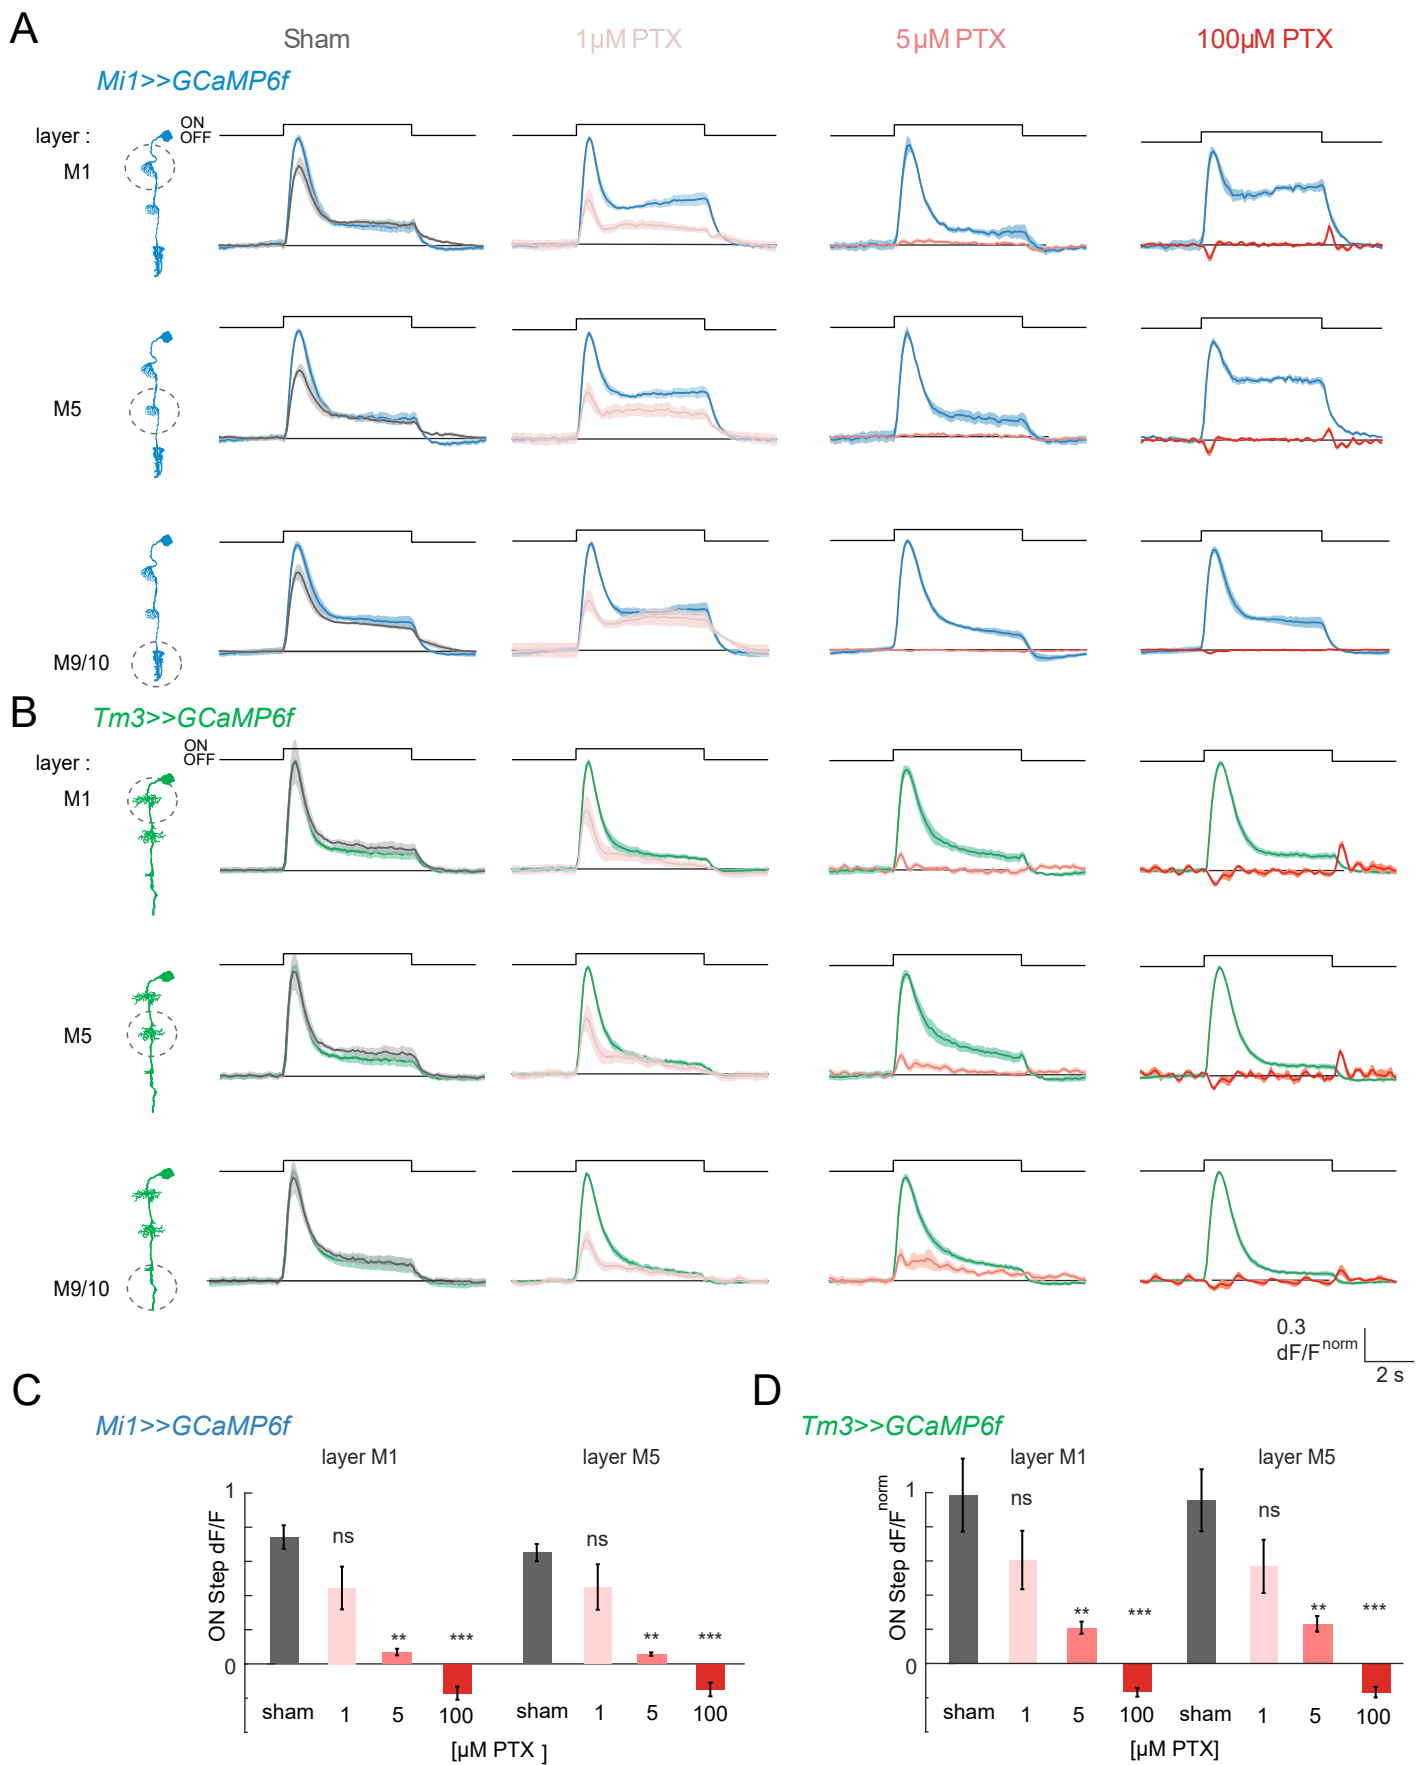

Supplement: supp [file elife-49373-supp-v1.zip]

A

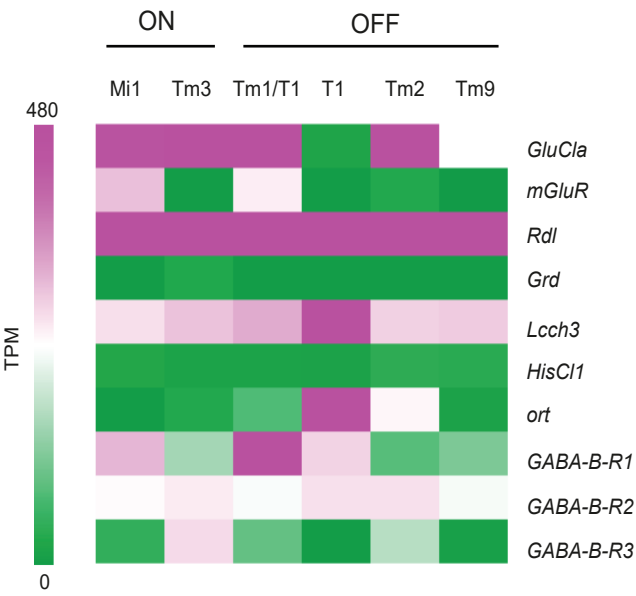

Supplement: supp [file elife-49373-supp-v1.zip]

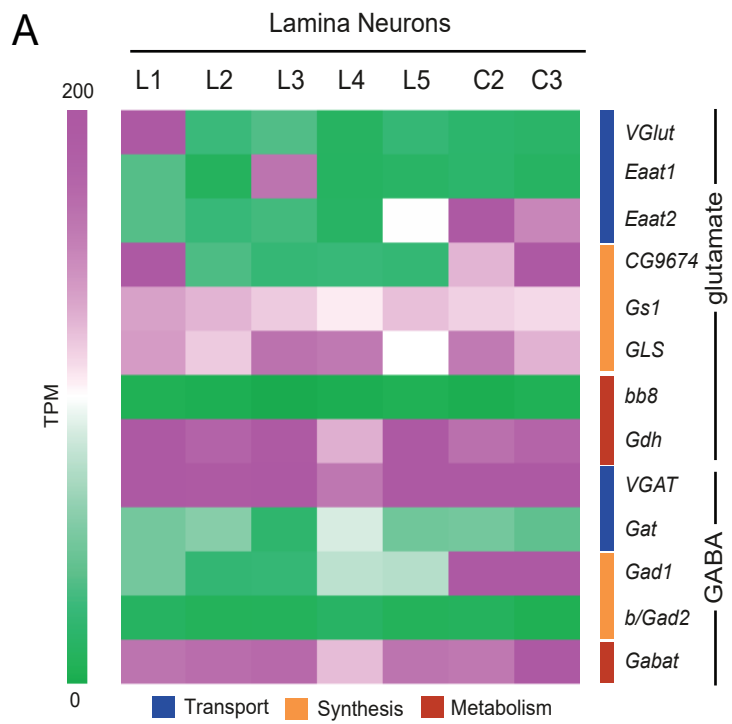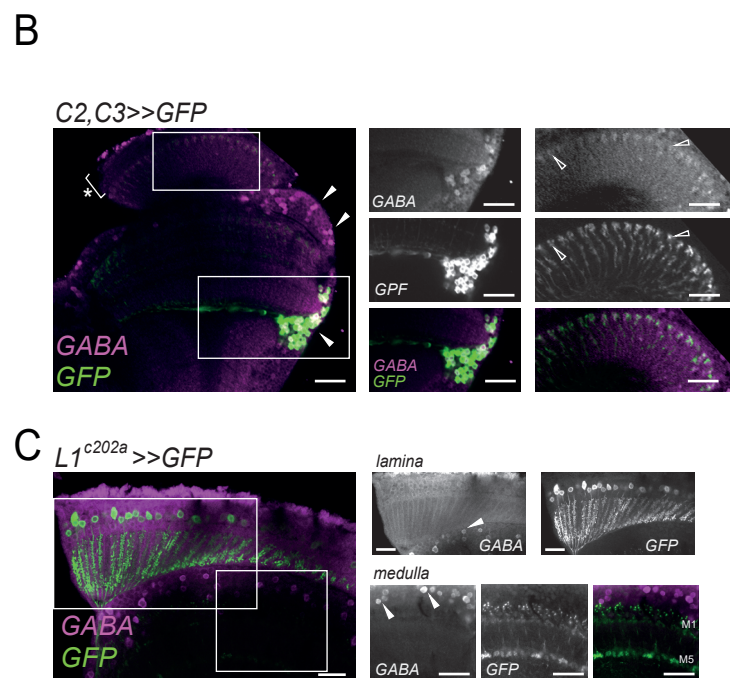

Supplement: supp [file elife-49373-supp-v1.zip]

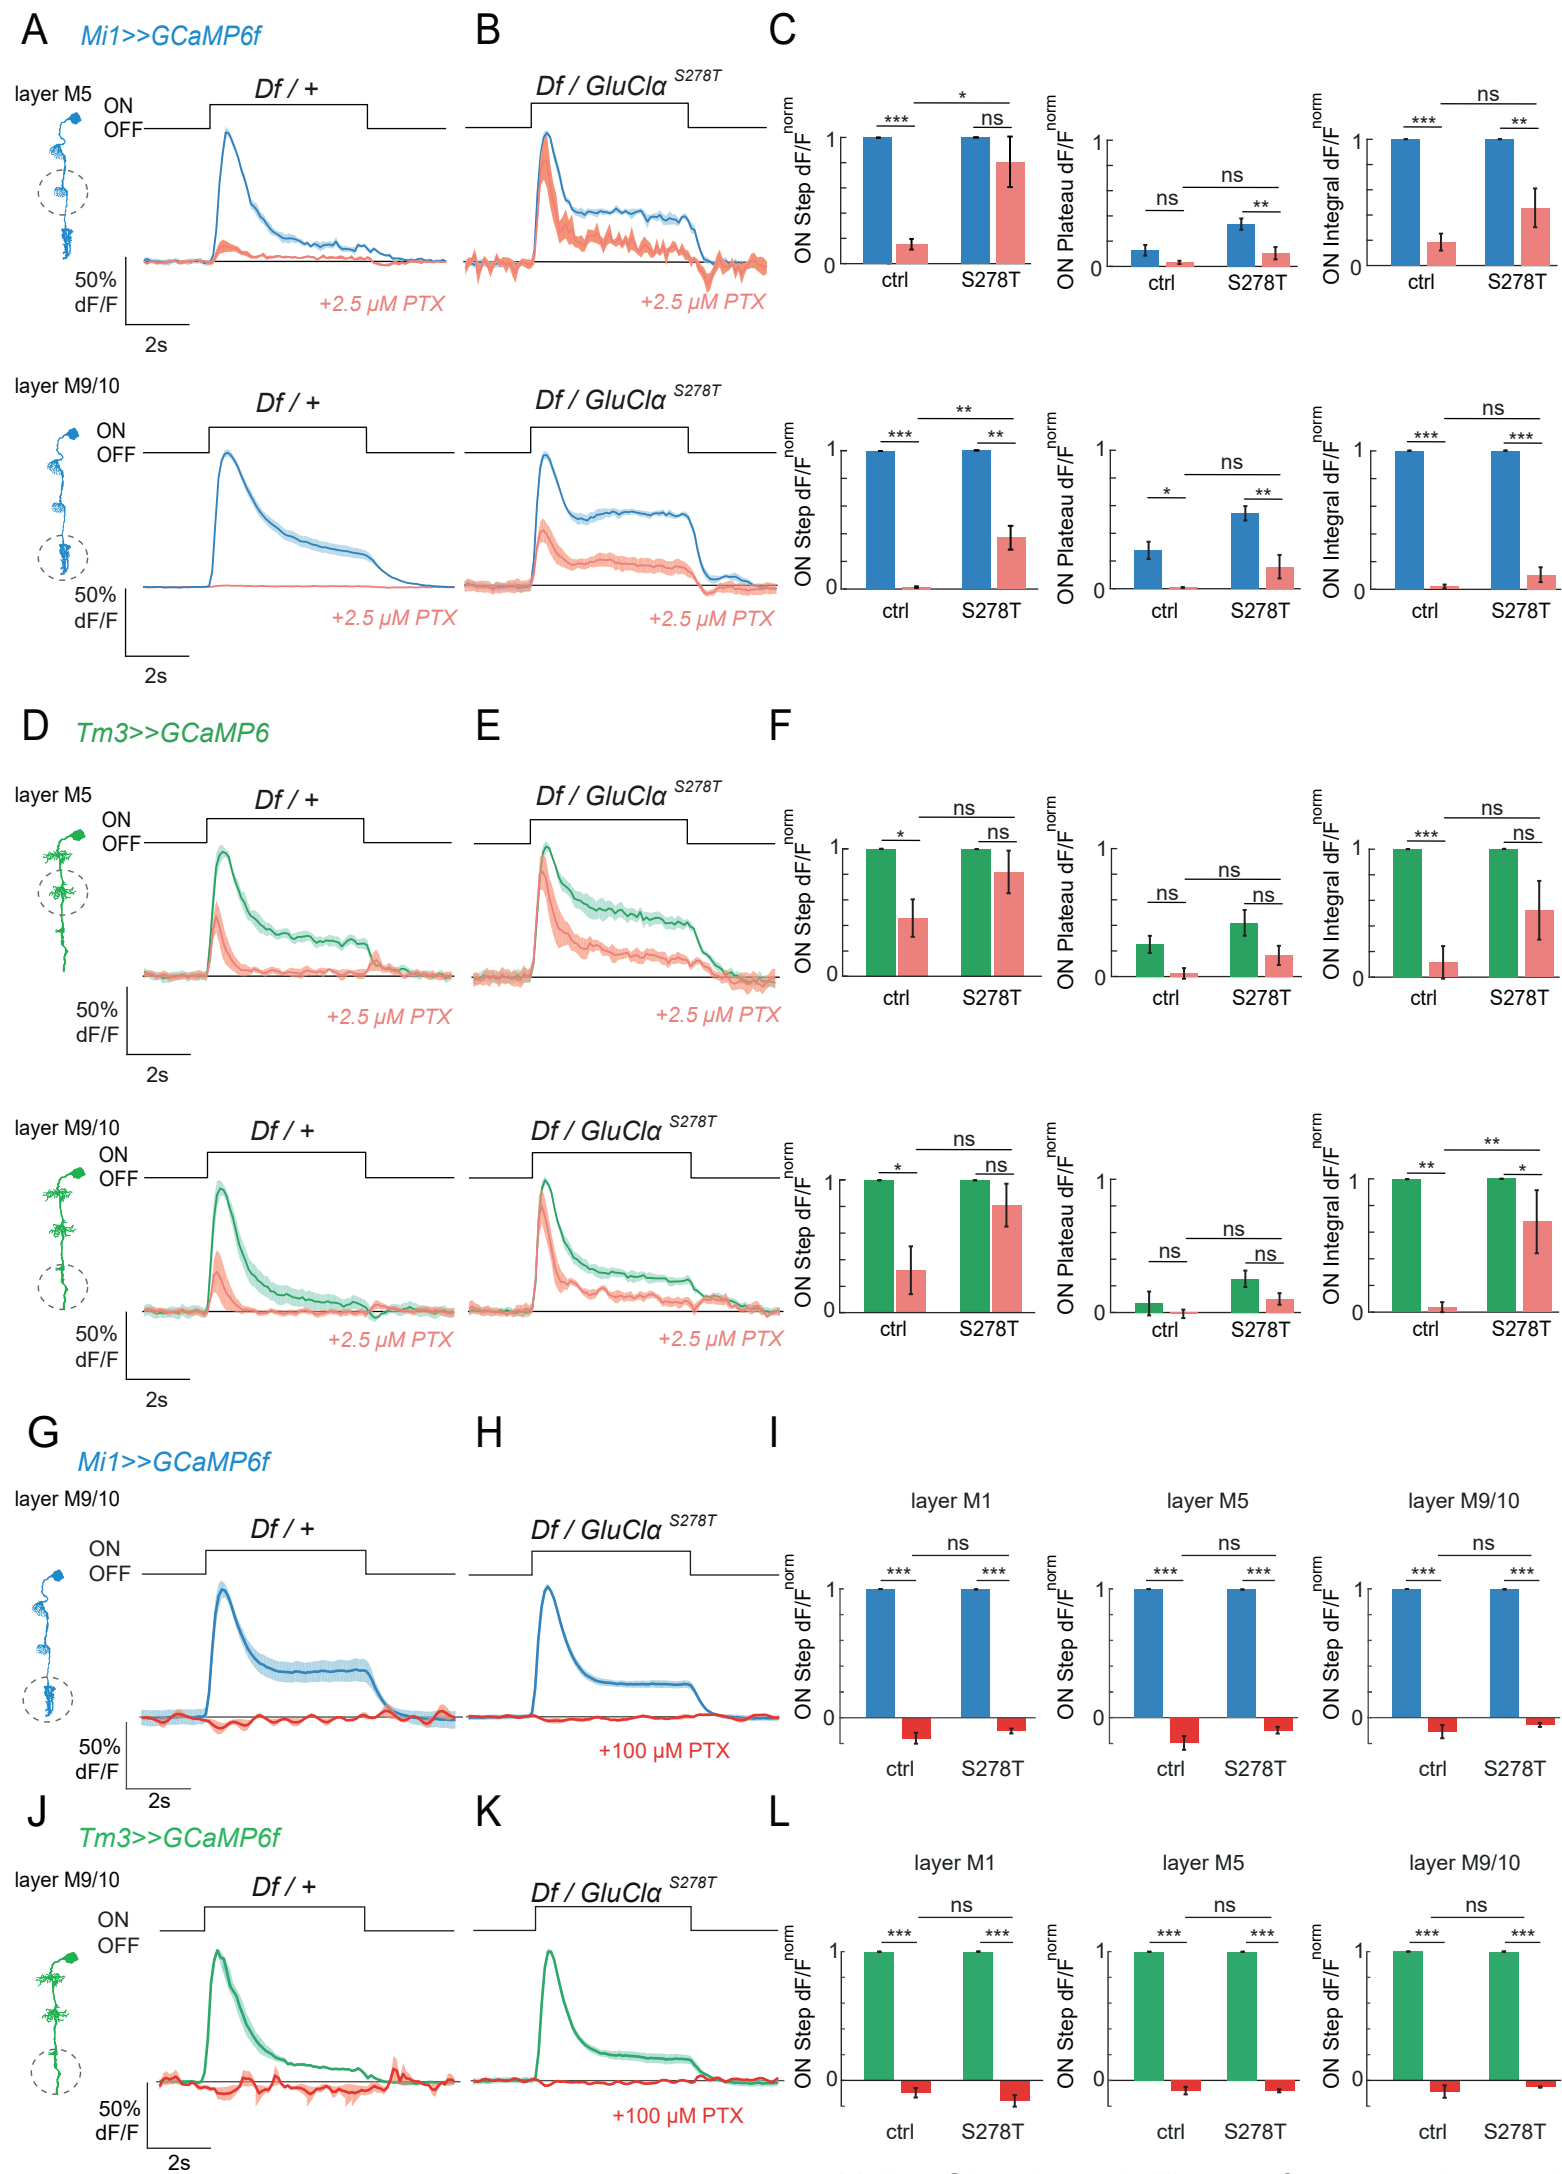

Supplement: supp [file elife-49373-supp-v1.zip]

**A**

*Mi1>>iGluSnFR*

layer :

M1

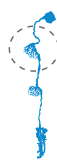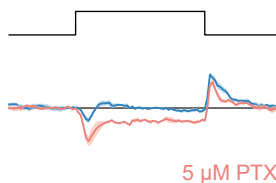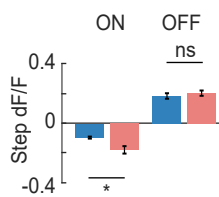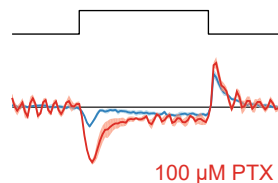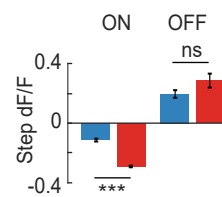

layer :

M5

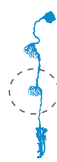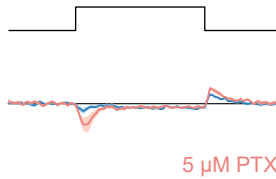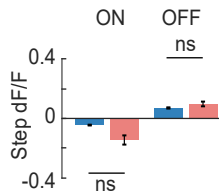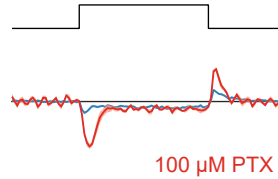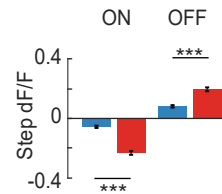

0.2  
dF/F  
2 s

**B**

*Tm3>>iGluSnFR*

layer :

M1

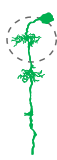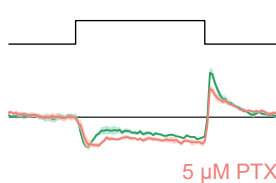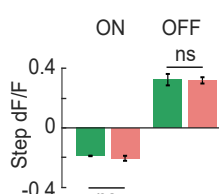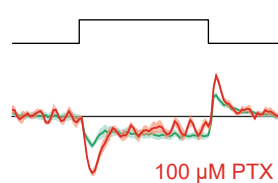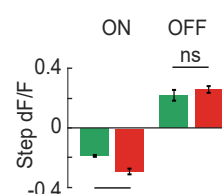

layer :

M5

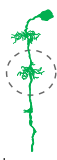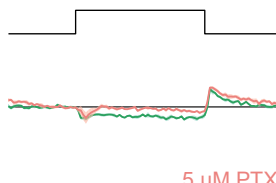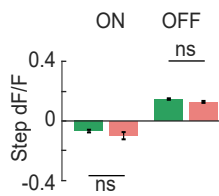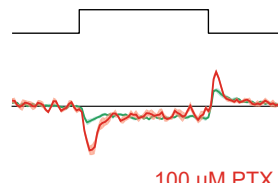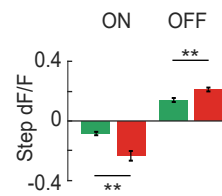

0.2  
dF/F  
2 s

Supplement: supp [file elife-49373-supp-v1.zip]

**A**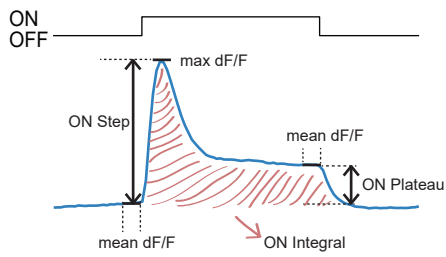**B***Mi1>>GCaMP6f*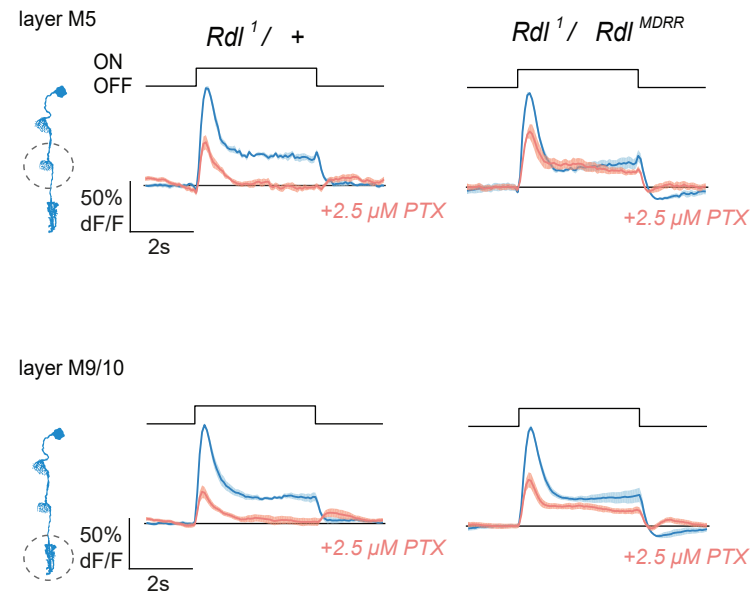**C****D**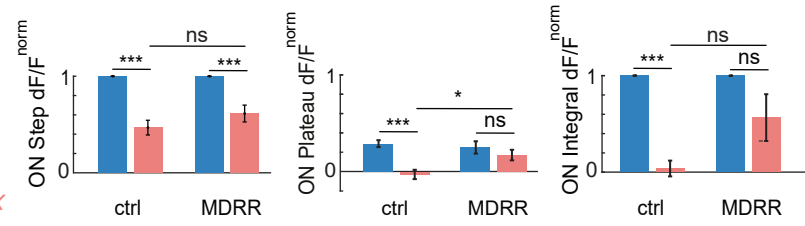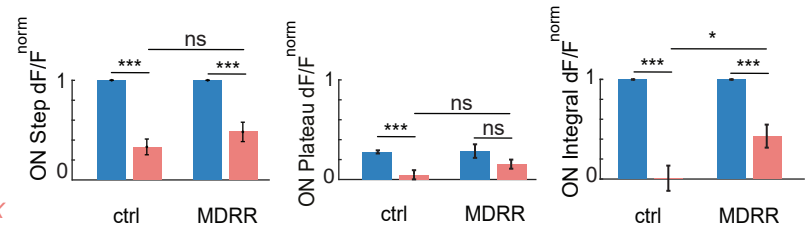**E***Tm3>>GCaMP6*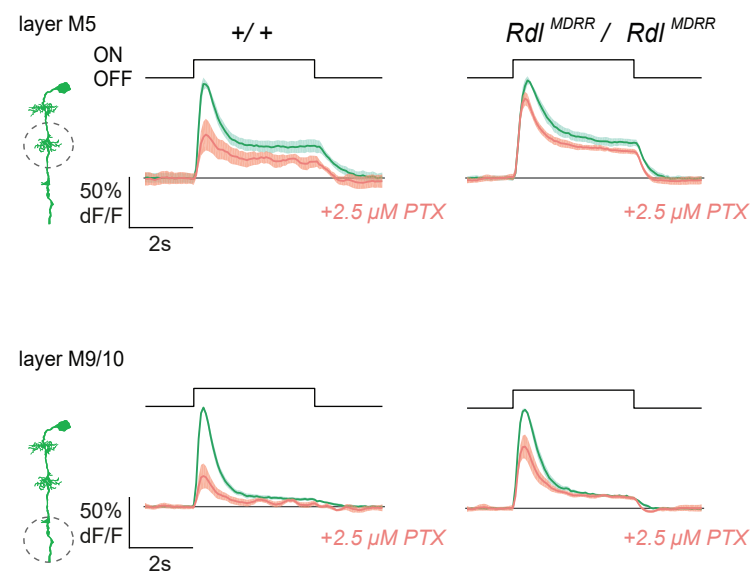**F****G**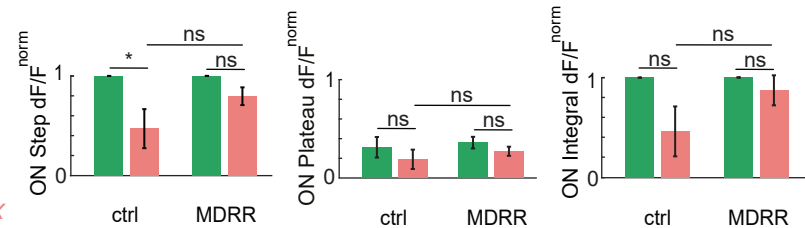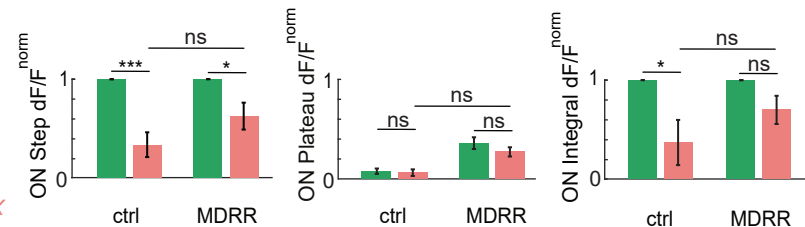

Supplement: supp [file elife-49373-supp-v1.zip]

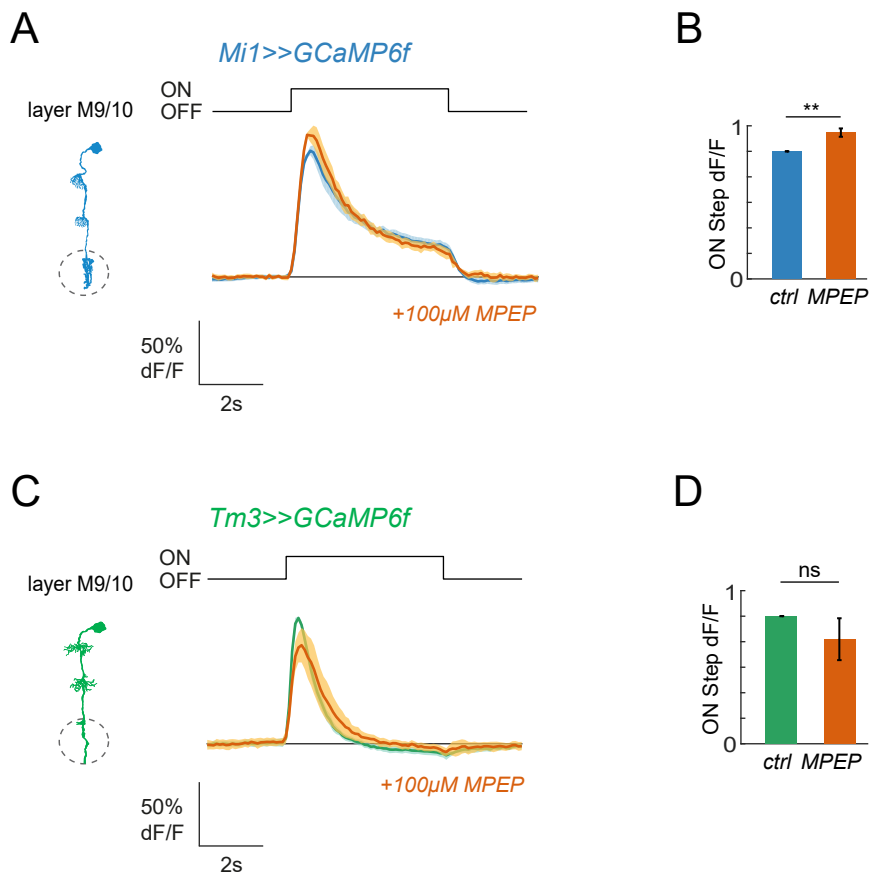

Supplement: supp [file elife-49373-supp-v1.zip]
